# Supplementary material for: An alternative for proteinase K-heat-sensitive protease from fungus Onygena corvina for biotechnology: cloning, engineering, expression, characterization and special application for protein sequencing
Source: PubMed Central journal article supplement (PMC7313183; doi:10.1186/s12934-020-01392-3), 2020-06-24
Supplement: 12934_2020_1392_MOESM3_ESM.pdf [file 12934_2020_1392_MOESM3_ESM.pdf]

**Start** (0)

ApoI  
**EcoRI**

5' GAATTCATGGGTTGTATCAAGGTTATCTCCGTTTTCTTGGCTGCTGTTGCTGCTGTTGACGCTAGAGCTTTTTTC  
3' CTTAAGTACCCAACATAGTTCCAATAGAGGCCAAAAGAACCACGACAACGACGACAACACTGCGATCTCGAAAAAAG

75

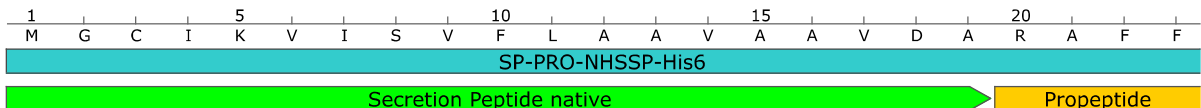

CACAACAAGGGTGGTAACGACATCATCCCAAACCTACATCGTTGTTATGAAGGACGGTATCTCCACTCAAGAG  
GTGTTGTTCCACCATTTGCTGTAGTAGGGTTTGAGGATGTAGCAACAATACTTCTGCCATAGAGGTGAGTTCTC

150

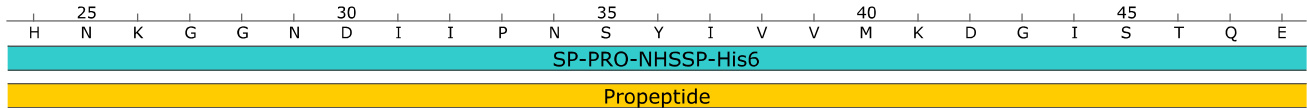

**BstXI**

TTCGAGTCCCACATTTCTTCCGTTTCTGCTACTCACGCTAAGAGATCCACTGAGTTGGTTGGTCACAAGGATTCC  
AAGCTCAGGGTGTAAAGAAGGCAAAGACGATGAGTGCGATTCTCTAGGTGACTCAACCAACCAGTGTTCCCTAAGG

225

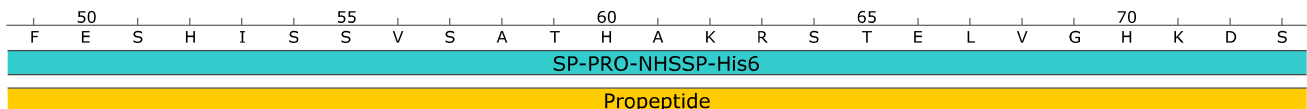

TTCAACATCAACGGTTGGAGAGCTTACAACGGTCACCTTCGATGCTGCTACTTTGGAGTCCATTTTGAACGACGAC  
AAGTTGTAGTTGCCAACCTCTCGAATGTTGCCAGTGAAGCTACGACGATGAAACCTCAGGTAAACTTGTCTGCTG

300

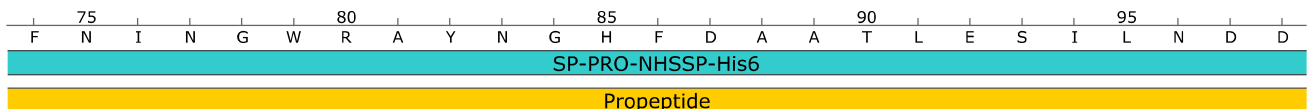

**AclI**

AACGTTAAGTACGTTGAGCACGACAGAGTTGTTAAGATCTCCGCTTTGACTACTCAGCCAAACGCTCCATCTTGG  
TTGCAATTCATGCAACTCGTGCTGTCTCAACAATTCTAGAGGCCAAACTGATGAGTCGGTTTTCGAGGTTAGAACC

375

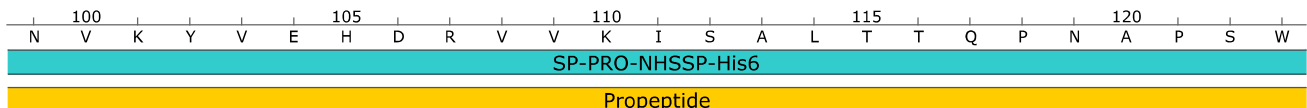

ApoI

**BtsaI**

GGTTTGGGTAGAATTTCTCACAGATCCCCAGGTAACAAGGACTTCGTTTACGATGACACTGCTGGTCAGGGTATC  
CCAAACCCATCTTAAAGAGTGTCTAGGGGTCCATTGTTCTCTGAAGCAAATGCTACTGTGACGACCAGTCCCATAG

450

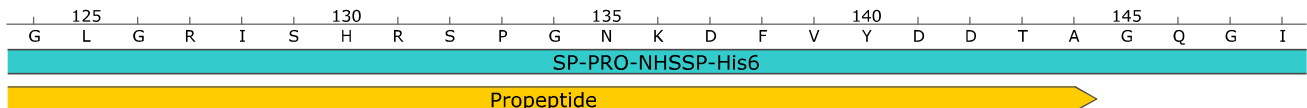

ACTATCTACGGTGTGACACTGGAATCGACATCAACCACCCAGATTTTGGTGGTAGAGCTAGATGGGGAACCTAAC  
TGATAGATGCCACAACCTGTGACCTTAGCTGTAGTTGGTGGGTCTAAAACCACCATCTCGATCTACCCCTTGATTG

525

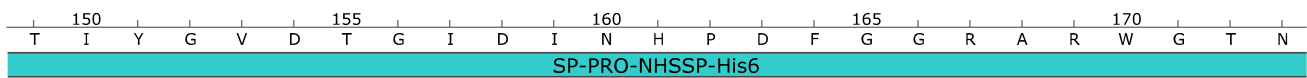

ACTGTTGACAACGCTAACAACGACGGTCATGGTCATGGTACTCATACTGCTGGTACTTTTCGCTGGTAACGCTTAC  
TGACAACCTGTTGCGATTGTTGCTGCCAGTACCAGTACCATGAGTATGACGACCATGAAAGCGACCATTGCGAATG

600

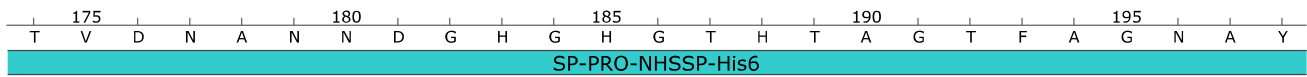

GGTATTGCTAAGAAGGCTTCCGTTGTTGCTGTTAAGGTTTTGTCTGCTTCTGGTTCGGTTCACACGCTGGTGT  
 CCATAACGATTCTTCCGAAGGCAACAACGACAATTCCAAAACAGACGAAGACCAAGGCCAAGGTTGCGACCACAA

675

G I A K K A S V V A V K V L S A S G S G S N A G V  
 SP-PRO-NHSSP-His6

ATTAAGGGTATCGACTGGTGTGTTACAGACGCTAGATCTAAGGGTGCTTTGGGTAAGGCTGCTTTGAACTTGTCT  
 TAATTC CATAGCTGACCACACAATGTCTGCGATCTAGATTC CACGAAACCCATTCCGACGAAACTTGAACAGA

750

I K G I D W C V T D A R S K G A L G K A A L N L S  
 SP-PRO-NHSSP-His6

TTGGGTGGTGGTTTTCAACCAGGCTACAAACGACGCTGTTACTAGAGCTCAGACTGCTGGAATCTTCGTTGCTGT  
 AACCCACCACCAAAGTTGGTCCGATGTTTGTCTGCGACAATGATCTCGAGTCTGACGACCTTAGAAGCAACGACAA

825

L G G G F N Q A T N D A V T R A Q T A G I F V A V  
 SP-PRO-NHSSP-His6

GCTGCTGGTAACGATAACAAGGACGCTAGAACTACTCTCCAGCTTCTGCTCCAGCTGTTTGTACTGTTGCTTCC  
 CGACGACCATTGCTATTGTTCTGCGATCTTTGATGAGAGGTCGAAGACGAGGTCGACAAACATGACAACGAAGG

900

A A G N D N K D A R N Y S P A S A P A V C T V A S  
 SP-PRO-NHSSP-His6

TCCACTATCGACGACCAAAAGTCTCTTTCTCTAACTGGGGTCCATCGTTGACATCTACGCTCCAGGTTCCAAC  
 AGGTGATAGCTGCTGGTTTTTCAGGAGAAAGAGATTGACCCCAAGGTAGCAACTGTAGATGCGAGGTTCAAGGTTG

975

S T I D D Q K S S F S N W G S I V D I Y A P G S N  
 SP-PRO-NHSSP-His6

ATTATTTCCGATGCTCCAGGTGGTGGTGTAGAACTATGTCTGGTACTTCTATGGCTTCCCCACACGTTTGTGGT  
 TAATAAAGGCTACGAGGTCCACCACCACAATCTTGATACAGACCATGAAGATACCGAAGGGGTGTGCAAACACCA

1050

I I S D A P G G V R T M S G T S M A S P H V C G  
 SP-PRO-NHSSP-His6

GCTGGTGTCTGCTATGTTGGCTCAAGGTGTTCCAGTTGGTCAGGTTTGTGACAGATTGAAGCAGATCGGTAACGCT  
 CGACCACGACGATAACAACCGAGTTCACAAAGGTC AACAGTCCAAACACTGTCTAACTTCGTCTAGCCATTGCGA

1125

A G A A M L A Q G V P V G Q V C D R L K Q I G N A  
 SP-PRO-NHSSP-His6

GTTGTTAGAAACCCAGGTACTTCCACTACAAACAGATTGTTGTATAACGGTTCGGTCAGGGTTCTCATCATCAC  
 CAACAATCTTTGGGTCCATGAAGGTGATGTTTGTCTAACAAACATATTGCCAAGGCCAGTCCCAAGAGTAGTAGTG

1200

V V R N P G T S T T N R L L Y N G S G Q G S H H H  
 SP-PRO-NHSSP-His6

His6 tag
