# Supplementary material for: An alternative for proteinase K-heat-sensitive protease from fungus Onygena corvina for biotechnology: cloning, engineering, expression, characterization and special application for protein sequencing
Source: PubMed Central journal article supplement (PMC7313183; doi:10.1186/s12934-020-01392-3), 2020-06-24

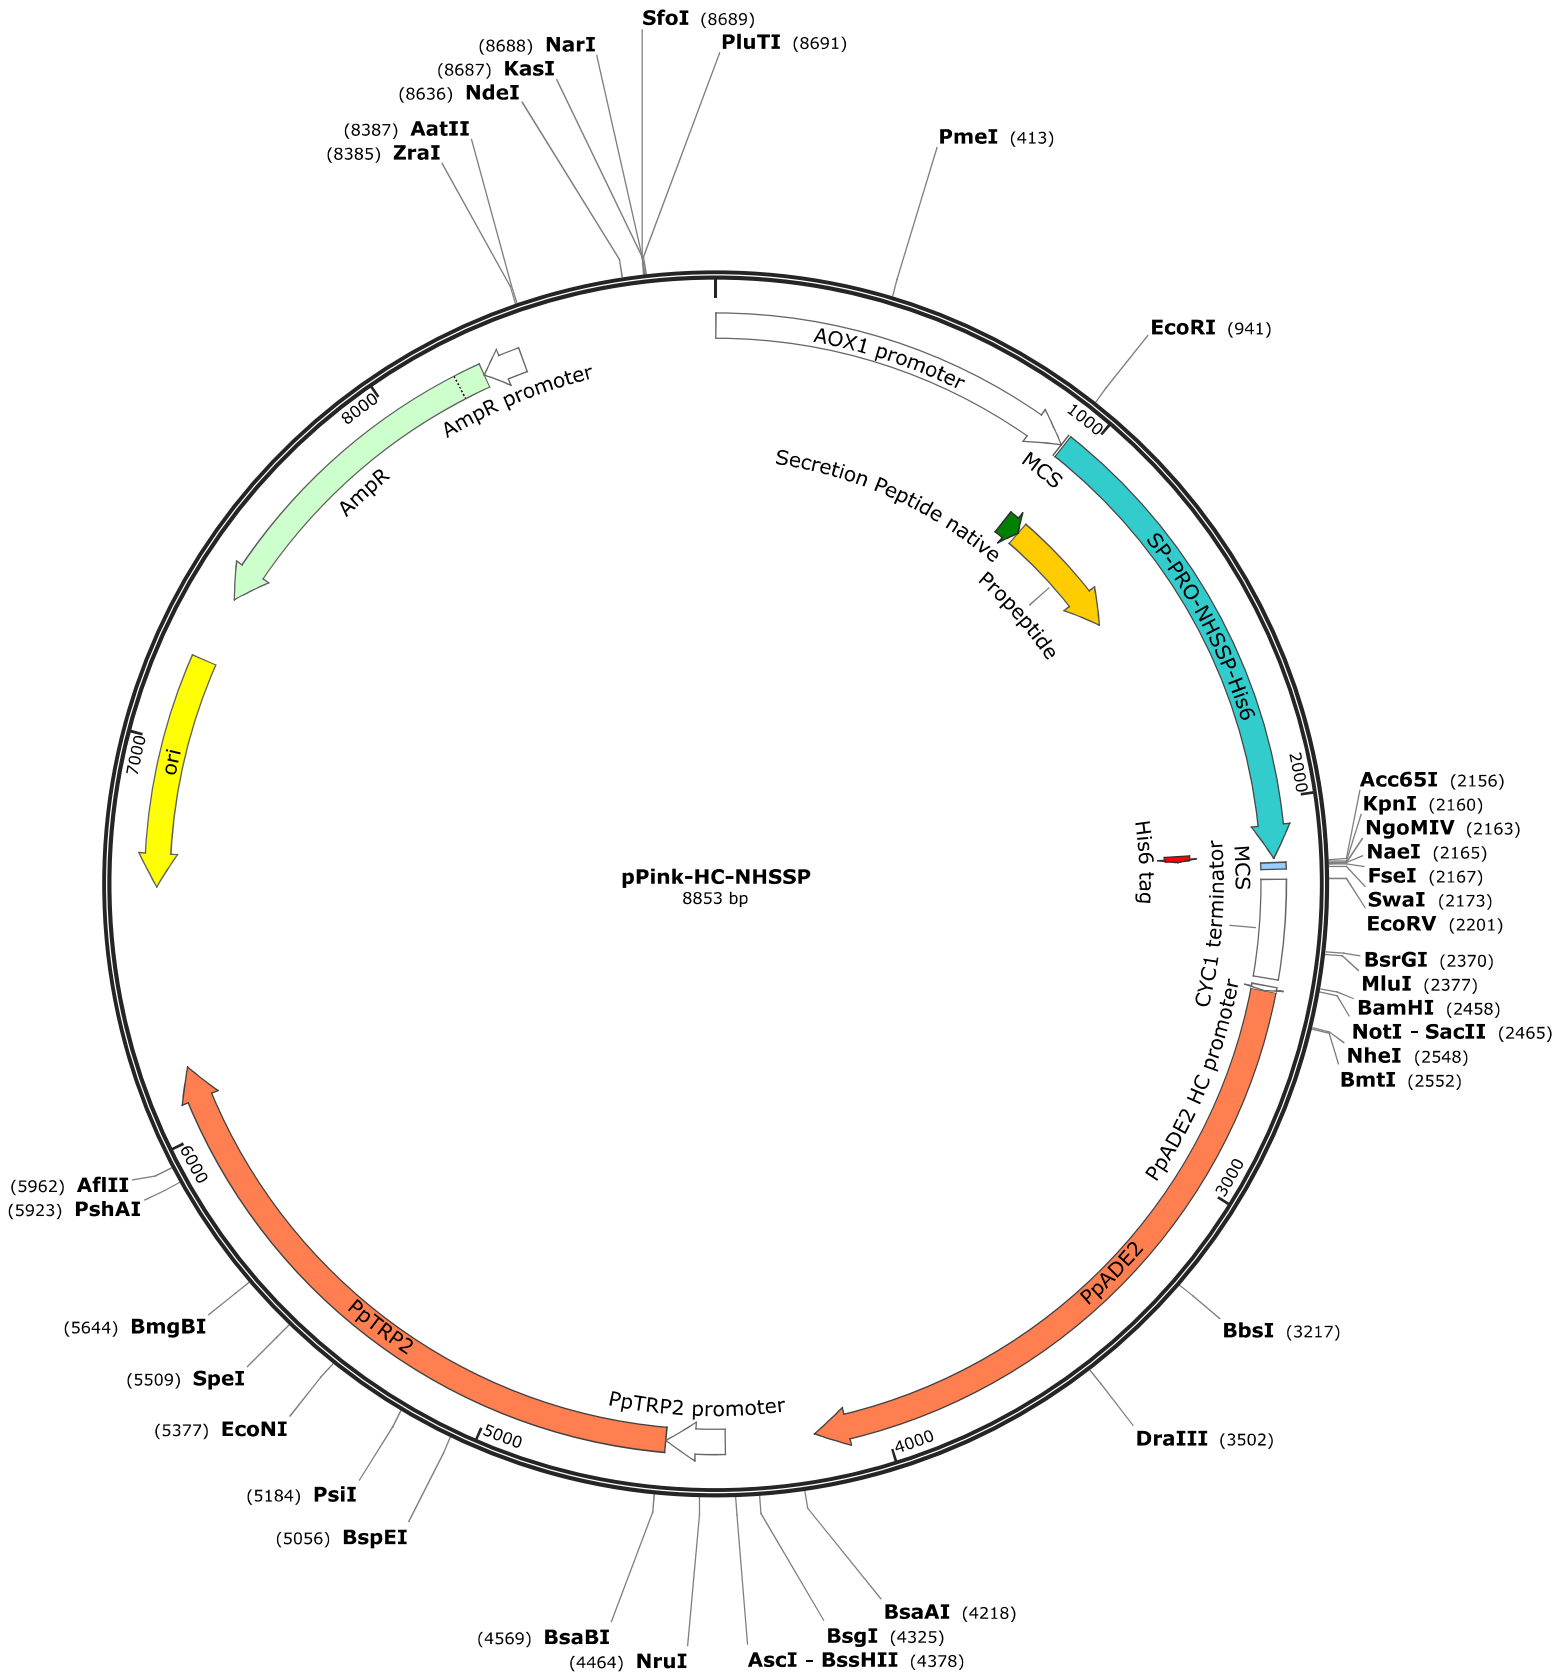

Supplement: 12934_2020_1392_MOESM5_ESM.pdf [file 12934_2020_1392_MOESM5_ESM.pdf]
