# Supplementary material for: An alternative for proteinase K-heat-sensitive protease from fungus Onygena corvina for biotechnology: cloning, engineering, expression, characterization and special application for protein sequencing
Source: PubMed Central journal article supplement (PMC7313183; doi:10.1186/s12934-020-01392-3), 2020-06-24
Supplement: 12934_2020_1392_MOESM12_ESM.pdf [file 12934_2020_1392_MOESM12_ESM.pdf]

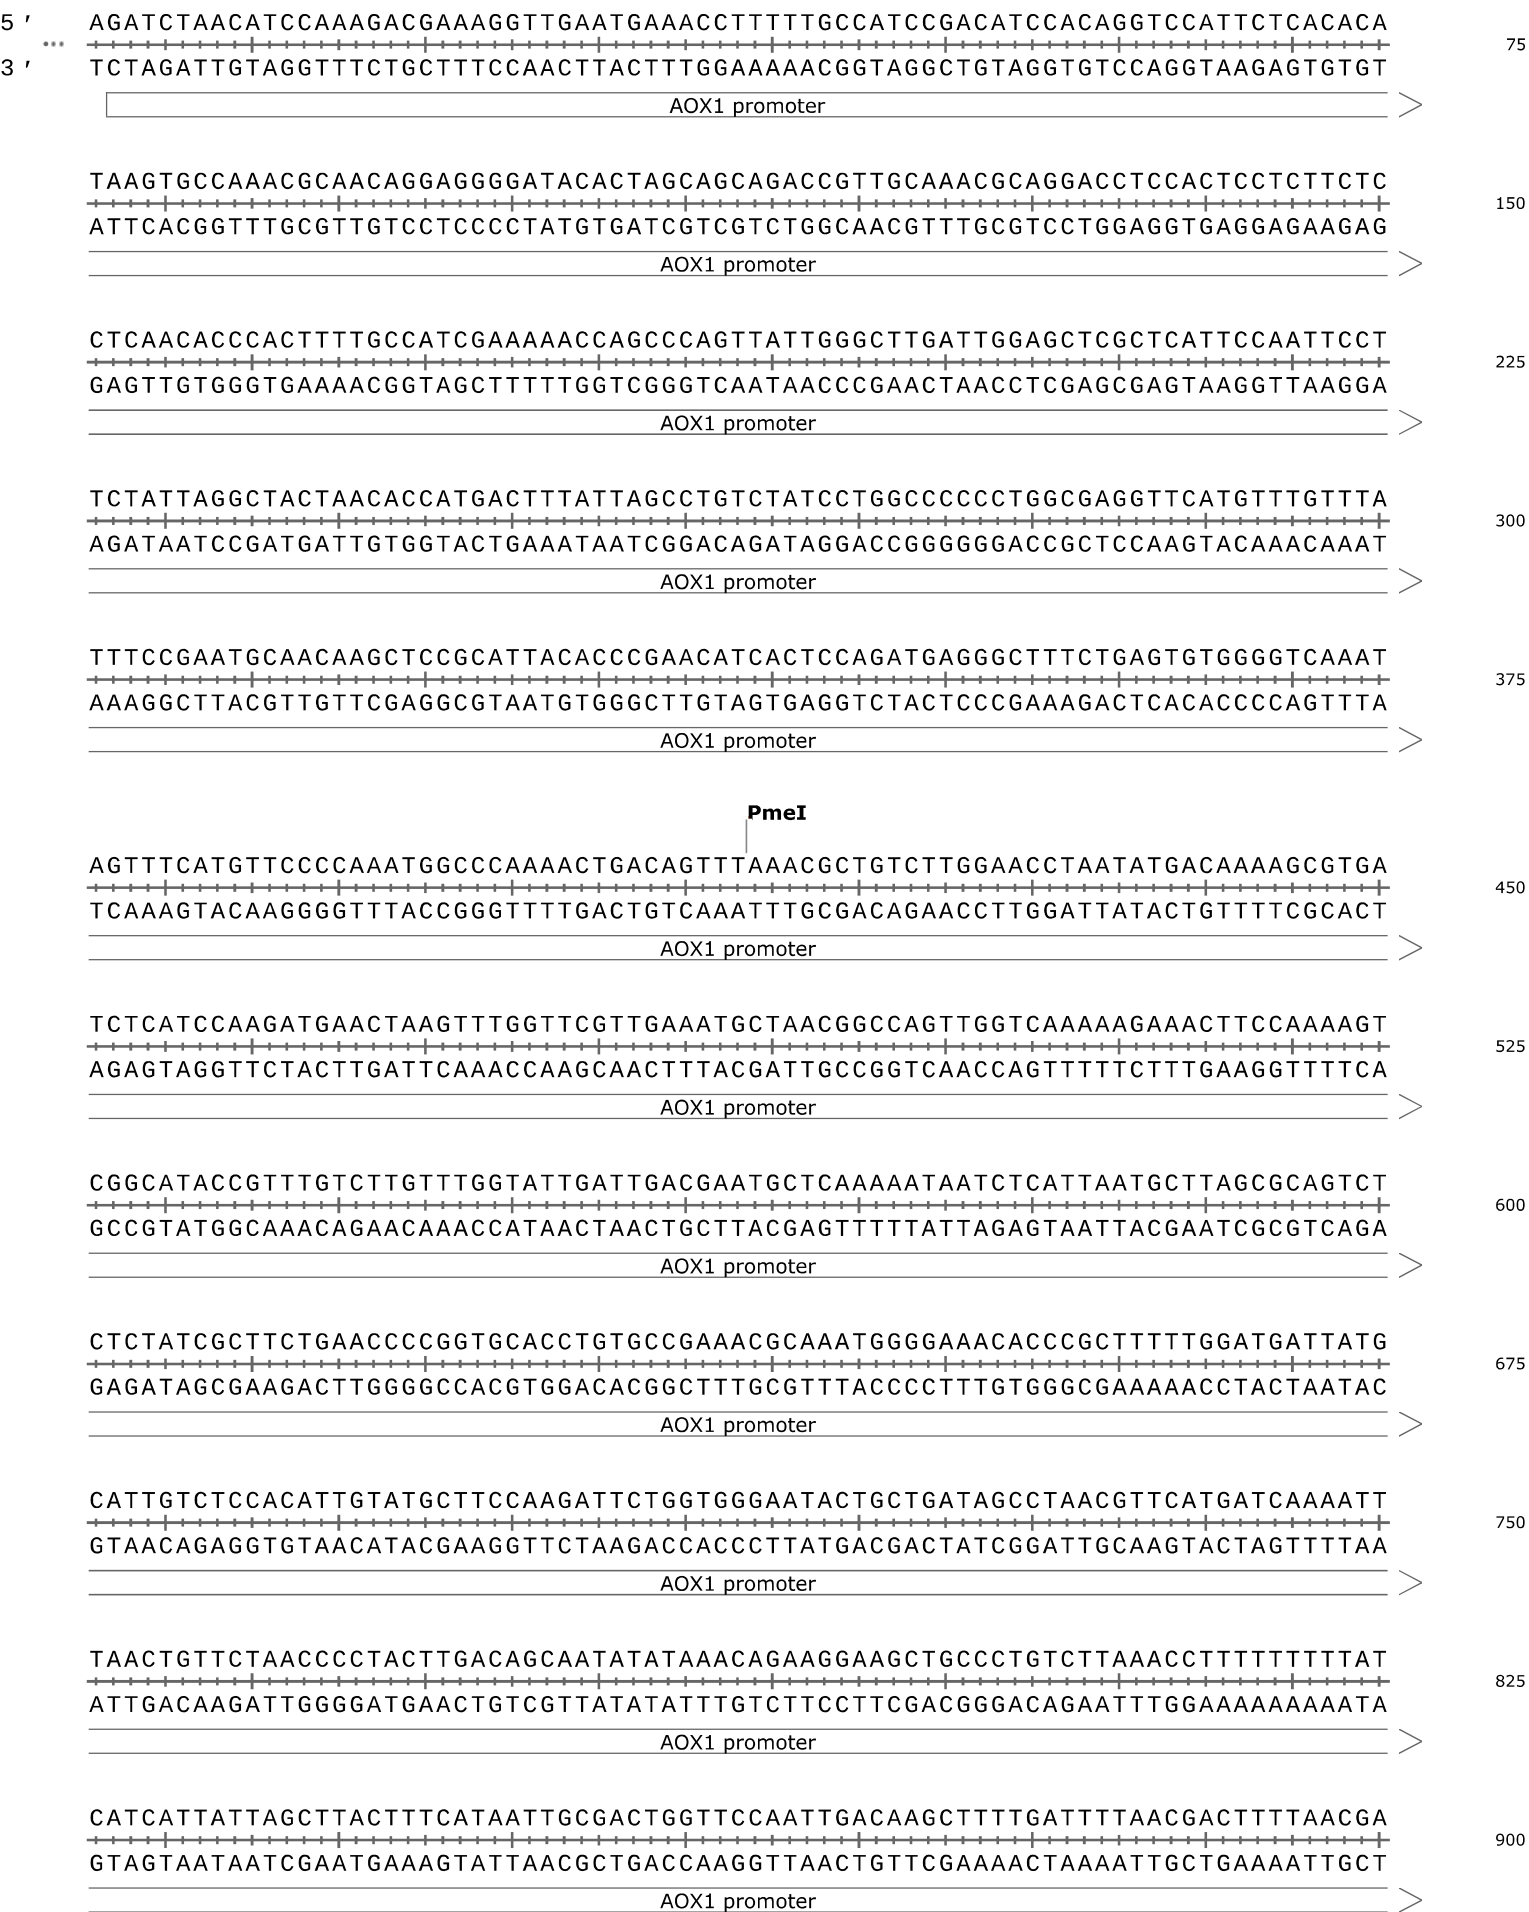

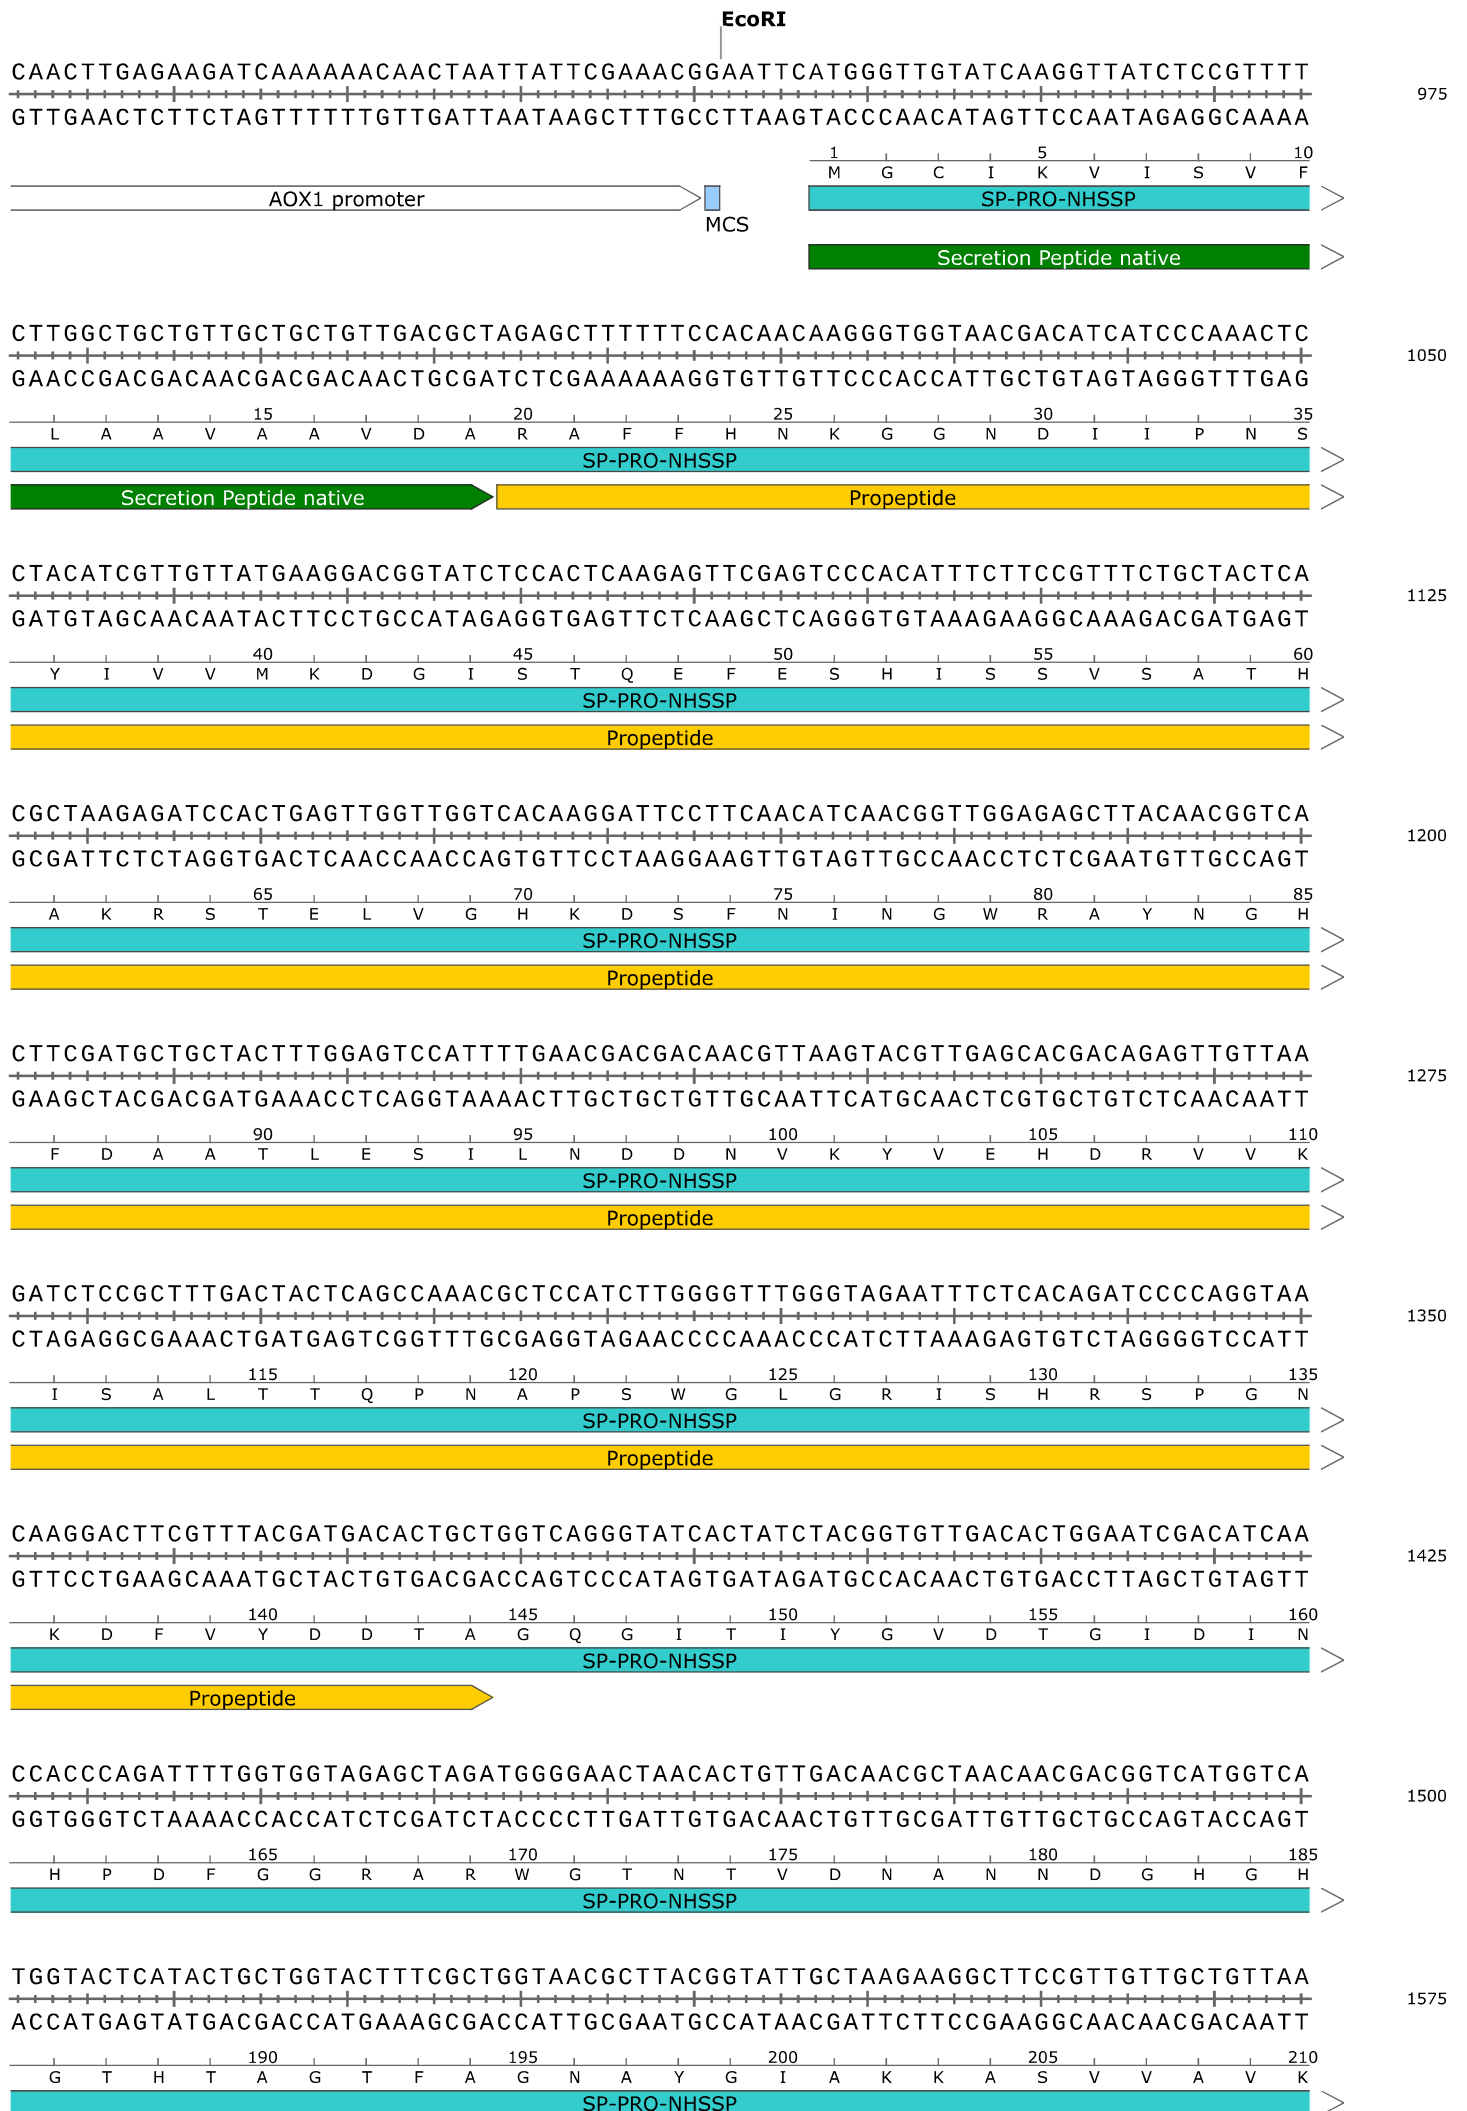



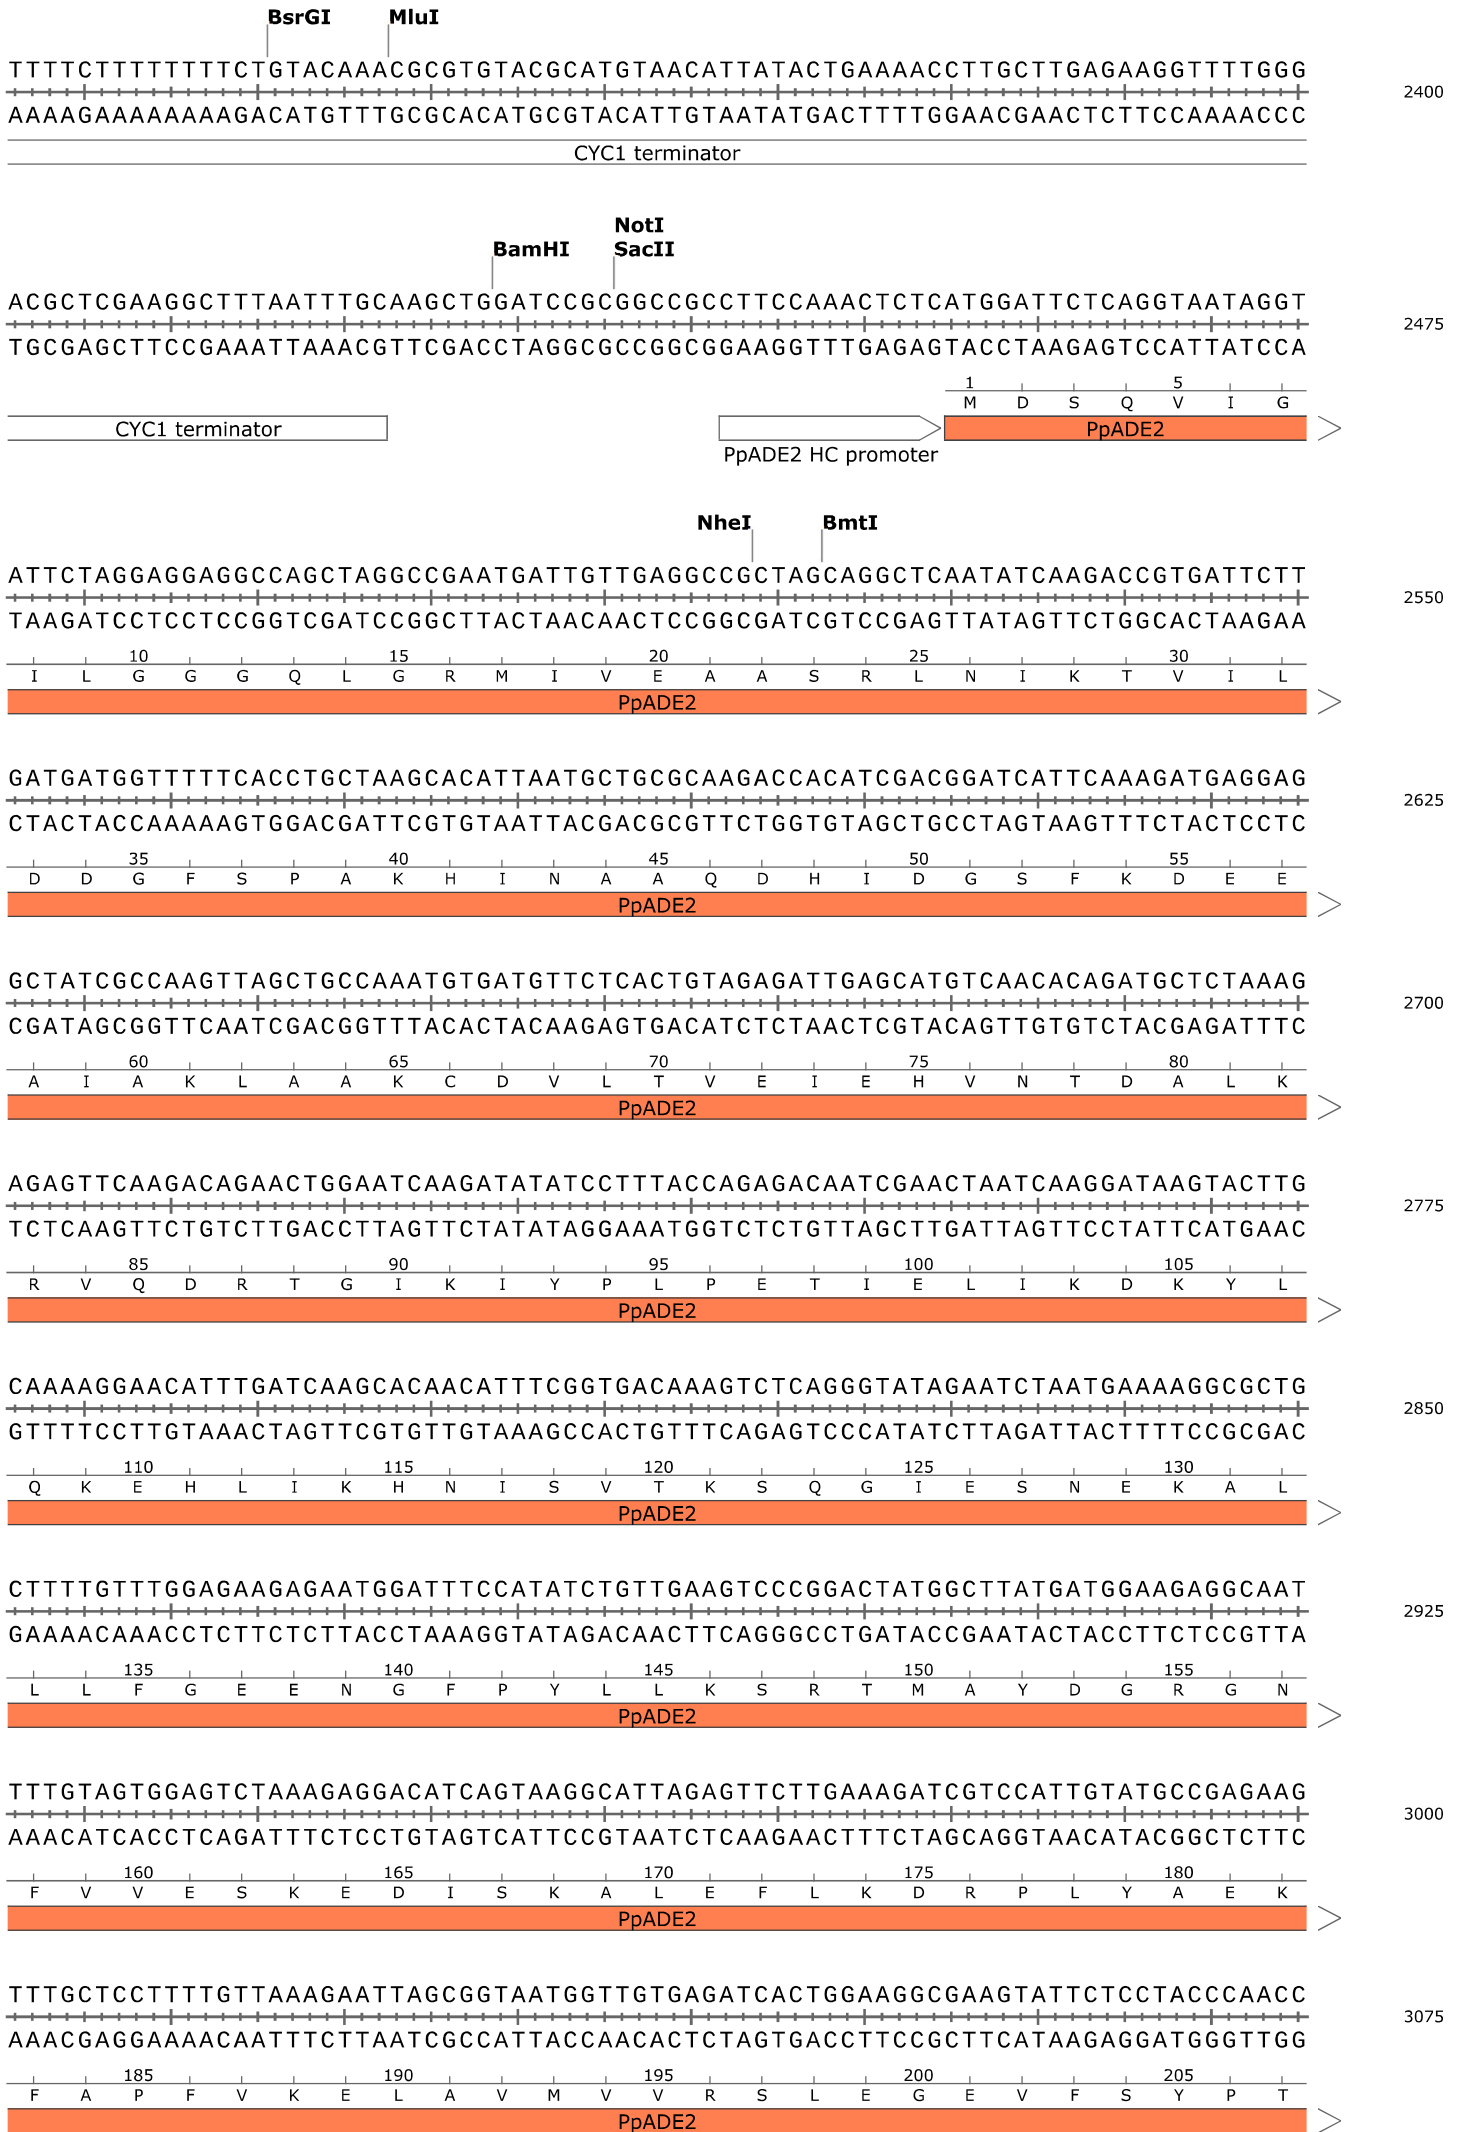

GTAGAAACTGTGCACAAGGACAATATCTGTCATATTGTGTATGCTCCGGCCAGAGTTAATGACACCATCCAAAAG  
 CATCTTTGACACGTGTTCTCTGTTATAGACAGTATAACACATACGAGGCCGGTCTCAATTACTGTGGTAGGTTTTTC

3150

V E T V H K D N I C H I V Y A P A R V N D T I Q K  
 PpADE2

**BbsI**

AAAGCTCAATATTAGCTGAAAACACTGTGAAGACTTTCCAGGCGCTGGAATCTTCGGAGTTGAGATGTTTCTA  
 TTTTCGAGTTTATAATCGACTTTTGTGACACTTCTGAAAGGGTCCGCGACCTTAGAAGCCTCAACTCTACAAGGAT

3225

K A Q I L A E N T V K T F P G A G I F G V E M F L  
 PpADE2

TTGTCTGATGGAGAACTTCTTGAAATGAGATTGCTCCAAGGCCCCACAATTCTGGTCACTATACAATCGATGCA  
 AACAGACTACCTCTTGAAGAACATTTACTCTAACGAGGTTCCGGGGTGTAAAGACCAGTGATATGTTAGCTACGT

3300

L S D G E L L V N E I A P R P H N S G H Y T I D A  
 PpADE2

TGTGTAACATCTCAGTTTGAAGCACATGTAAGAGCCATAACTGGTCTGCCAATGCCACTAGATTTACCAAACCTA  
 ACACATTGTAGAGTCAAGCTTCGTGTACATTCTCGGTATTGACCAGACGGTTACGGTGATCTAAAGTGGTTTTGAT

3375

C V T S Q F E A H V R A I T G L P M P L D F T K L  
 PpADE2

TCTACTTCCAACACCAACGCTATTATGCTCAATGTTTTGGGTGCTGAAAAATCTCACGGGGAATTAGAGTTTTGT  
 AGATGAAGGTTGTGGTTGCGATAATACGAGTTACAAAACCCACGACTTTTTAGAGTGCCCTTAATCTCAAAAACA

3450

S T S N T N A I M L N V L G A E K S H G E L E F C  
 PpADE2

**DraIII**

AGAAGAGCCTTAGAAACACCCGGTCTTCTGTATATCTGTACGGAAAGACCACCCGATTGGCTCGTAAGATGGGT  
 TCTTCTCGGAATCTTTGTGGGCCACGAAGACATATAGACATGCCTTTCTGGTGGGCTAACCGAGCATTCTACCCA

3525

R R A L E T P G A S V Y L Y G K T T R L A R K M G  
 PpADE2

CATATCAACATAATAGGATCTTCCATGTTGGAAGCAGAACAAAAGTTAGAGTACATTCTAGAAGAATCAACCCAC  
 GTATAGTTGTATTATCCTAGAAGGTACAACCTTCGTCTTGTTTTCAATCTCATGTAAGATCTTCTTAGTTGGGTG

3600

H I N I I G S S M L E A E Q K L E Y I L E E S T H  
 PpADE2

TTACCATCCAGTACTGTATCAGCTGACACTAAACCGTTGGTTGGAGTTATCATGGGTTTCAGACTCTGATCTACCT  
 AATGGTAGGTCATGACATAGTCGACTGTGATTTGGCAACCAACCTCAATAGTACCCAAGTCTGAGACTAGATGGA

3675

L P S S T V S A D T K P L V G V I M G S D S D L P  
 PpADE2

GTGATTTTCAAAGGTTGCGATATTTTAAAACAGTTTGGTGTTCATTTCGAAGTTACTATTGTCTCTGCTCATAGA  
 CACTAAAGCTTTCCAACGCTATAAAATTTTGTCAAACCACAAGGTAAGCTTCAATGATAACAGAGACGAGTATCT

3750

V I S K G C D I L K Q F G V P F E V T I V S A H R  
 PpADE2

ACACCACAGAGAATGACCAGATATGCCTTTGAAGCCGCTAGTAGAGGTATCAAGGCTATCATTGCAGGTGCTGGT  
 TGTGGTGTCTCTTACTGGTCTATACGGAAACTTCGGCGATCATCTCCATAGTTCCGATAGTAACGTCCACGACCA

3825

T P Q R M T R Y A F E A A S R G I K A I I A G A G  
 PpADE2

GGTGCTGCTCATCTTCCAGGAATGGTTGCTGCCATGACTCCGTTGCCAGTCATTGGTGTTCCTGTCAAGGGCTCT  
CCACGACGAGTAGAAGGTCCTTACCAACGACGGTACTGAGGCAACGGTCAGTAACCACAAGGACAGTTCCCGAGA

3900

G A A H L P G M V A A M T P L P V I G V P V K G S  
PpADE2

ACGTTGGATGGTGTAGACTCGCTACACTCGATTGTCCAAATGCCTAGAGGTGTTCTGTGGCTACGGTTGCTATC  
TGCAACCTACCACATCTGAGCGATGTGAGCTAACAGGTTTACGGATCTCCACAAGGACACCGATGCCAACGATAG

3975

T L D G V D S L H S I V Q M P R G V P V A T V A I  
PpADE2

AACAACGCCACCAATGCCGCTCTGTTGGCCATCAGGATTTTAGGTACAATTGACCACAAATGGCAAAGGAAATG  
TTGTTGCGGTGGTTACGGCGAGACAACCGGTAGTCTTAAATCCATGTTAACTGGTGTTTACCGTTTTCTTTAC

4050

N N A T N A A L L A I R I L G T I D H K W Q K E M  
PpADE2

TCCAAGTATATGAATGCAATGGAGACCGAAGTGTGGGGAAGGCATCCAACCTGGAATCTGAAGGGTATGAATCC  
AGGTTTCATATACTTACGTTACCTCTGGCTTCACAACCCCTTCCGTAGGTTGAACCTTAGACTTCCATACTTAGG

4125

S K Y M N A M E T E V L G K A S N L E S E G Y E S  
PpADE2

BsaAI

TATTTGAAGAATCGTCTTTGAATTTAGTATTGTTTTTAAATAGATGTATATATAATAGTACACGTAACCTTATCTA  
ATAAACTTCTTAGCAGAAACTTAAATCATAACAAAAAATTATCTACATATATATTATCATGTGCATTGAATAGAT

4200

Y L K N R L  
PpADE2

TTCCATTATAATTTTATTTTAAAGGTTCCGGTAGAAATTTGTCTCCAAAAAGTTGGTTAGAGCCTGGCAGTTTT  
AAGGTAAGTATTAATAAAATTTCCAAGCCATCTTTAAACAGGAGGTTTTTCAACCAATCTCGGACCGTCAAAA

4275

BsgI

AscI  
BssHII

GATAGGCATTATTATAGATTGGGTAATATTTACCCTGCACCTGGAGGAACCTTTGCAAAGAGCCTCATGTGCGGGC  
CTATCCGTAATAATATCTAACCCATTATAAATGGGACGTGGACCTCCTTGAAACGTTTCTCGGAGTACACGCCGC

4350

CGCCAGGCCATAATGGCCAAACGGTTTCTCAATTACTATATACTACTAACCATTTACCTGTAGCGTATTTCTTTT  
GCGGTCCGGTATTACCGGTTTGCCAAAGAGTTAATGATATATGATGATTGGTAAATGGACATCGCATAAAGAAAA

4425

PpTRP2 promoter

NruI

CCCTCTTCGCGAAAGCTCAAGGGCATCTTCTTGACTCATGAAAAATATCTGGATTTCTTCTGACAGATCATCACC  
GGGAGAAGCGCTTTCGAGTTCCCGTAGAAGAACTGAGTACTTTTTATAGACCTAAAGAAGACTGTCTAGTAGTGG

4500

PpTRP2 promoter

BsaBI

CTTGAGCCCAACTCTCTAGCCTATGAGTGTAAGTGATAGTCATCTTGCAACAGATTATTTTGGAACGCAACTAAC  
GAACTCGGGTTGAGAGATCGGATACTCACATTCATCAGTAGAACGTTGTCTAATAAAACCTTGC GTTGATTG

4575

M S V S D S H L A T D Y F G T Q L T  
PpTRP2 promoter PpTRP2

AAAGCAGATACACCCTTCAGCAGAATCCTTTCTGGATATTGTGAAGAATGATCGCCAAAGTCACAGTCCTGAGAC  
TTTCGTCTATGTGGGAAGTCGTCTTAGGAAAGACCTATAACACTTCTTACTAGCGTTTCAGTGTGTCAGGACTCTG

4650

K Q I H P S A E S F L D I V K N R Q S H S P E T  
PpTRP2

AGTTCCTAATCTTTACCCCATTTACAAGTTCATCCAATCAGACTTCTTAACGCCTCATCTGGCTTATATCAAGCT  
TCAAGGATTAGAAATGGGGTAAATGTTCAAGTAGGTTAGTCTGAAGAATTGCGGAGTAGACCGAATATAGTTCTGA

4725

V P N L Y P I Y K F I Q S D F L T P H L A Y I K L  
PpTRP2

TACCAACAGTTCAGAACTCCCAGTCCAAGTTTCTTGCTTGAAAGTGCGAAGAATGGTGACACCGTTGACAGGTA  
ATGGTTGTCAAGTCTTTGAGGGTCAGGTTCAAAGAACGAACCTTTCACGCTTCTTACCCTGTGGCAACTGTCCAT

4800

T N S S E T P S P S F L L E S A K N G D T V D R Y  
PpTRP2

CACCTTTATGGGACATTCCTCCAGAAAAATAATCAAGACTGGGCCTTTAGAGGGTGTGAAGTTGACCCCTTGGT  
GTGGAAATACCCTGTAAGGGGGTCTTTTTATTAGTTCTGACCCGAAATCTCCACGACTTCAACTGGGGAACCA

4875

T F M G H S P R K I I K T G P L E G A E V D P L V  
PpTRP2

GCTTCTGGAAAAAGAACTGAAGGGCACCAAGCAACTTCTGGTATTCTCTCGTCTAAGTGGTGGTGCAT  
CGAAGACCTTTTTCTTGACTTCCCGTGGTCTGTTTCGCGTTGAAGGACCATAAGGAGCAGATTACCACCACGGTA

4950

L L E K E L K G T R Q A Q L P G I P R L S G G A I  
PpTRP2

AGGATACATCTCGTACGATTGTATTAAGTACTTTGAACCAAAAAGTAAAGAAAAGTAAAGATGTTTTGCAACT  
TCCTATGTAGAGCATGCTAACATAATTCATGAACTTGGTTTTGACTTTCTTTTACTTTCTACAAAACGTTGA

5025

G Y I S Y D C I K Y F E P K T E R K L K D V L Q L  
PpTRP2

**BspEI**

TCCGGAAGCAGCTTTGATGTTGTTTCGACACGATCGTGGCTTTTGACAATGTTTATCAAAGATTCCAGGTAATTGG  
AGGCCTTCGTCGAAACTACAACAAGCTGTGCTAGCACCGAAAAGTGTACAAATAGTTTCTAAGGTCCATTAACC

5100

P E A A L M L F D T I V A F D N V Y Q R F Q V I G  
PpTRP2

**PsiI**

AAACGTTTCTCTATCCGTTGATGACTCGGACGAAGCTATTCTTGAGAAATATTATAAGACAAGAGAAGAAGTGG  
TTTGCAAAGAGATAGGCAACTACTGAGCCTGCTTCGATAAGAACTCTTTATAATATTCTGTTCTCTTCTCACCT

5175

N V S L S V D D S D E A I L E K Y Y K T R E E V E  
PpTRP2

AAAGATCAGTAAAGTGGTATTTGACAATAAAAAGTTCCTACTATGAACAGAAAGATATTATTCAAGGCCAAAC  
TTTCTAGTCATTTACCATAAACTGTTATTTTGACAAGGGATGATACTTGTCTTTCTATAATAAGTTCCGGTTTG

5250

K I S K V V F D N K T V P Y Y E Q K D I I Q G Q T  
PpTRP2

GTTACCTCTAATATTGGTCAGGAAGGGTATGAAAACCATGTTTCGCAAGCTGAAAGAACATATTCTGAAAGGAGA  
CAAGTGGAGATTATAACCAGTCTTCCCATACTTTTGGTACAAGCGTTCGACTTCTTGTATAAGACTTTCCTCT

5325

F T S N I G Q E G Y E N H V R K L K E H I L K G D  
PpTRP2

**EcoNI**

CATCTTCCAAGCTGTTCCCTCTCAAAGGGTAGCCAGGCCGACCTCATTGCACCCTTTCAACATCTATCGTCATTT  
 GTAGAAGGTTTCGACAAGGGAGAGTTTCCCATCGGTCCGGCTGGAGTAACGTGGGAAAGTTGTAGATAGCAGTAAA

270 275 280 285 290  
 I F Q A V P S Q R V A R P T S L H P F N I Y R H L

PpTRP2

5400

GAGAACTGTCAATCCTTCTCCATACATGTTCTATATTGACTATCTAGACTTCCAAGTTGTTGGTGCTTCACCTGA  
 CTCTTGACAGTTAGGAAGAGGTATGTACAAGATATAACTGATAGATCTGAAGGTTCAACAACCACGAAGTGGACT

295 300 305 310 315  
 R T V N P S P Y M F Y I D Y L D F Q V V G A S P E

PpTRP2

5475

**SpeI**

ATTACTAGTTAAATCCGACAACAACAACAAAATCATCACACATCCTATTGCTGGAACCTTTCCAGAGGTAAAAC  
 TAATGATCAATTTAGGCTGTTGTTGTTGTTTGTAGTGTGTAGGATAACGACCTTGAGAAGGGTCTCCATTTTG

320 325 330 335 340  
 L L V K S D N N N K I I T H P I A G T L P R G K T

PpTRP2

5550

**BmgBI**

TATCGAAGAGGACGACAATTATGCTAAGCAATTGAAGTCGTCTTTGAAAGACAGGGCCGAGCACGTCATGCTGGT  
 ATAGCTTCTCCTGCTGTTAATACGATTCGTTAACTTCAGCAGAACTTTCTGTCCCGGCTCGTGCAGTACGACCA

345 350 355 360 365  
 I E E D D N Y A K Q L K S S L K D R A E H V M L V

PpTRP2

5625

AGATTTGGCCAGAAATGATATTAACCGTGTGTGTGAGCCACCAGTACCACGGTTGATCGTTTATTGACTGTGGA  
 TCTAAACCGGTCTTTACTATAATTGGCACACACACTCGGGTGGTCATGGTGCCAACCTAGCAAATAACTGACACCT

370 375 380 385 390  
 D L A R N D I N R V C E P T S T T V D R L L T V E

PpTRP2

5700

GAGATTTTCTCATGTGATGCATCTTGTGTCAGAAGTCAGTGGAAACATTGAGACCAAACAAGACTCGCTTCGATGC  
 CTCTAAAAGAGTACACTACGTAGAACACAGTCTTCAGTCACCTTGTAACTCTGGTTTGTCTGAGCGAAGCTACG

395 400 405 410 415  
 R F S H V M H L V S E V S G T L R P N K T R F D A

PpTRP2

5775

TTTCAGATCCATTTTCCCAGCAGGAACCGTCTCCGGTGCTCCGAAGGTAAGAGCAATGCAACTCATAGGAGAATT  
 AAAGTCTAGGTAAAAGGGTCGTCTTGGCAGAGGCCACGAGGCTTCCATTCTCGTTACGTTGAGTATCCTCTTAA

420 425 430 435 440  
 F R S I F P A G T V S G A P K V R A M Q L I G E L

PpTRP2

5850

**PshAI**

GGAAGGAGAAAAGAGAGGTGTTTATGCGGGGGCCGTAGGACACTGGTTCGTACGATGGAAAATCGATGGACACATG  
 CCTTCTCTTTTCTCTCCACAAATACGCCCCCGGCATCCTGTGACCAGCATGCTACCTTTTAGCTACCTGTGTAC

445 450 455 460 465  
 E G E K R G V Y A G A V G H W S Y D G K S M D T C

PpTRP2

5925

**AflII**

TATTGCCTTAAGAACAATGGTCGTCAAGGACGGTGTGCTTACCTTCAAGCCGGAGGTGGAATTGTCTACGATTC  
 ATAACGGAATTCTTGTACCAGCAGTTCTGCCACAGCGAATGGAAGTTCGGCCTCCACCTTAACAGATGCTAAG

470 475 480 485 490  
 I A L R T M V V K D G V A Y L Q A G G G I V Y D S

PpTRP2

6000



TGACCCCTATGACGAGTACATCGAAACCATGAACAAAATGAGATCCAACAATAACACCATCTTGGAGGCTGAGAA  
ACTGGGGATACTGCTCATGTAGCTTTGGTACTTGTTTTACTCTAGGTTGTTATTGTGGTAGAACCCTCCGACTCTT

6075

D P Y D E Y I E T M N K M R S N N T I L E A E K

PpTRP2

AATCTGGACCGATAGGTTGGCCAGAGACGAGAATCAAAGTGAATCCGAAGAAAACGATCAATGAACGGAGGACGT  
TTAGACCTGGCTATCCAACCGGTCTCTGCTCTTAGTTTCACTTAGGCTTCTTTTGCTAGTTACTTGCCTCCTGCA

6150

I W T D R L A R D E N Q S E S E E N D Q

PpTRP2

AAGTAGGAATTTATGGTTTGGCCATAATGGCCTAGCTTGGCGTAATCATGGTCATAGCTGTTTCCTGTGTGAAAT  
TTCATCCTTAAATACCAAACCGGTATTACCGGATCGAACCGCATTAGTACCAGTATCGACAAAGGACACACTTTA

6225

TGTTATCCGCTCACAATTCCACACAACATACGAGCCGGAAGCATAAAGTGTAAAGCCTGGGGTGCCTAATGAGTG  
ACAATAGGCGAGTGTTAAGGTGTGTTGTATGCTCGGCCTTCGTATTTACATTTTCGGACCCACGGATTACTCAC

6300

AGCTAACTCACATTAATTGCGTTGCGCTCACTGCCCGCTTTCAGTCGGGAAACCTGTCGTGCCAGCTGCATTA  
TCGATTGAGTGTAATTAACGCAACGCGAGTGACGGGCGAAAGGTCAGCCCTTTGGACAGCACGGTCGACGTAATT

6375

TGAATCGGCCAACGCGCGGGGAGAGGCGGTTTGCGTATTGGGCGCTCTTCCGCTTCTCGCTCACTGACTCGCTG  
ACTTAGCCGGTTGCGCGCCCTCTCCGCCAAACGCATAACCCGCGAGAAGGCGAAGGAGCGAGTGACTGAGCGAC

6450

CGCTCGGTCGTTCCGGCTGCGGCGAGCGGTATCAGCTCACTCAAAGGCGGTAATACGGTTATCCACAGAATCAGGG  
GCGAGCCAGCAAGCCGACGCCGCTCGCCATAGTCGAGTGAGTTTCCGCCATTATGCCAATAGGTGTCTTAGTCCC

6525

GATAACGCAGGAAAGAACATGTGAGCAAAAGGCCAGCAAAAGGCCAGGAACCGTAAAAAGGCCGCGTTGCTGGCG  
CTATTGCGTCCTTTCTTGTACACTCGTTTTCCGGTCGTTTTCCGGTCCTTGGCATTTTTCCGGCGCAACGACCGC

6600

TTTTTCCATAGGCTCCGCCCCCTGACGAGCATCACAAAATCGACGCTCAAGTCAGAGGTGGCGAAACCCGACA  
AAAAAGGTATCCGAGGCGGGGGACTGCTCGTAGTGTTTTTAGCTGCGAGTTCAGTCTCCACCGCTTTGGGCTGT

6675

ori

GGACTATAAAGATACCAGGCGTTTTCCCCCTGGAAGCTCCCTCGTGCGCTCTCCTGTTCCGACCCCTGCCGCTTACC  
CCTGATATTTCTATGGTCCGCAAAGGGGGACCTTCGAGGGAGCACGCGAGAGGACAAGGCTGGGACGGCGAATGG

6750

ori

GGATACCTGTCCGCTTTTCTCCCTTCGGGAAGCGTGGCGCTTTTCTCATAGCTCACGCTGTAGGTATCTCAGTTCCG  
CCTATGGACAGGCGGAAAGAGGGAAAGCCCTTCGCACC GCGAAAGAGTATCGAGTGCGACATCCATAGAGTCAAGC

6825

ori

GTGTAGGTCGTTCCGCTCCAAGCTGGGCTGTGTGCACGAACCCCGTTTCAGCCCGACCGCTGCGCCTTATCCGGT  
CACATCCAGCAAGCGAGGTTTCGACCCGACACACGTGCTTGGGGGGCAAGTCGGGCTGGCGACGCGGAATAGGCCA

6900

ori

AACTATCGTCTTGAGTCCAACCCGGTAAGACACGACTTATCGCCACTGGCAGCAGCCACTGGTAACAGGATTAGC  
TTGATAGCAGAACTCAGGTTGGGCCATTCTGTGCTGAATAGCGGTGACCGTCTGTCGGTGACCATTGTCCTAATCG

6975

ori

AGAGCGAGGTATGTAGGCGGTGCTACAGAGTTCTTGAAGTGGTGGCCTAACTACGGCTACACTAGAAGGACAGTA  
TCTCGCTCCATACATCCGCCACGATGTCTCAAGAACTTACCACCGGATTGATGCCGATGTGATCTTCTGTGCTAT

7050

ori

TTTGGTATCTGCGCTCTGCTGAAGCCAGTTACCTTCGGAAAAAGAGTTGGTAGCTCTTGATCCGGCAAACAACC  
 AAACCATAGACGCGAGACGACTTCGGTCAATGGAAGCCTTTTTCTCAACCATCGAGAAGTAGGCCGTTTGTGG

7125

ori

ACCGCTGGTAGCGGTGGTTTTTTTTGTTTGAAGCAGCAGATTACGCGCAGAAAAAAGGATCTCAAGAAGATCCT  
 TGGCGACCATCGCCACCAAAAAACAAACGTTCTGCTCTAATGCGCGTCTTTTTTCTAGAGTTCTTCTAGGA

7200

ori

TTGATCTTTTCTACGGGGTCTGACGCTCAGTGAACGAAAACCTCACGTTAAGGGATTTTGGTCATGAGATTATCA  
 AACTAGAAAAGATGCCCCAGACTGCGAGTCACCTTGCTTTTGAGTGCAATTCCTAAAACCAGTACTCTAATAGT

7275

AAAAGGATCTTCACCTAGATCCTTTTAAATTAATAATGAAGTTTTAAATCAATCTAAAGTATATATGAGTAACT  
 TTTTCTAGAAGTGGATCTAGGAAAATTTAATTTTTACTTCAAATTTAGTTAGATTTTCATATATACTCATTTGA

7350

TGGTCTGACAGTTACCAATGCTTAATCAGTGAGGCACCTATCTCAGCGATCTGTCTATTTTCGTTTCATCCATAGTT  
 ACCAGACTGTCAATGGTTACGAATTAGTCACTCCGTGGATAGAGTCGCTAGACAGATAAAGCAAGTAGGTATCAA

7425

285 280 275 270  
 \* W H K I L S A G I E A Q R N R E D M T  
 AmpR

GCCTGACTCCCCGTCGTGTAGATAACTACGATACGGGAGGGCTTACCATCTGGCCCCAGTGCTGCAATGATACCG  
 CGGACTGAGGGGCAGCACATCTATTGATGCTATGCCCTCCCGAATGGTAGACCGGGGTCACGACGTTACTATGGC

7500

265 260 255 250 245  
 A Q S G T T Y I V V I R S P K G D P G L A A I I G  
 AmpR

CGAGACCCACGCTCACCGGCTCCAGATTTATCAGCAATAAACCAGCCAGCCGGAAGGGCCGAGCGCAGAAGTGGT  
 GCTCTGGGTGCGAGTGGCCGAGGTCTAAATAGTCGTTATTTGGTTCGGCTCGGCCTTCCCGGCTCGCGTCTTCACCA

7575

240 235 230 225 220  
 R S G R E G A G S K D A I F W G A P L A S R L L P  
 AmpR

CCTGCAACTTTATCCGCCTCCATCCAGTCTATTAATTGTTGCCGGGAAGCTAGAGTAAGTAGTTTCGCCAGTTAAT  
 GGACGTTGAAATAGGCGGAGGTAGGTCAGATAATTAACAACGGCCCTTCGATCTCATTTCATCAAGCGGTCAATTA

7650

215 210 205 200 195  
 G A V K D A E M W D I L Q Q R S A L T L L E G T L  
 AmpR

AGTTTGCGCAACGTTGTTGCCATTGCTACAGGCATCGTGGTGTACGCTCGTCTGTTTGGTATGGCTTCATTACGC  
 TCAAACGCGTTGCAACAACGGTAACGATGTCCGTAGCACCACAGTGCAGCAGCAAACCATAACCGAAGTAAGTCG

7725

190 185 180 175 170  
 L K R L T T A M A V P M T T D R E D N P I A E N L  
 AmpR

TCCGTTCCCAACGATCAAGGCGAGTTACATGATCCCCATGTTGTGCAAAAAAGCGTTAGCTCCTTCGGTCTCT  
 AGGCCAAGGGTTGCTAGTTCGCTCAATGTACTAGGGGGTACAACACGTTTTTTTCGCCAATCGAGGAAGCCAGGA

7800

165 160 155 150 145  
 E P E W R D L R T V H D G M N H L F A T L E K P G  
 AmpR

CCGATCGTTGTCAGAAGTAAGTTGGCCGCGAGTGTATCACTCATGGTTATGGCAGCACTGCATAATTCTTCTACT  
 GGCTAGCAACAGTCTTCATTCAACCGGCGTCACAATAGTGAGTACCAATACCGTCGTGACGTATTAAGAGAATGA

7875

140 135 130 125 120  
 G I T T L L L N A A T N D S M T I A A S C L E R V  
 AmpR

GTCATGCCATCCGTAAGATGCTTTTCTGTGACTGGTGGAGTACTCAACCAAGTCATTCTGAGAATAGTGTATGCGG  
CAGTACGGTAGGCATTCTACGAAAAGACACTGACCACTCATGAGTTGGTTTCAGTAAGACTCTTATCACATACGCC

7950

T M G D T L H K E T V P S Y E V L D N Q S Y H I R

AmpR

CGACCGAGTTGCTCTTGCCCGGCGTCAATACGGGATAATACCGCGCCACATAGCAGAACTTTAAAAGTGCTCATC  
GCTGGCTCAACGAGAACGGGCCGAGTTATGCCCTATTATGGCGCGGTGTATCGTCTTGAAATTTTCACGAGTAG

8025

R G L Q E Q G A D I R S L V A G C L L V K F T S M

AmpR

ATTGGAAAACGTTCTTCGGGGCGAAAACCTCTCAAGGATCTTACCGCTGTTGAGATCCAGTTCGATGTAACCCACT  
TAACCTTTTGCAAGAAGCCCCGCTTTTGAGAGTTCCTAGAATGGCGACAACCTCTAGGTCAAGCTACATTGGGTGA

8100

M P F R E E P R F S E L I K G S N L D L E I Y G V

AmpR

CGTGCACCCAACCTGATCTTCAGCATCTTTTACTTTTACCAGCGTTTCTGGGTGAGCAAAAACAGGAAGGCAAAAT  
GCACGTGGGTGACTAGAAGTCGTAGAAAATGAAAGTGGTCGCAAAGACCCACTCGTTTTTGTCTTCCGTTTTTA

8175

R A G L Q D E A D K V K V L T E P H A F V P L C F

signal sequence

AmpR

GCCGCAAAAAGGGAATAAGGGCGACACGGAAATGTTGAATACTCATACTCTTCCTTTTTCAATATTATTGAAGC  
CGGCGTTTTTCCCTTATTCCCGCTGTGCCTTTACAACCTTATGAGTATGAGAAGGAAAAGTTATAATAACTTCCG

8250

A A F F P I L A V R F H Q I S M

signal sequence

AmpR promoter

AmpR

ATTTATCAGGGTTATTGTCTCATGAGCGGATACATATTTGAATGATTTAGAAAAATAAACAAATAGGGGTTCCG  
TAAATAGTCCCAATAACAGAGTACTCGCCTATGTATAAACCCTACATAAATCTTTTTATTTGTTTATCCCAAGGC

8325

AmpR promoter

ZraI AatII

CGCACATTTCCCGAAAAGTGCCACCTGACGTCTAAGAAACCATTATTATCATGACATTAACCTATAAAAATAGG  
GCGTGTAAGGGGCTTTTACGCGTGGACTGCAGATTCTTTGGTAATAATAGTACTGTAATTGGATATTTTTATCC

8400

AmpR promoter

CGTATCACGAGGCCCTTTCGTCTCGCGGTTTCGGTGATGACGGTGAAAACCTCTGACACATGCAGCTCCCGGAG  
GCATAGTGCTCCGGGAAAGCAGAGCGCGCAAAGCCACTACTGCCACTTTTGGAGACTGTGTACGTGAGGGCCTC

8475

ACGGTCACAGCTTGTCTGTAAGCGGATGCCGGGAGCAGACAAGCCCCTCAGGGCGCGTCAGCGGGTGTGGCGGG  
TGCCAGTGTCGAACAGACATTCGCCTACGGCCCTCGTCTGTTTCGGGCAGTCCCGCGCAGTCGCCACAACCGCCC

8550

NdeI

TGTCGGGGCTGGCTTAACTATGCGGCATCAGAGCAGATTGTAAGTACTGAGAGTGCACCATATGCGGTGTGAAATACCG  
ACAGCCCCGACCGAATTGATACGCCGTAGTCTCGTCTAACATGACTCTCACGTGGTATACGCCACACTTTATGGC

8625

KasI NarI SfoI PfuTI

CACAGATGCGTAAGGAGAAAATACCGCATCAGGCGCCATTTCGCCATTACAGGCTGCGCAACTGTTGGGAAGGGCGA  
GTGTCTACGCATTCTTTTATGGCGTAGTCCGCGGTAAGCGGTAAGTCCGACGCGTTGACAACCTTCCCGCT

8700

TCGGTGCGGGCCTCTTCGCTATTACGCCAGCTGGCGAAAGGGGGATGTGCTGCAAGGCGATTAAGTTGGGTAACG  
AGCCACGCCC GGAGAAGCGATAATGCGGTGACCGCTTTCCCCCTACACGACGTTCCGCTAATTCAACCCATTGC

CCAGGGTTTTCCAGTCACGACGTTGTAAAACGACGGCCAGTGAATTG 3 '  
GGTCCCAAAGGGTCAGTGCTGCAACATTTTGCTGCCGGTCACTTAAC 5 ' 8823
