# Supplementary material for: An alternative for proteinase K-heat-sensitive protease from fungus Onygena corvina for biotechnology: cloning, engineering, expression, characterization and special application for protein sequencing
Source: PubMed Central journal article supplement (PMC7313183; doi:10.1186/s12934-020-01392-3), 2020-06-24
Supplement: 12934_2020_1392_MOESM13_ESM.pdf [file 12934_2020_1392_MOESM13_ESM.pdf]

# **MASCOT Search Results**

## **Protein View: 349**

### **Prot-1 [agafab 20160316]**

**Database:** small-www  
**Score:** 9207  
**Nominal mass (M<sub>r</sub>):** 39892  
**Calculated pI:** 7.90

Sequence similarity is available as [an NCBI BLAST search of 349 against nr](#).

### **Search parameters**

**MS data file:** \\212.87.29.88\orbital\FA\03-marzec2016\60324460bro\_Prot-1.raw  
**Enzyme:** Trypsin: cuts C-term side of KR unless next residue is P.  
**Fixed modifications:** [Methylthio \(C\)](#)  
**Variable modifications:** [Oxidation \(M\)](#)

### **Protein sequence coverage: 35%**

Matched peptides shown in ***bold red***.

```

1 RAFFHNKGGN DIIPNSYIVV MKDGISTQEF ESHISSVSAT HAKRSTELVG
51 HKDSFNINGW RAYNGHFDAA TLESILNDDN VKYVEHDRVV KISALTTQPN
101 APSWGLGRIS HRSPGNKDFV YDDTAGQGIT IYGVDTGIDI NHPDFGGRAR
151 WGTNTVDNAN NDGHGHGTHT AGTFAGNAYG IAKKASVVAV KVLSASGSGS
201 NAGVIKGIDW CVTDARSKGA LGKAALNLSL GGGFNQATND AVTRAQTAGI
251 FVAVAAGNDN KDARNYSPAS APAVCTVASS TIDDQKSSFS NWGSIVDIYA
301 PGSNIISDAP GGGVRTMSGT SMASPHVCGA GAAMLAQGVP VGQVCDRLKQ
351 IGNAVVRNPG TSTTNRLLYN GSGQGSHHHH HH

```

Unformatted sequence string: [382 residues](#) (for pasting into other applications).

Sort peptides by  Residue Number  Increasing Mass  Decreasing Mass

Show predicted peptides also

| Query                | Star | En       | Observe      | Mr (expt)    | Mr (calc)    | ppm   | M <sub>e</sub> <sup>Score</sup> | Expect  | Rank           | U             | Peptide        |
|----------------------|------|----------|--------------|--------------|--------------|-------|---------------------------------|---------|----------------|---------------|----------------|
| <a href="#">4310</a> | 109  | -11<br>7 | 498.272<br>6 | 994.530<br>6 | 994.530<br>8 | -0.16 | 177                             | 2.1e-08 | 1Score<br>> 13 | indicat<br>es | UR.ISHRSPGNK.D |
| <a href="#">4311</a> | 109  | -11<br>7 | 332.517<br>5 | 994.530<br>7 | 994.530<br>8 | -0.14 | 137                             | 0.00021 | 1Score<br>> 13 | indicat<br>es | UR.ISHRSPGNK.D |



| Quer<br>y                        | Star<br>t | En<br>d  | Observe<br>d | Mr(expt<br>)  | Mr(calc<br>)  | ppm  | M <sup>Score</sup><br>e | Expect      | Rank          | U | Peptide                                     |
|----------------------------------|-----------|----------|--------------|---------------|---------------|------|-------------------------|-------------|---------------|---|---------------------------------------------|
| <a href="#">2487</a><br><u>0</u> | 151       | -18<br>3 | 832.380<br>0 | 3325.49<br>09 | 3325.48<br>86 | 0.72 | 047                     | 2.1e-<br>05 | indicat<br>es | U | R.WGTNTVDNANNDGHHGHGHTHTAGTFAGNAYG<br>IAK.K |
| 1Score<br>> 13<br>identit<br>y   |           |          |              |               |               |      |                         |             |               |   |                                             |
| <a href="#">2487</a><br><u>1</u> | 151       | -18<br>3 | 832.380<br>1 | 3325.49<br>15 | 3325.48<br>86 | 0.88 | 045                     | 2.9e-<br>05 | indicat<br>es | U | R.WGTNTVDNANNDGHHGHGHTHTAGTFAGNAYG<br>IAK.K |
| 1Score<br>> 13<br>identit<br>y   |           |          |              |               |               |      |                         |             |               |   |                                             |
| <a href="#">2487</a><br><u>3</u> | 151       | -18<br>3 | 832.380<br>3 | 3325.49<br>23 | 3325.48<br>86 | 1.11 | 044                     | 4.4e-<br>05 | indicat<br>es | U | R.WGTNTVDNANNDGHHGHGHTHTAGTFAGNAYG<br>IAK.K |
| 1Score<br>> 13<br>identit<br>y   |           |          |              |               |               |      |                         |             |               |   |                                             |
| <a href="#">2487</a><br><u>4</u> | 151       | -18<br>3 | 832.380<br>9 | 3325.49<br>47 | 3325.48<br>86 | 1.83 | 056                     | 2.8e-<br>06 | indicat<br>es | U | R.WGTNTVDNANNDGHHGHGHTHTAGTFAGNAYG<br>IAK.K |
| 1Score<br>> 13<br>identit<br>y   |           |          |              |               |               |      |                         |             |               |   |                                             |
| <a href="#">2487</a><br><u>5</u> | 151       | -18<br>3 | 832.381<br>1 | 3325.49<br>52 | 3325.48<br>86 | 1.99 | 042                     | 7.1e-<br>05 | indicat<br>es | U | R.WGTNTVDNANNDGHHGHGHTHTAGTFAGNAYG<br>IAK.K |
| 1Score<br>> 13<br>identit<br>y   |           |          |              |               |               |      |                         |             |               |   |                                             |

| Quer<br>y                                 | Star<br>t | En<br>d  | Observe<br>d | Mr(expt<br>)  | Mr(calc<br>)  | ppm   | M <sup>Scor</sup><br>e | Expect      | Rank                                            | U | Peptide                    |
|-------------------------------------------|-----------|----------|--------------|---------------|---------------|-------|------------------------|-------------|-------------------------------------------------|---|----------------------------|
| <a href="#">1519</a>                      | 184       | -19<br>1 | 401.263<br>6 | 800.512<br>7  | 800.512<br>0  | 0.86  | 186                    | 2.6e-<br>09 | 1Score<br>> 13<br>indicat<br>es<br>identit<br>y |   | UK.KASVVAVK.V              |
| <a href="#">9860</a>                      | 192       | -20<br>6 | 673.868<br>3 | 1345.72<br>20 | 1345.72<br>01 | 1.37  | 0148                   | 1.5e-<br>15 | 1Score<br>> 13<br>indicat<br>es<br>identit<br>y |   | UK.VLSASGSGSNAGVIK.G       |
| <a href="#">9861</a>                      | 192       | -20<br>6 | 673.868<br>5 | 1345.72<br>24 | 1345.72<br>01 | 1.69  | 0126                   | 2.3e-<br>13 | 1Score<br>> 13<br>indicat<br>es<br>identit<br>y |   | UK.VLSASGSGSNAGVIK.G       |
| <a href="#">1903</a><br><a href="#">9</a> | 224       | -24<br>4 | 697.357<br>3 | 2089.05<br>00 | 2089.05<br>52 | -2.49 | 042                    | 6.8e-<br>05 | 1Score<br>> 13<br>indicat<br>es<br>identit<br>y |   | UK.AALNLSLGGGFNQATNDAVTR.A |
| <a href="#">1904</a><br><a href="#">0</a> | 224       | -24<br>4 | 697.357<br>6 | 2089.05<br>09 | 2089.05<br>52 | -2.09 | 038                    | 0.0001<br>6 | 1Score<br>> 13<br>indicat<br>es<br>identit<br>y |   | UK.AALNLSLGGGFNQATNDAVTR.A |

| Query                            | Start | End      | Observed      | Mr (expt)     | Mr (calc)     | ppm    | M <sub>e</sub> Score | Expect      | Rank | U                     | Peptide                    |
|----------------------------------|-------|----------|---------------|---------------|---------------|--------|----------------------|-------------|------|-----------------------|----------------------------|
| <a href="#">1904</a><br><u>2</u> | 224   | -24<br>4 | 1045.53<br>30 | 2089.05<br>14 | 2089.05<br>52 | -1.81  | 0117                 | 2.1e-<br>12 | 13   | indicates<br>identity | UK.AALNLSLGGGFNQATNDAVTR.A |
| <a href="#">1904</a><br><u>3</u> | 224   | -24<br>4 | 1045.53<br>34 | 2089.05<br>22 | 2089.05<br>52 | -1.42  | 0112                 | 6.1e-<br>12 | 13   | indicates<br>identity | UK.AALNLSLGGGFNQATNDAVTR.A |
| <a href="#">1904</a><br><u>4</u> | 224   | -24<br>4 | 697.358<br>5  | 2089.05<br>37 | 2089.05<br>52 | -0.71  | 032                  | 0.0006<br>3 | 13   | indicates<br>identity | UK.AALNLSLGGGFNQATNDAVTR.A |
| <a href="#">1904</a><br><u>5</u> | 224   | -24<br>4 | 697.358<br>9  | 2089.05<br>49 | 2089.05<br>52 | -0.14  | 0112                 | 7e-12       | 13   | indicates<br>identity | UK.AALNLSLGGGFNQATNDAVTR.A |
| <a href="#">1904</a><br><u>6</u> | 224   | -24<br>4 | 1045.53<br>48 | 2089.05<br>50 | 2089.05<br>52 | -0.083 | 0107                 | 2.1e-<br>11 | 13   | indicates<br>identity | UK.AALNLSLGGGFNQATNDAVTR.A |

| Quer<br>y                        | Star<br>t | En<br>d  | Observe<br>d  | Mr(expt<br>)  | Mr(calc<br>)  | ppm  | M <sup>Score</sup><br>e | Expect      | Rank                                                    | U | Peptide                    |
|----------------------------------|-----------|----------|---------------|---------------|---------------|------|-------------------------|-------------|---------------------------------------------------------|---|----------------------------|
| <a href="#">1904</a><br><u>7</u> | 224       | -24<br>4 | 697.359<br>1  | 2089.05<br>56 | 2089.05<br>52 | 0.16 | 0122                    | 6.2e-<br>13 | 1Score<br>> 13<br>indicat<br>es<br><b>identit<br/>y</b> |   | UK.AALNLSLGGGFNQATNDAVTR.A |
| <a href="#">1904</a><br><u>8</u> | 224       | -24<br>4 | 1045.53<br>51 | 2089.05<br>56 | 2089.05<br>52 | 0.20 | 0180                    | 1e-18       | 1Score<br>> 13<br>indicat<br>es<br><b>identit<br/>y</b> |   | UK.AALNLSLGGGFNQATNDAVTR.A |
| <a href="#">1904</a><br><u>9</u> | 224       | -24<br>4 | 697.359<br>2  | 2089.05<br>59 | 2089.05<br>52 | 0.31 | 0117                    | 1.8e-<br>12 | 1Score<br>> 13<br>indicat<br>es<br><b>identit<br/>y</b> |   | UK.AALNLSLGGGFNQATNDAVTR.A |
| <a href="#">1905</a><br><u>0</u> | 224       | -24<br>4 | 697.359<br>3  | 2089.05<br>62 | 2089.05<br>52 | 0.46 | 082                     | 6.1e-<br>09 | 1Score<br>> 13<br>indicat<br>es<br><b>identit<br/>y</b> |   | UK.AALNLSLGGGFNQATNDAVTR.A |
| <a href="#">1905</a><br><u>1</u> | 224       | -24<br>4 | 1045.53<br>54 | 2089.05<br>62 | 2089.05<br>52 | 0.49 | 0110                    | 1.1e-<br>11 | 1Score<br>> 13<br>indicat<br>es<br><b>identit<br/>y</b> |   | UK.AALNLSLGGGFNQATNDAVTR.A |

| Quer<br>y                        | Star<br>t | En<br>d  | Observe<br>d  | Mr(expt<br>)  | Mr(calc<br>)  | ppm  | M <sup>Scor</sup><br>e | Expect      | Rank                                                    | U | Peptide                    |
|----------------------------------|-----------|----------|---------------|---------------|---------------|------|------------------------|-------------|---------------------------------------------------------|---|----------------------------|
| <a href="#">1905</a><br><u>2</u> | 224       | -24<br>4 | 697.359<br>5  | 2089.05<br>65 | 2089.05<br>52 | 0.62 | 0109                   | 1.4e-<br>11 | 1Score<br>> 13<br>indicat<br>es<br><b>identit<br/>y</b> |   | UK.AALNLSLGGGFNQATNDAVTR.A |
| <a href="#">1905</a><br><u>3</u> | 224       | -24<br>4 | 1045.53<br>56 | 2089.05<br>66 | 2089.05<br>52 | 0.68 | 0180                   | 9.5e-<br>19 | 1Score<br>> 13<br>indicat<br>es<br><b>identit<br/>y</b> |   | UK.AALNLSLGGGFNQATNDAVTR.A |
| <a href="#">1905</a><br><u>4</u> | 224       | -24<br>4 | 697.359<br>5  | 2089.05<br>67 | 2089.05<br>52 | 0.69 | 056                    | 2.6e-<br>06 | 1Score<br>> 13<br>indicat<br>es<br><b>identit<br/>y</b> |   | UK.AALNLSLGGGFNQATNDAVTR.A |
| <a href="#">1905</a><br><u>5</u> | 224       | -24<br>4 | 1045.53<br>58 | 2089.05<br>70 | 2089.05<br>52 | 0.87 | 0180                   | 1e-18       | 1Score<br>> 13<br>indicat<br>es<br><b>identit<br/>y</b> |   | UK.AALNLSLGGGFNQATNDAVTR.A |
| <a href="#">1905</a><br><u>6</u> | 224       | -24<br>4 | 697.359<br>9  | 2089.05<br>77 | 2089.05<br>52 | 1.20 | 0108                   | 1.7e-<br>11 | 1Score<br>> 13<br>indicat<br>es<br><b>identit<br/>y</b> |   | UK.AALNLSLGGGFNQATNDAVTR.A |



| Query                 | Start | End  | Observed | Mr (expt) | Mr (calc) | ppm  | MScore | Expect  | Rank | U | Peptide                           |
|-----------------------|-------|------|----------|-----------|-----------|------|--------|---------|------|---|-----------------------------------|
| <a href="#">19057</a> | 224   | 249  | 697.359  | 2089.0578 | 2089.0552 | 1.21 | 0119   | 1.1e-12 | 13   |   | UK.AALNLSLGGGFNQATNDAVTR.A        |
|                       |       |      |          |           |           |      |        |         |      |   | 1Score > 13<br>indicates identity |
| <a href="#">19058</a> | 224   | 249  | 697.359  | 2089.0578 | 2089.0552 | 1.25 | 0107   | 2.2e-11 | 13   |   | UK.AALNLSLGGGFNQATNDAVTR.A        |
|                       |       |      |          |           |           |      |        |         |      |   | 1Score > 13<br>indicates identity |
| <a href="#">19059</a> | 224   | 2462 | 1045.53  | 2089.0578 | 2089.0552 | 1.26 | 0176   | 2.6e-18 | 13   |   | UK.AALNLSLGGGFNQATNDAVTR.A        |
|                       |       |      |          |           |           |      |        |         |      |   | 1Score > 13<br>indicates identity |
| <a href="#">19060</a> | 224   | 249  | 697.359  | 2089.0580 | 2089.0552 | 1.33 | 0121   | 7.5e-13 | 13   |   | UK.AALNLSLGGGFNQATNDAVTR.A        |
|                       |       |      |          |           |           |      |        |         |      |   | 1Score > 13<br>indicates identity |
| <a href="#">19061</a> | 224   | 2463 | 1045.53  | 2089.0580 | 2089.0552 | 1.35 | 089    | 1.2e-09 | 13   |   | UK.AALNLSLGGGFNQATNDAVTR.A        |
|                       |       |      |          |           |           |      |        |         |      |   | 1Score > 13<br>indicates identity |

| Quer<br>y                        | Star<br>t | En<br>d  | Observe<br>d  | Mr(expt<br>)  | Mr(calc<br>)  | ppm  | M <sup>Scor</sup><br>e | Expect      | Rank                                                    | U | Peptide                    |
|----------------------------------|-----------|----------|---------------|---------------|---------------|------|------------------------|-------------|---------------------------------------------------------|---|----------------------------|
| <a href="#">1906</a><br><u>2</u> | 224       | -24<br>4 | 1045.53<br>63 | 2089.05<br>80 | 2089.05<br>52 | 1.35 | 0160                   | 9.7e-<br>17 | 1Score<br>> 13<br>indicat<br>es<br><b>identit<br/>y</b> |   | UK.AALNLSLGGGFNQATNDAVTR.A |
| <a href="#">1906</a><br><u>3</u> | 224       | -24<br>4 | 1045.53<br>64 | 2089.05<br>82 | 2089.05<br>52 | 1.45 | 0111                   | 8.6e-<br>12 | 1Score<br>> 13<br>indicat<br>es<br><b>identit<br/>y</b> |   | UK.AALNLSLGGGFNQATNDAVTR.A |
| <a href="#">1906</a><br><u>4</u> | 224       | -24<br>4 | 697.360<br>1  | 2089.05<br>83 | 2089.05<br>52 | 1.48 | 0114                   | 3.7e-<br>12 | 1Score<br>> 13<br>indicat<br>es<br><b>identit<br/>y</b> |   | UK.AALNLSLGGGFNQATNDAVTR.A |
| <a href="#">1906</a><br><u>5</u> | 224       | -24<br>4 | 697.360<br>1  | 2089.05<br>85 | 2089.05<br>52 | 1.56 | 0116                   | 2.4e-<br>12 | 1Score<br>> 13<br>indicat<br>es<br><b>identit<br/>y</b> |   | UK.AALNLSLGGGFNQATNDAVTR.A |
| <a href="#">1906</a><br><u>6</u> | 224       | -24<br>4 | 697.360<br>2  | 2089.05<br>88 | 2089.05<br>52 | 1.71 | 0116                   | 2.3e-<br>12 | 1Score<br>> 13<br>indicat<br>es<br><b>identit<br/>y</b> |   | UK.AALNLSLGGGFNQATNDAVTR.A |

| Quer<br>y                        | Star<br>t | En<br>d  | Observe<br>d  | Mr(expt<br>)  | Mr(calc<br>)  | ppm  | M <sup>Scor</sup><br>e | Expect      | Rank                                                    | U | Peptide                    |
|----------------------------------|-----------|----------|---------------|---------------|---------------|------|------------------------|-------------|---------------------------------------------------------|---|----------------------------|
| <a href="#">1906</a><br><u>7</u> | 224       | -24<br>4 | 697.360<br>2  | 2089.05<br>89 | 2089.05<br>52 | 1.77 | 0111                   | 7.4e-<br>12 | 1Score<br>> 13<br>indicat<br>es<br><b>identit<br/>y</b> |   | UK.AALNLSLGGGFNQATNDAVTR.A |
| <a href="#">1906</a><br><u>8</u> | 224       | -24<br>4 | 1045.53<br>68 | 2089.05<br>90 | 2089.05<br>52 | 1.83 | 052                    | 6.7e-<br>06 | 1Score<br>> 13<br>indicat<br>es<br><b>identit<br/>y</b> |   | UK.AALNLSLGGGFNQATNDAVTR.A |
| <a href="#">1906</a><br><u>9</u> | 224       | -24<br>4 | 1045.53<br>68 | 2089.05<br>90 | 2089.05<br>52 | 1.83 | 0180                   | 1e-18       | 1Score<br>> 13<br>indicat<br>es<br><b>identit<br/>y</b> |   | UK.AALNLSLGGGFNQATNDAVTR.A |
| <a href="#">1907</a><br><u>1</u> | 224       | -24<br>4 | 697.360<br>5  | 2089.05<br>96 | 2089.05<br>52 | 2.07 | 040                    | 9.3e-<br>05 | 1Score<br>> 13<br>indicat<br>es<br><b>identit<br/>y</b> |   | UK.AALNLSLGGGFNQATNDAVTR.A |
| <a href="#">1907</a><br><u>2</u> | 224       | -24<br>4 | 1045.53<br>71 | 2089.05<br>96 | 2089.05<br>52 | 2.12 | 0161                   | 8.7e-<br>17 | 1Score<br>> 13<br>indicat<br>es<br><b>identit<br/>y</b> |   | UK.AALNLSLGGGFNQATNDAVTR.A |

| Quer<br>y                        | Star<br>t | En<br>d  | Observe<br>d  | Mr(expt<br>)  | Mr(calc<br>)  | ppm  | M <sup>Scor</sup><br>e | Expect      | Rank                                                    | U | Peptide                    |
|----------------------------------|-----------|----------|---------------|---------------|---------------|------|------------------------|-------------|---------------------------------------------------------|---|----------------------------|
| <a href="#">1907</a><br><u>3</u> | 224       | -24<br>4 | 1045.53<br>75 | 2089.06<br>04 | 2089.05<br>52 | 2.50 | 0170                   | 1.1e-<br>17 | 1Score<br>> 13<br>indicat<br>es<br><b>identit<br/>y</b> |   | UK.AALNLSLGGGFNQATNDAVTR.A |
| <a href="#">1907</a><br><u>4</u> | 224       | -24<br>4 | 1045.53<br>75 | 2089.06<br>04 | 2089.05<br>52 | 2.50 | 0176                   | 2.6e-<br>18 | 1Score<br>> 13<br>indicat<br>es<br><b>identit<br/>y</b> |   | UK.AALNLSLGGGFNQATNDAVTR.A |
| <a href="#">1907</a><br><u>5</u> | 224       | -24<br>4 | 1045.53<br>75 | 2089.06<br>04 | 2089.05<br>52 | 2.50 | 0164                   | 4.4e-<br>17 | 1Score<br>> 13<br>indicat<br>es<br><b>identit<br/>y</b> |   | UK.AALNLSLGGGFNQATNDAVTR.A |
| <a href="#">1907</a><br><u>6</u> | 224       | -24<br>4 | 697.360<br>8  | 2089.06<br>05 | 2089.05<br>52 | 2.55 | 0102                   | 6.4e-<br>11 | 1Score<br>> 13<br>indicat<br>es<br><b>identit<br/>y</b> |   | UK.AALNLSLGGGFNQATNDAVTR.A |
| <a href="#">1907</a><br><u>7</u> | 224       | -24<br>4 | 697.360<br>8  | 2089.06<br>05 | 2089.05<br>52 | 2.55 | 095                    | 3.4e-<br>10 | 1Score<br>> 13<br>indicat<br>es<br><b>identit<br/>y</b> |   | UK.AALNLSLGGGFNQATNDAVTR.A |

| Query                            | Start | End      | Observed      | Mr (expt)     | Mr (calc)     | ppm  | MScore | Expect      | Rank                                    | U | Peptide                    |
|----------------------------------|-------|----------|---------------|---------------|---------------|------|--------|-------------|-----------------------------------------|---|----------------------------|
| <a href="#">1907</a><br><u>8</u> | 224   | -24<br>4 | 1045.53<br>76 | 2089.06<br>06 | 2089.05<br>52 | 2.60 | 0104   | 3.7e-<br>11 | 1Score<br>> 13<br>indicates<br>identity |   | UK.AALNLSLGGGFNQATNDAVTR.A |
| <a href="#">1907</a><br><u>9</u> | 224   | -24<br>4 | 1045.53<br>78 | 2089.06<br>10 | 2089.05<br>52 | 2.79 | 0173   | 4.9e-<br>18 | 1Score<br>> 13<br>indicates<br>identity |   | UK.AALNLSLGGGFNQATNDAVTR.A |
| <a href="#">1908</a><br><u>0</u> | 224   | -24<br>4 | 697.361<br>0  | 2089.06<br>12 | 2089.05<br>52 | 2.86 | 072    | 6.5e-<br>08 | 1Score<br>> 13<br>indicates<br>identity |   | UK.AALNLSLGGGFNQATNDAVTR.A |
| <a href="#">1908</a><br><u>1</u> | 224   | -24<br>4 | 697.361<br>0  | 2089.06<br>13 | 2089.05<br>52 | 2.89 | 0109   | 1.2e-<br>11 | 1Score<br>> 13<br>indicates<br>identity |   | UK.AALNLSLGGGFNQATNDAVTR.A |
| <a href="#">1908</a><br><u>2</u> | 224   | -24<br>4 | 697.361<br>1  | 2089.06<br>14 | 2089.05<br>52 | 2.95 | 098    | 1.4e-<br>10 | 1Score<br>> 13<br>indicates<br>identity |   | UK.AALNLSLGGGFNQATNDAVTR.A |

| Quer<br>y                        | Star<br>t | En<br>d  | Observe<br>d  | Mr(expt<br>)  | Mr(calc<br>)  | ppm  | M <sup>Scor</sup><br>e | Expect      | Rank                                                    | U | Peptide                    |
|----------------------------------|-----------|----------|---------------|---------------|---------------|------|------------------------|-------------|---------------------------------------------------------|---|----------------------------|
| <a href="#">1908</a><br><u>3</u> | 224       | -24<br>4 | 1045.53<br>81 | 2089.06<br>16 | 2089.05<br>52 | 3.08 | 0168                   | 1.4e-<br>17 | 1Score<br>> 13<br>indicat<br>es<br><b>identit<br/>y</b> |   | UK.AALNLSLGGGFNQATNDAVTR.A |
| <a href="#">1908</a><br><u>4</u> | 224       | -24<br>4 | 1045.53<br>85 | 2089.06<br>24 | 2089.05<br>52 | 3.46 | 085                    | 3.5e-<br>09 | 1Score<br>> 13<br>indicat<br>es<br><b>identit<br/>y</b> |   | UK.AALNLSLGGGFNQATNDAVTR.A |
| <a href="#">1908</a><br><u>5</u> | 224       | -24<br>4 | 1045.53<br>85 | 2089.06<br>24 | 2089.05<br>52 | 3.46 | 0114                   | 4.4e-<br>12 | 1Score<br>> 13<br>indicat<br>es<br><b>identit<br/>y</b> |   | UK.AALNLSLGGGFNQATNDAVTR.A |
| <a href="#">1908</a><br><u>6</u> | 224       | -24<br>4 | 697.361<br>5  | 2089.06<br>26 | 2089.05<br>52 | 3.52 | 0127                   | 1.9e-<br>13 | 1Score<br>> 13<br>indicat<br>es<br><b>identit<br/>y</b> |   | UK.AALNLSLGGGFNQATNDAVTR.A |
| <a href="#">1908</a><br><u>7</u> | 224       | -24<br>4 | 1045.53<br>86 | 2089.06<br>26 | 2089.05<br>52 | 3.55 | 0159                   | 1.2e-<br>16 | 1Score<br>> 13<br>indicat<br>es<br><b>identit<br/>y</b> |   | UK.AALNLSLGGGFNQATNDAVTR.A |

| Query                | Start | End      | Observed      | Mr (expt)     | Mr (calc)     | ppm  | MScore | Expect      | Rank                                    | U | Peptide                    |
|----------------------|-------|----------|---------------|---------------|---------------|------|--------|-------------|-----------------------------------------|---|----------------------------|
| <a href="#">1908</a> | 224   | -24<br>4 | 697.361<br>7  | 2089.06<br>32 | 2089.05<br>52 | 3.80 | 095    | 3.4e-<br>10 | 1Score<br>> 13<br>indicates<br>identity |   | UK.AALNLSLGGGFNQATNDAVTR.A |
| <a href="#">1908</a> | 224   | -24<br>4 | 1045.53<br>89 | 2089.06<br>32 | 2089.05<br>52 | 3.84 | 0161   | 8.5e-<br>17 | 1Score<br>> 13<br>indicates<br>identity |   | UK.AALNLSLGGGFNQATNDAVTR.A |
| <a href="#">1909</a> | 224   | -24<br>4 | 697.361<br>8  | 2089.06<br>35 | 2089.05<br>52 | 3.95 | 0105   | 3.4e-<br>11 | 1Score<br>> 13<br>indicates<br>identity |   | UK.AALNLSLGGGFNQATNDAVTR.A |
| <a href="#">1909</a> | 224   | -24<br>4 | 697.361<br>9  | 2089.06<br>38 | 2089.05<br>52 | 4.10 | 090    | 9.3e-<br>10 | 1Score<br>> 13<br>indicates<br>identity |   | UK.AALNLSLGGGFNQATNDAVTR.A |
| <a href="#">1909</a> | 224   | -24<br>4 | 1045.53<br>97 | 2089.06<br>48 | 2089.05<br>52 | 4.61 | 0152   | 6.3e-<br>16 | 1Score<br>> 13<br>indicates<br>identity |   | UK.AALNLSLGGGFNQATNDAVTR.A |

| Quer<br>y                        | Star<br>t | En<br>d  | Observe<br>d  | Mr(expt<br>)  | Mr(calc<br>)  | ppm   | M <sup>Scor</sup><br>e | Expect      | Rank                                                    | U      | Peptide                          |
|----------------------------------|-----------|----------|---------------|---------------|---------------|-------|------------------------|-------------|---------------------------------------------------------|--------|----------------------------------|
| <a href="#">1909</a><br><u>3</u> | 224       | -24<br>4 | 1045.54<br>04 | 2089.06<br>62 | 2089.05<br>52 | 5.28  | 0170                   | 9.3e-<br>18 | 1Score<br>> 13<br>indicat<br>es<br><b>identit<br/>y</b> |        | UK.AALNLSLGGGFNQATNDAVTR.A       |
| <a href="#">1909</a><br><u>4</u> | 224       | -24<br>4 | 697.363<br>2  | 2089.06<br>76 | 2089.05<br>52 | 5.94  | 082                    | 6.3e-<br>09 | 1Score<br>> 13<br>indicat<br>es<br><b>identit<br/>y</b> |        | UK.AALNLSLGGGFNQATNDAVTR.A       |
| <a href="#">1909</a><br><u>5</u> | 224       | -24<br>4 | 1045.54<br>31 | 2089.07<br>16 | 2089.05<br>52 | 7.86  | 0142                   | 6.6e-<br>15 | 1Score<br>> 13<br>indicat<br>es<br><b>identit<br/>y</b> |        | UK.AALNLSLGGGFNQATNDAVTR.A       |
| <a href="#">1909</a><br><u>6</u> | 224       | -24<br>4 | 1045.54<br>49 | 2089.07<br>52 | 2089.05<br>52 | 9.59  | 0135                   | 3.3e-<br>14 | 1Score<br>> 13<br>indicat<br>es<br><b>identit<br/>y</b> |        | UK.AALNLSLGGGFNQATNDAVTR.A       |
| <a href="#">2371</a><br><u>1</u> | 287       | -31<br>5 | 1462.21<br>28 | 2922.41<br>10 | 2922.41<br>48 | -1.29 | 0148                   | 1.7e-<br>15 | 1Score<br>> 13<br>indicat<br>es<br><b>identit<br/>y</b> | U<br>T | K.SSFSNWGSIVDIYAPGSNIISDAPGGGVR. |



| Query                            | Star | En       | Observe       | Mr(expt)      | Mr(calc)      | ppm   | M <sup>Score</sup> | Expect      | Rank                           | U              | Peptide                          |
|----------------------------------|------|----------|---------------|---------------|---------------|-------|--------------------|-------------|--------------------------------|----------------|----------------------------------|
| <a href="#">2371</a><br><u>2</u> | 287  | -31<br>5 | 1462.21<br>34 | 2922.41<br>22 | 2922.41<br>48 | -0.88 | 0137               | 2.2e-<br>14 | indicat<br>es                  | U <sub>T</sub> | K.SSFSNWGSIVDIYAPGSNIISDAPGGGVR. |
|                                  |      |          |               |               |               |       |                    |             | 1Score<br>> 13<br>identit<br>y |                |                                  |
| <a href="#">2371</a><br><u>3</u> | 287  | -31<br>5 | 1462.21<br>51 | 2922.41<br>56 | 2922.41<br>48 | 0.29  | 0127               | 1.9e-<br>13 | indicat<br>es                  | U <sub>T</sub> | K.SSFSNWGSIVDIYAPGSNIISDAPGGGVR. |
|                                  |      |          |               |               |               |       |                    |             | 1Score<br>> 13<br>identit<br>y |                |                                  |
| <a href="#">2371</a><br><u>4</u> | 287  | -31<br>5 | 975.146<br>8  | 2922.41<br>87 | 2922.41<br>48 | 1.33  | 0128               | 1.6e-<br>13 | indicat<br>es                  | U <sub>T</sub> | K.SSFSNWGSIVDIYAPGSNIISDAPGGGVR. |
|                                  |      |          |               |               |               |       |                    |             | 1Score<br>> 13<br>identit<br>y |                |                                  |
| <a href="#">6304</a>             | 348  | -35<br>7 | 549.342<br>6  | 1096.67<br>07 | 1096.67<br>17 | -0.85 | 177                | 2.2e-<br>08 | indicat<br>es                  |                | UR.LKQIGNAVVR.N                  |
|                                  |      |          |               |               |               |       |                    |             | 1Score<br>> 13<br>identit<br>y |                |                                  |
| <a href="#">6305</a>             | 348  | -35<br>7 | 366.564<br>2  | 1096.67<br>07 | 1096.67<br>17 | -0.84 | 194                | 4e-10       | indicat<br>es                  |                | UR.LKQIGNAVVR.N                  |
|                                  |      |          |               |               |               |       |                    |             | 1Score<br>> 13<br>identit<br>y |                |                                  |

| Query                | Start | End        | Observed | Mr (expt)     | Mr (calc)     | ppm   | M <sub>e</sub> Score | Expect      | Rank                                    | U | Peptide         |
|----------------------|-------|------------|----------|---------------|---------------|-------|----------------------|-------------|-----------------------------------------|---|-----------------|
| <a href="#">6306</a> | 348   | -35<br>7 7 | 549.342  | 1096.67<br>07 | 1096.67<br>17 | -0.83 | 174                  | 3.9e-<br>08 | 1Score<br>> 13<br>indicates<br>identity |   | UR.LKQIGNAVVR.N |
| <a href="#">6307</a> | 348   | -35<br>7 2 | 366.564  | 1096.67<br>09 | 1096.67<br>17 | -0.73 | 194                  | 4e-10       | 1Score<br>> 13<br>indicates<br>identity |   | UR.LKQIGNAVVR.N |
| <a href="#">6308</a> | 348   | -35<br>7 7 | 549.342  | 1096.67<br>09 | 1096.67<br>17 | -0.67 | 177                  | 2.2e-<br>08 | 1Score<br>> 13<br>indicates<br>identity |   | UR.LKQIGNAVVR.N |
| <a href="#">6309</a> | 348   | -35<br>7 3 | 366.564  | 1096.67<br>12 | 1096.67<br>17 | -0.46 | 194                  | 3.9e-<br>10 | 1Score<br>> 13<br>indicates<br>identity |   | UR.LKQIGNAVVR.N |
| <a href="#">6310</a> | 348   | -35<br>7 3 | 366.564  | 1096.67<br>12 | 1096.67<br>17 | -0.43 | 194                  | 3.9e-<br>10 | 1Score<br>> 13<br>indicates<br>identity |   | UR.LKQIGNAVVR.N |

| Query                | Start | End        | Observed | Mr(expt)      | Mr(calc)      | ppm   | M <sub>e</sub> Score | Expect      | Rank                                    | U | Peptide         |
|----------------------|-------|------------|----------|---------------|---------------|-------|----------------------|-------------|-----------------------------------------|---|-----------------|
| <a href="#">6311</a> | 348   | -35<br>7 4 | 366.564  | 1096.67<br>13 | 1096.67<br>17 | -0.37 | 194                  | 3.9e-<br>10 | 1Score<br>> 13<br>indicates<br>identity |   | UR.LKQIGNAVVR.N |
| <a href="#">6312</a> | 348   | -35<br>7 0 | 549.343  | 1096.67<br>15 | 1096.67<br>17 | -0.12 | 174                  | 3.8e-<br>08 | 1Score<br>> 13<br>indicates<br>identity |   | UR.LKQIGNAVVR.N |
| <a href="#">6313</a> | 348   | -35<br>7 1 | 549.343  | 1096.67<br>17 | 1096.67<br>17 | 0.006 | 176                  | 2.3e-<br>08 | 1Score<br>> 13<br>indicates<br>identity |   | UR.LKQIGNAVVR.N |
| <a href="#">6314</a> | 348   | -35<br>7 1 | 549.343  | 1096.67<br>17 | 1096.67<br>17 | 0.061 | 177                  | 2.2e-<br>08 | 1Score<br>> 13<br>indicates<br>identity |   | UR.LKQIGNAVVR.N |
| <a href="#">6315</a> | 348   | -35<br>7 6 | 366.564  | 1096.67<br>21 | 1096.67<br>17 | 0.37  | 194                  | 3.9e-<br>10 | 1Score<br>> 13<br>indicates<br>identity |   | UR.LKQIGNAVVR.N |

| Query                | Start | End        | Observed | Mr (expt)     | Mr (calc)     | ppm  | M <sub>e</sub> Score | Expect      | Rank                                    | U | Peptide         |
|----------------------|-------|------------|----------|---------------|---------------|------|----------------------|-------------|-----------------------------------------|---|-----------------|
| <a href="#">6316</a> | 348   | -35<br>7 3 | 549.343  | 1096.67<br>21 | 1096.67<br>17 | 0.44 | 175                  | 2.8e-<br>08 | 1Score<br>> 13<br>indicates<br>identity |   | UR.LKQIGNAVVR.N |
| <a href="#">6317</a> | 348   | -35<br>7 7 | 366.564  | 1096.67<br>23 | 1096.67<br>17 | 0.61 | 194                  | 4e-10       | 1Score<br>> 13<br>indicates<br>identity |   | UR.LKQIGNAVVR.N |
| <a href="#">6318</a> | 348   | -35<br>7 6 | 549.343  | 1096.67<br>25 | 1096.67<br>17 | 0.81 | 174                  | 3.8e-<br>08 | 1Score<br>> 13<br>indicates<br>identity |   | UR.LKQIGNAVVR.N |
| <a href="#">6319</a> | 348   | -35<br>7 7 | 549.343  | 1096.67<br>29 | 1096.67<br>17 | 1.12 | 174                  | 4.2e-<br>08 | 1Score<br>> 13<br>indicates<br>identity |   | UR.LKQIGNAVVR.N |
| <a href="#">6320</a> | 348   | -35<br>7 9 | 549.343  | 1096.67<br>33 | 1096.67<br>17 | 1.47 | 166                  | 2.8e-<br>07 | 1Score<br>> 13<br>indicates<br>identity |   | UR.LKQIGNAVVR.N |

| Query                | Start | End        | Observed | Mr (expt)     | Mr (calc)     | ppm   | M <sub>e</sub> Score | Expect      | Rank                                    | U | Peptide         |
|----------------------|-------|------------|----------|---------------|---------------|-------|----------------------|-------------|-----------------------------------------|---|-----------------|
| <a href="#">6322</a> | 348   | -35<br>7 9 | 549.343  | 1096.67<br>33 | 1096.67<br>17 | 1.54  | 174                  | 4.3e-<br>08 | 1Score<br>> 13<br>indicates<br>identity |   | UR.LKQIGNAVVR.N |
| <a href="#">6323</a> | 348   | -35<br>7 0 | 549.344  | 1096.67<br>35 | 1096.67<br>17 | 1.65  | 168                  | 1.5e-<br>07 | 1Score<br>> 13<br>indicates<br>identity |   | UR.LKQIGNAVVR.N |
| <a href="#">6324</a> | 348   | -35<br>7 3 | 549.344  | 1096.67<br>41 | 1096.67<br>17 | 2.19  | 155                  | 3.4e-<br>06 | 1Score<br>> 13<br>indicates<br>identity |   | UR.LKQIGNAVVR.N |
| <a href="#">6325</a> | 348   | -35<br>7 8 | 549.344  | 1096.67<br>50 | 1096.67<br>17 | 3.09  | 149                  | 1.1e-<br>05 | 1Score<br>> 13<br>indicates<br>identity |   | UR.LKQIGNAVVR.N |
| <a href="#">2210</a> | 350   | -35<br>7 1 | 428.752  | 855.489<br>7  | 855.492<br>6  | -3.46 | 056                  | 2.5e-<br>06 | 1Score<br>> 13<br>indicates<br>identity |   | UK.QIGNAVVR.N   |

| Query                | Start | End        | Observed | Mr(expt)     | Mr(calc)     | ppm   | M <sub>e</sub> Score | Expect      | Rank                                    | U             | Peptide |
|----------------------|-------|------------|----------|--------------|--------------|-------|----------------------|-------------|-----------------------------------------|---------------|---------|
| <a href="#">2213</a> | 350   | -35<br>7 5 | 428.752  | 855.490<br>4 | 855.492<br>6 | -2.66 | 056                  | 2.5e-<br>06 | 1Score<br>> 13<br>indicates<br>identity | UK.QIGNAVVR.N |         |
| <a href="#">2214</a> | 350   | -35<br>7 5 | 428.752  | 855.490<br>4 | 855.492<br>6 | -2.59 | 056                  | 2.5e-<br>06 | 1Score<br>> 13<br>indicates<br>identity | UK.QIGNAVVR.N |         |
| <a href="#">2215</a> | 350   | -35<br>7 5 | 428.752  | 855.490<br>5 | 855.492<br>6 | -2.45 | 056                  | 2.5e-<br>06 | 1Score<br>> 13<br>indicates<br>identity | UK.QIGNAVVR.N |         |
| <a href="#">2217</a> | 350   | -35<br>7 7 | 428.752  | 855.490<br>8 | 855.492<br>6 | -2.10 | 051                  | 8.6e-<br>06 | 1Score<br>> 13<br>indicates<br>identity | UK.QIGNAVVR.N |         |
| <a href="#">2218</a> | 350   | -35<br>7 9 | 428.752  | 855.491<br>1 | 855.492<br>6 | -1.75 | 056                  | 2.6e-<br>06 | 1Score<br>> 13<br>indicates<br>identity | UK.QIGNAVVR.N |         |



| Query                 | Start | End        | Observed | Mr (expt)     | Mr (calc)     | ppm   | M <sub>e</sub> Score | Expect      | Rank                                  | U                      | Peptide        |
|-----------------------|-------|------------|----------|---------------|---------------|-------|----------------------|-------------|---------------------------------------|------------------------|----------------|
| <a href="#">2226</a>  | 350   | -35<br>7 4 | 428.753  | 855.492<br>1  | 855.492<br>6  | -0.58 | 058                  | 1.7e-<br>06 | indicat<br>es<br><b>identit<br/>y</b> | UK.QIGNAVVR.N          | 1Score<br>> 13 |
| <a href="#">2227</a>  | 350   | -35<br>7 4 | 428.753  | 855.492<br>3  | 855.492<br>6  | -0.37 | 053                  | 4.9e-<br>06 | indicat<br>es<br><b>identit<br/>y</b> | UK.QIGNAVVR.N          | 1Score<br>> 13 |
| <a href="#">2228</a>  | 350   | -35<br>7 5 | 428.753  | 855.492<br>4  | 855.492<br>6  | -0.23 | 058                  | 1.5e-<br>06 | indicat<br>es<br><b>identit<br/>y</b> | UK.QIGNAVVR.N          | 1Score<br>> 13 |
| <a href="#">16290</a> | 350   | -36<br>6 7 | 595.651  | 1783.93<br>32 | 1783.92<br>89 | 2.41  | 165                  | 3.2e-<br>07 | indicat<br>es<br><b>identit<br/>y</b> | UK.QIGNAVVRNPGTSTTNR.L | 1Score<br>> 13 |



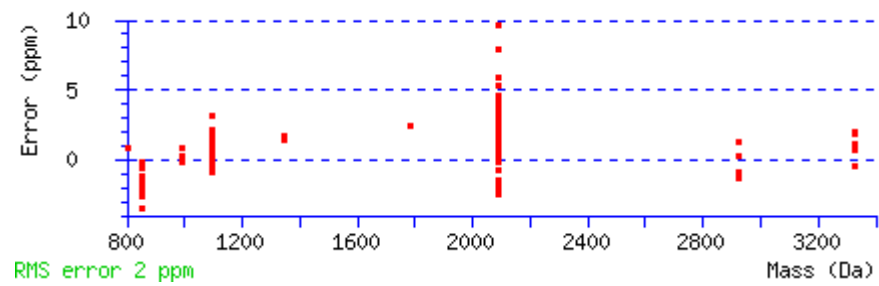

**Mascot:** <http://www.matrixscience.com/>
