# Supplementary material for: An alternative for proteinase K-heat-sensitive protease from fungus Onygena corvina for biotechnology: cloning, engineering, expression, characterization and special application for protein sequencing
Source: PubMed Central journal article supplement (PMC7313183; doi:10.1186/s12934-020-01392-3), 2020-06-24
Supplement: 12934_2020_1392_MOESM14_ESM.pdf [file 12934_2020_1392_MOESM14_ESM.pdf]

4700 Reflector Spec #1 MC[BP = 1568.8, 3009]

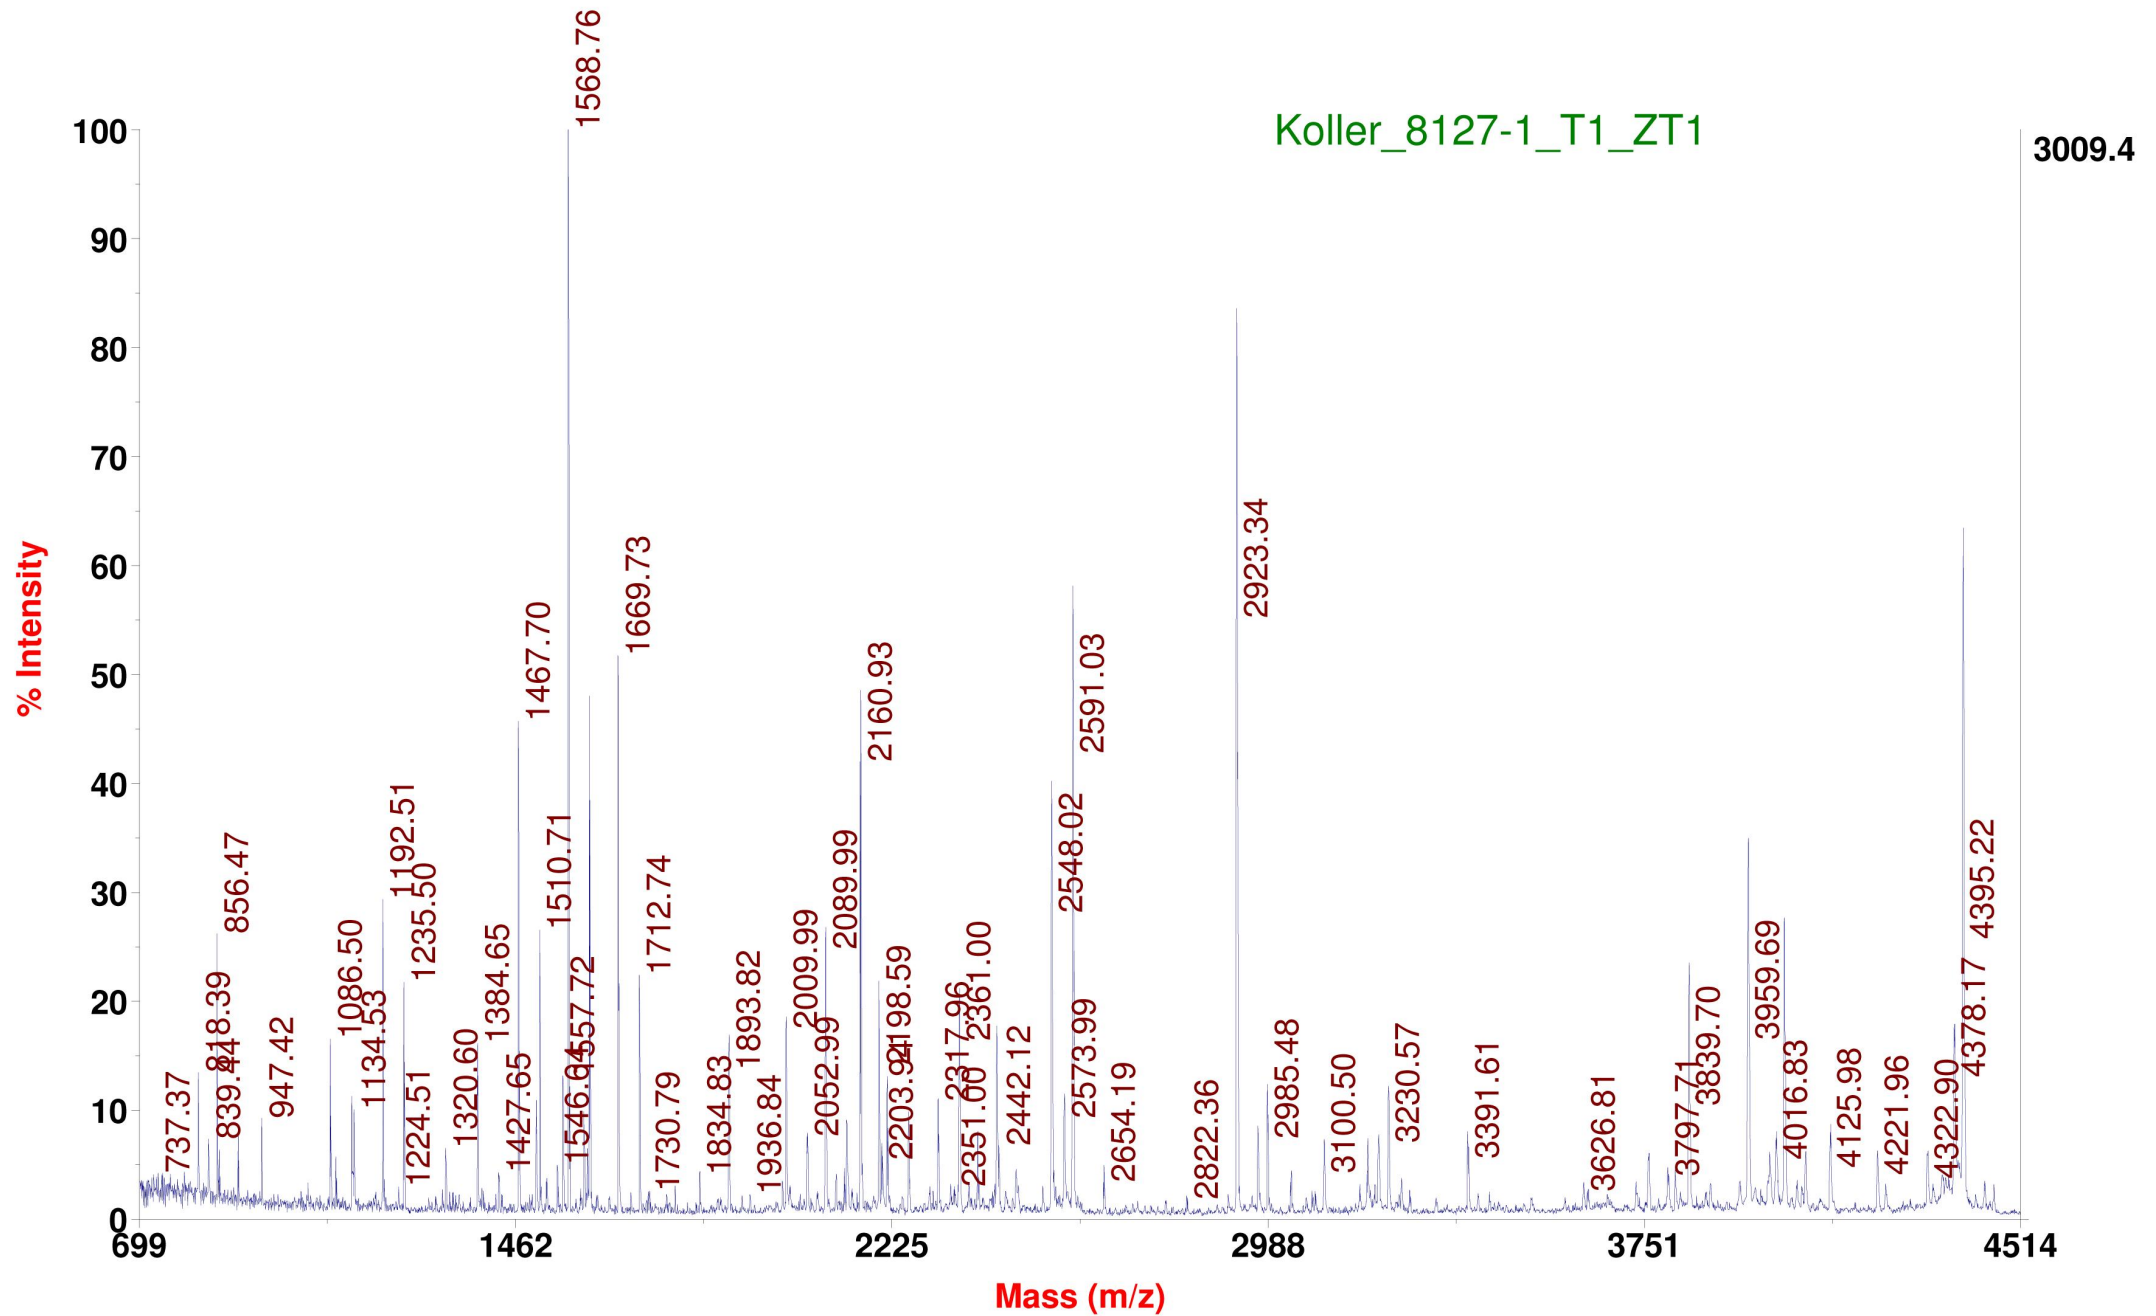



# Mascot Search Results

red arrow - N - terminal peptide

blue arrow - C - terminal peptide

User :  
 Email :  
 Search title : P9\_MS\_1.t2d - Koller\_8127-1\_T1\_ZT1  
 Database : Steffi 1 (14 sequences; 4130 residues)  
 Timestamp : 1 Dec 2016 at 07:48:00 GMT  
 Top Score : 79 for **Protease\_1\_94-372**,

## Probability Based Mowse Score

Ions score is  $-10 \cdot \log(P)$ , where P is the probability that the observed match is a random event.  
 Protein scores greater than 24 are significant ( $p < 0.05$ ).

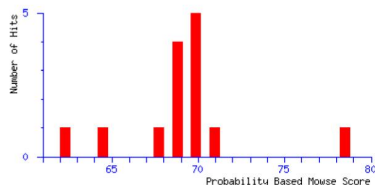

## Protein Summary Report

Format As  [Help](#)  
 Significance threshold  $p <$  Max. number of hits

## Index

| Accession                                                      | Mass  | Score | Description |
|----------------------------------------------------------------|-------|-------|-------------|
| 1. <a href="#">Protease 1 94-372</a>                           | 28361 | 79    |             |
| 2. <a href="#">Protease 1 94-366</a>                           | 27714 | 70    |             |
| 3. <a href="#">Protease 1 94-367</a>                           | 27827 | 70    |             |
| 4. <a href="#">Protease 1 94-368</a>                           | 27940 | 70    |             |
| 5. <a href="#">Protease 1 94-369</a>                           | 28103 | 70    |             |
| 6. <a href="#">Protease 1 94-370</a>                           | 28217 | 70    |             |
| 7. <a href="#">Protease 1 94-371</a>                           | 28274 | 70    |             |
| 8. <a href="#">Protease 1 94-373</a>                           | 28418 | 69    |             |
| 9. <a href="#">Protease 1 94-374</a>                           | 28546 | 69    |             |
| 10. <a href="#">Protease 1 94-375</a>                          | 28603 | 69    |             |
| 11. <a href="#">Protease 1 94-376</a>                          | 28690 | 69    |             |
| 12. <a href="#">Protease 1 94-382</a>                          | 29512 | 68    |             |
| 13. <a href="#">Protease 1 full length 1-382</a>               | 39937 | 64    |             |
| 14. <a href="#">Protease 1 full length plus Signal peptide</a> | 41853 | 62    |             |

## Results List

|    |                                                                                                                                                                                                                                                                                                                                                                                                                                                                                                                                                                                                                                                                                                                                                                                                                                                                                                                                                                                                                                                                                                                                                                                                                                                                                                       |             |                  |                  |                     |       |      |                                                                                                           |
|----|-------------------------------------------------------------------------------------------------------------------------------------------------------------------------------------------------------------------------------------------------------------------------------------------------------------------------------------------------------------------------------------------------------------------------------------------------------------------------------------------------------------------------------------------------------------------------------------------------------------------------------------------------------------------------------------------------------------------------------------------------------------------------------------------------------------------------------------------------------------------------------------------------------------------------------------------------------------------------------------------------------------------------------------------------------------------------------------------------------------------------------------------------------------------------------------------------------------------------------------------------------------------------------------------------------|-------------|------------------|------------------|---------------------|-------|------|-----------------------------------------------------------------------------------------------------------|
| 1. | <a href="#">Protease 1 94-372</a>                                                                                                                                                                                                                                                                                                                                                                                                                                                                                                                                                                                                                                                                                                                                                                                                                                                                                                                                                                                                                                                                                                                                                                                                                                                                     | Mass: 28361 | Score: <b>79</b> | Expect: 2e-007   | Queries matched: 12 |       |      |                                                                                                           |
|    | Observed                                                                                                                                                                                                                                                                                                                                                                                                                                                                                                                                                                                                                                                                                                                                                                                                                                                                                                                                                                                                                                                                                                                                                                                                                                                                                              | Mr (expt)   | Mr (calc)        | Delta            | Start               | End   | Miss | Peptide                                                                                                   |
|    | 856.4697                                                                                                                                                                                                                                                                                                                                                                                                                                                                                                                                                                                                                                                                                                                                                                                                                                                                                                                                                                                                                                                                                                                                                                                                                                                                                              | 855.4624    | 855.4926         | -0.0302          | 257                 | - 264 | 0    | K.QIGNAVVR.N                                                                                              |
|    | 947.4228                                                                                                                                                                                                                                                                                                                                                                                                                                                                                                                                                                                                                                                                                                                                                                                                                                                                                                                                                                                                                                                                                                                                                                                                                                                                                              | 946.4155    | 946.4468         | -0.0313          | 265                 | - 273 | 0    | R.NPGTSTTNR.L                                                                                             |
|    | 1097.6431                                                                                                                                                                                                                                                                                                                                                                                                                                                                                                                                                                                                                                                                                                                                                                                                                                                                                                                                                                                                                                                                                                                                                                                                                                                                                             | 1096.6358   | 1096.6716        | -0.0358          | 255                 | - 264 | 1    | R.LKQIGNAVVR.N                                                                                            |
|    | 1192.5066                                                                                                                                                                                                                                                                                                                                                                                                                                                                                                                                                                                                                                                                                                                                                                                                                                                                                                                                                                                                                                                                                                                                                                                                                                                                                             | 1191.4993   | 1191.5342        | -0.0349          | 114                 | - 123 | 0    | K.GIDWCVTDAR.S                                                                                            |
|    | 1346.6834                                                                                                                                                                                                                                                                                                                                                                                                                                                                                                                                                                                                                                                                                                                                                                                                                                                                                                                                                                                                                                                                                                                                                                                                                                                                                             | 1345.6761   | 1345.7201        | -0.0440          | 99                  | - 113 | 0    | K.VLSASGSGSNAGVIK.G                                                                                       |
|    | 1568.7599                                                                                                                                                                                                                                                                                                                                                                                                                                                                                                                                                                                                                                                                                                                                                                                                                                                                                                                                                                                                                                                                                                                                                                                                                                                                                             | 1567.7526   | 1567.8107        | -0.0580          | 1                   | - 15  | 0    | -.ALTTQPNAPSWGLGR.I  |
|    | 1594.6986                                                                                                                                                                                                                                                                                                                                                                                                                                                                                                                                                                                                                                                                                                                                                                                                                                                                                                                                                                                                                                                                                                                                                                                                                                                                                             | 1593.6913   | 1593.7747        | -0.0833          | 265                 | - 279 | 1    | R.NPGTSTTNRLLYNGS.-                                                                                       |
|    | 1784.8785                                                                                                                                                                                                                                                                                                                                                                                                                                                                                                                                                                                                                                                                                                                                                                                                                                                                                                                                                                                                                                                                                                                                                                                                                                                                                             | 1783.8713   | 1783.9288        | -0.0576          | 257                 | - 273 | 1    | K.QIGNAVVRNPGTSTTNR.L                                                                                     |
|    | 2089.9856                                                                                                                                                                                                                                                                                                                                                                                                                                                                                                                                                                                                                                                                                                                                                                                                                                                                                                                                                                                                                                                                                                                                                                                                                                                                                             | 2088.9783   | 2089.0551        | -0.0768          | 131                 | - 151 | 0    | K.AALNLSLGGFNPQATNDVTR.A                                                                                  |
|    | 2923.3357                                                                                                                                                                                                                                                                                                                                                                                                                                                                                                                                                                                                                                                                                                                                                                                                                                                                                                                                                                                                                                                                                                                                                                                                                                                                                             | 2922.3284   | 2922.4147        | -0.0863          | 194                 | - 222 | 0    | K.SSFSNWGSIVDIYAPGSNIISDAPGGVVR.T                                                                         |
|    | 3203.3560                                                                                                                                                                                                                                                                                                                                                                                                                                                                                                                                                                                                                                                                                                                                                                                                                                                                                                                                                                                                                                                                                                                                                                                                                                                                                             | 3202.3487   | 3202.4449        | -0.0962          | 223                 | - 254 | 0    | R.TMSGTSMASPHVCAGAAMLAQGVVPGQVCDR.L                                                                       |
|    | 3811.7322                                                                                                                                                                                                                                                                                                                                                                                                                                                                                                                                                                                                                                                                                                                                                                                                                                                                                                                                                                                                                                                                                                                                                                                                                                                                                             | 3810.7249   | 3810.7760        | -0.0511          | 20                  | - 55  | 1    | R.SPGNKDFVYDDTAGQGITIYGVDTGIDINHPDFGGR.A                                                                  |
|    | <b>No match to:</b> 724.4434, 733.4623, 737.3729, 744.4733, 746.4565, 749.4891, 755.4316, 760.4791, 762.5109, 768.4706, 786.5005, 790.5098, 798.4902, 818.3948, 839.4433, 858.4949, 859.4981, 861.3915, 899.4702, 1086.5004, 1129.5076, 1132.5085, 1133.4841, 1134.5315, 1224.5101, 1235.5029, 1313.6464, 1320.5973, 1334.6139, 1384.6472, 1393.6626, 1427.6527, 1433.7258, 1467.7009, 1503.6478, 1510.7076, 1524.6400, 1546.6444, 1557.7217, 1600.7336, 1605.7229, 1607.7161, 1611.7679, 1669.7307, 1712.7358, 1730.7920, 1767.8136, 1834.8348, 1893.8197, 1936.8419, 2002.8632, 2009.9857, 2052.9927, 2110.9190, 2127.9177, 2132.9998, 2142.9309, 2160.9346, 2198.0662, 2198.5911, 2203.9448, 2215.0576, 2258.0129, 2317.9634, 2351.0039, 2359.0432, 2360.9961, 2380.0496, 2398.1003, 2433.0029, 2436.9856, 2441.0759, 2442.1169, 2476.0034, 2547.0313, 2548.0212, 2553.1460, 2573.9905, 2591.0327, 2654.1919, 2822.3552, 2922.3638, 2966.3379, 2985.4771, 3033.4314, 3076.4116, 3083.3225, 3100.4958, 3173.6069, 3188.4954, 3210.4119, 3230.5667, 3253.4275, 3257.3911, 3274.5586, 3391.6094, 3626.8101, 3634.5938, 3733.6704, 3757.6819, 3797.7144, 3839.6951, 3959.6892, 4000.7944, 4005.7834, 4016.8291, 4032.7107, 4075.7166, 4125.9771, 4221.9639, 4322.8979, 4377.2358, 4378.1675, 4395.2231 |             |                  |                  |                     |       |      |                                                                                                           |
| 2. | <a href="#">Protease 1 94-366</a>                                                                                                                                                                                                                                                                                                                                                                                                                                                                                                                                                                                                                                                                                                                                                                                                                                                                                                                                                                                                                                                                                                                                                                                                                                                                     | Mass: 27714 | Score: <b>70</b> | Expect: 1.3e-006 | Queries matched: 11 |       |      |                                                                                                           |
|    | Observed                                                                                                                                                                                                                                                                                                                                                                                                                                                                                                                                                                                                                                                                                                                                                                                                                                                                                                                                                                                                                                                                                                                                                                                                                                                                                              | Mr (expt)   | Mr (calc)        | Delta            | Start               | End   | Miss | Peptide                                                                                                   |
|    | 856.4697                                                                                                                                                                                                                                                                                                                                                                                                                                                                                                                                                                                                                                                                                                                                                                                                                                                                                                                                                                                                                                                                                                                                                                                                                                                                                              | 855.4624    | 855.4926         | -0.0302          | 257                 | - 264 | 0    | K.QIGNAVVR.N                                                                                              |
|    | 947.4228                                                                                                                                                                                                                                                                                                                                                                                                                                                                                                                                                                                                                                                                                                                                                                                                                                                                                                                                                                                                                                                                                                                                                                                                                                                                                              | 946.4155    | 946.4468         | -0.0313          | 265                 | - 273 | 0    | R.NPGTSTTNR.-                                                                                             |
|    | 1097.6431                                                                                                                                                                                                                                                                                                                                                                                                                                                                                                                                                                                                                                                                                                                                                                                                                                                                                                                                                                                                                                                                                                                                                                                                                                                                                             | 1096.6358   | 1096.6716        | -0.0358          | 255                 | - 264 | 1    | R.LKQIGNAVVR.N                                                                                            |
|    | 1192.5066                                                                                                                                                                                                                                                                                                                                                                                                                                                                                                                                                                                                                                                                                                                                                                                                                                                                                                                                                                                                                                                                                                                                                                                                                                                                                             | 1191.4993   | 1191.5342        | -0.0349          | 114                 | - 123 | 0    | K.GIDWCVTDAR.S                                                                                            |
|    | 1346.6834                                                                                                                                                                                                                                                                                                                                                                                                                                                                                                                                                                                                                                                                                                                                                                                                                                                                                                                                                                                                                                                                                                                                                                                                                                                                                             | 1345.6761   | 1345.7201        | -0.0440          | 99                  | - 113 | 0    | K.VLSASGSGSNAGVIK.G                                                                                       |
|    | 1568.7599                                                                                                                                                                                                                                                                                                                                                                                                                                                                                                                                                                                                                                                                                                                                                                                                                                                                                                                                                                                                                                                                                                                                                                                                                                                                                             | 1567.7526   | 1567.8107        | -0.0580          | 1                   | - 15  | 0    | -.ALTTQPNAPSWGLGR.I  |
|    | 1784.8785                                                                                                                                                                                                                                                                                                                                                                                                                                                                                                                                                                                                                                                                                                                                                                                                                                                                                                                                                                                                                                                                                                                                                                                                                                                                                             | 1783.8713   | 1783.9288        | -0.0576          | 257                 | - 273 | 1    | K.QIGNAVVRNPGTSTTNR.-                                                                                     |

2089.9856 2088.9783 2089.0551 -0.0768 131 - 151 0 K.AALNLSLGGGFNQATNDVAVTR.A  
 2923.3357 2922.3284 2922.4147 -0.0863 194 - 222 0 K.SSFSNWGSIVDIYAPGSNIISDAPGGGV.R  
 3203.3560 3202.3487 3202.4449 -0.0962 223 - 254 0 R.TMSGTSMASPHVCGAGAAMLAQGVVPGVQVCDR.L  
 3811.7322 3810.7249 3810.7760 -0.0511 20 - 55 1 R.SPGNKDFVYDDTAGQGITIYGVDTGIDINHPDFGG.R  
**No match to:** 724.4434, 733.4623, 737.3729, 744.4733, 746.4565, 749.4891, 755.4316, 760.4791, 762.5109, 768.4706, 786.5005, 790.5098, 798.4902, 818.3948, 839.4433, 858.4949, 859.4981, 861.3915, 899.4702, 1086.5004, 1129.5076, 1132.5085, 1133.4841, 1134.5315, 1224.5101, 1235.5029, 1313.6464, 1320.5973, 1334.6139, 1384.6472, 1393.6626, 1427.6527, 1433.7258, 1467.7009, 1503.6478, 1510.7076, 1524.6400, 1546.6444, 1557.7217, 1594.6986, 1600.7336, 1605.7229, 1607.7161, 1611.7679, 1669.7307, 1712.7358, 1730.7920, 1767.8136, 1834.8348, 1893.8197, 1936.8419, 2002.8632, 2009.9857, 2052.9927, 2110.9190, 2127.9177, 2132.9998, 2142.9309, 2160.9346, 2198.0662, 2198.5911, 2203.9448, 2215.0576, 2258.0129, 2317.9634, 2351.0039, 2359.0432, 2360.9961, 2380.0496, 2398.1003, 2433.0029, 2436.9856, 2441.0759, 2442.1169, 2476.0034, 2547.0313, 2548.0212, 2553.1460, 2573.9905, 2591.0327, 2654.1919, 2822.3552, 2922.3638, 2966.3379, 2985.4771, 3033.4314, 3076.4116, 3083.3225, 3100.4958, 3173.6069, 3188.4954, 3210.4119, 3230.5667, 3253.4275, 3257.3911, 3274.5586, 3391.6094, 3626.8101, 3634.5938, 3733.6704, 3757.6819, 3797.7144, 3839.6951, 3959.6892, 4000.7944, 4005.7834, 4016.8291, 4032.7107, 4075.7166, 4125.9771, 4221.9639, 4322.8979, 4377.2358, 4378.1675, 4395.2231

3. [Protease 1 94-367](#) Mass: 27827 Score: 70 Expect: 1.3e-006 Queries matched: 11

| Observed  | Mr (expt) | Mr (calc) | Delta   | Start | End | Miss | Peptide                                   |
|-----------|-----------|-----------|---------|-------|-----|------|-------------------------------------------|
| 856.4697  | 855.4624  | 855.4926  | -0.0302 | 257   | -   | 264  | 0 K.QIGNAVVR.N                            |
| 947.4228  | 946.4155  | 946.4468  | -0.0313 | 265   | -   | 273  | 0 R.NPGTSTTNR.L                           |
| 1097.6431 | 1096.6358 | 1096.6716 | -0.0358 | 255   | -   | 264  | 1 R.LKQIGNAVVR.N                          |
| 1192.5066 | 1191.4993 | 1191.5342 | -0.0349 | 114   | -   | 123  | 0 K.GIDWCVTDR.S                           |
| 1346.6834 | 1345.6761 | 1345.7201 | -0.0440 | 99    | -   | 113  | 0 K.VLSASGSGSNAGVIK.G                     |
| 1568.7599 | 1567.7526 | 1567.8107 | -0.0580 | 1     | -   | 15   | 0 -.ALTTQPNAPSWGGLGR.I ←                  |
| 1784.8785 | 1783.8713 | 1783.9288 | -0.0576 | 257   | -   | 273  | 1 K.QIGNAVVRNPGTSTTNR.L                   |
| 2089.9856 | 2088.9783 | 2089.0551 | -0.0768 | 131   | -   | 151  | 0 K.AALNLSLGGGFNQATNDVAVTR.A              |
| 2923.3357 | 2922.3284 | 2922.4147 | -0.0863 | 194   | -   | 222  | 0 K.SSFSNWGSIVDIYAPGSNIISDAPGGGV.R        |
| 3203.3560 | 3202.3487 | 3202.4449 | -0.0962 | 223   | -   | 254  | 0 R.TMSGTSMASPHVCGAGAAMLAQGVVPGVQVCDR.L   |
| 3811.7322 | 3810.7249 | 3810.7760 | -0.0511 | 20    | -   | 55   | 1 R.SPGNKDFVYDDTAGQGITIYGVDTGIDINHPDFGG.R |

**No match to:** 724.4434, 733.4623, 737.3729, 744.4733, 746.4565, 749.4891, 755.4316, 760.4791, 762.5109, 768.4706, 786.5005, 790.5098, 798.4902, 818.3948, 839.4433, 858.4949, 859.4981, 861.3915, 899.4702, 1086.5004, 1129.5076, 1132.5085, 1133.4841, 1134.5315, 1224.5101, 1235.5029, 1313.6464, 1320.5973, 1334.6139, 1384.6472, 1393.6626, 1427.6527, 1433.7258, 1467.7009, 1503.6478, 1510.7076, 1524.6400, 1546.6444, 1557.7217, 1594.6986, 1600.7336, 1605.7229, 1607.7161, 1611.7679, 1669.7307, 1712.7358, 1730.7920, 1767.8136, 1834.8348, 1893.8197, 1936.8419, 2002.8632, 2009.9857, 2052.9927, 2110.9190, 2127.9177, 2132.9998, 2142.9309, 2160.9346, 2198.0662, 2198.5911, 2203.9448, 2215.0576, 2258.0129, 2317.9634, 2351.0039, 2359.0432, 2360.9961, 2380.0496, 2398.1003, 2433.0029, 2436.9856, 2441.0759, 2442.1169, 2476.0034, 2547.0313, 2548.0212, 2553.1460, 2573.9905, 2591.0327, 2654.1919, 2822.3552, 2922.3638, 2966.3379, 2985.4771, 3033.4314, 3076.4116, 3083.3225, 3100.4958, 3173.6069, 3188.4954, 3210.4119, 3230.5667, 3253.4275, 3257.3911, 3274.5586, 3391.6094, 3626.8101, 3634.5938, 3733.6704, 3757.6819, 3797.7144, 3839.6951, 3959.6892, 4000.7944, 4005.7834, 4016.8291, 4032.7107, 4075.7166, 4125.9771, 4221.9639, 4322.8979, 4377.2358, 4378.1675, 4395.2231

4. [Protease 1 94-368](#) Mass: 27940 Score: 70 Expect: 1.4e-006 Queries matched: 11

| Observed  | Mr (expt) | Mr (calc) | Delta   | Start | End | Miss | Peptide                                   |
|-----------|-----------|-----------|---------|-------|-----|------|-------------------------------------------|
| 856.4697  | 855.4624  | 855.4926  | -0.0302 | 257   | -   | 264  | 0 K.QIGNAVVR.N                            |
| 947.4228  | 946.4155  | 946.4468  | -0.0313 | 265   | -   | 273  | 0 R.NPGTSTTNR.L                           |
| 1097.6431 | 1096.6358 | 1096.6716 | -0.0358 | 255   | -   | 264  | 1 R.LKQIGNAVVR.N                          |
| 1192.5066 | 1191.4993 | 1191.5342 | -0.0349 | 114   | -   | 123  | 0 K.GIDWCVTDR.S                           |
| 1346.6834 | 1345.6761 | 1345.7201 | -0.0440 | 99    | -   | 113  | 0 K.VLSASGSGSNAGVIK.G                     |
| 1568.7599 | 1567.7526 | 1567.8107 | -0.0580 | 1     | -   | 15   | 0 -.ALTTQPNAPSWGGLGR.I ←                  |
| 1784.8785 | 1783.8713 | 1783.9288 | -0.0576 | 257   | -   | 273  | 1 K.QIGNAVVRNPGTSTTNR.L                   |
| 2089.9856 | 2088.9783 | 2089.0551 | -0.0768 | 131   | -   | 151  | 0 K.AALNLSLGGGFNQATNDVAVTR.A              |
| 2923.3357 | 2922.3284 | 2922.4147 | -0.0863 | 194   | -   | 222  | 0 K.SSFSNWGSIVDIYAPGSNIISDAPGGGV.R        |
| 3203.3560 | 3202.3487 | 3202.4449 | -0.0962 | 223   | -   | 254  | 0 R.TMSGTSMASPHVCGAGAAMLAQGVVPGVQVCDR.L   |
| 3811.7322 | 3810.7249 | 3810.7760 | -0.0511 | 20    | -   | 55   | 1 R.SPGNKDFVYDDTAGQGITIYGVDTGIDINHPDFGG.R |

**No match to:** 724.4434, 733.4623, 737.3729, 744.4733, 746.4565, 749.4891, 755.4316, 760.4791, 762.5109, 768.4706, 786.5005, 790.5098, 798.4902, 818.3948, 839.4433, 858.4949, 859.4981, 861.3915, 899.4702, 1086.5004, 1129.5076, 1132.5085, 1133.4841, 1134.5315, 1224.5101, 1235.5029, 1313.6464, 1320.5973, 1334.6139, 1384.6472, 1393.6626, 1427.6527, 1433.7258, 1467.7009, 1503.6478, 1510.7076, 1524.6400, 1546.6444, 1557.7217, 1594.6986, 1600.7336, 1605.7229, 1607.7161, 1611.7679, 1669.7307, 1712.7358, 1730.7920, 1767.8136, 1834.8348, 1893.8197, 1936.8419, 2002.8632, 2009.9857, 2052.9927, 2110.9190, 2127.9177, 2132.9998, 2142.9309, 2160.9346, 2198.0662, 2198.5911, 2203.9448, 2215.0576, 2258.0129, 2317.9634, 2351.0039, 2359.0432, 2360.9961, 2380.0496, 2398.1003, 2433.0029, 2436.9856, 2441.0759, 2442.1169, 2476.0034, 2547.0313, 2548.0212, 2553.1460, 2573.9905, 2591.0327, 2654.1919, 2822.3552, 2922.3638, 2966.3379, 2985.4771, 3033.4314, 3076.4116, 3083.3225, 3100.4958, 3173.6069, 3188.4954, 3210.4119, 3230.5667, 3253.4275, 3257.3911, 3274.5586, 3391.6094, 3626.8101, 3634.5938, 3733.6704, 3757.6819, 3797.7144, 3839.6951, 3959.6892, 4000.7944, 4005.7834, 4016.8291, 4032.7107, 4075.7166, 4125.9771, 4221.9639, 4322.8979, 4377.2358, 4378.1675, 4395.2231

5. [Protease 1 94-369](#) Mass: 28103 Score: 70 Expect: 1.4e-006 Queries matched: 11

| Observed  | Mr (expt) | Mr (calc) | Delta   | Start | End | Miss | Peptide                                   |
|-----------|-----------|-----------|---------|-------|-----|------|-------------------------------------------|
| 856.4697  | 855.4624  | 855.4926  | -0.0302 | 257   | -   | 264  | 0 K.QIGNAVVR.N                            |
| 947.4228  | 946.4155  | 946.4468  | -0.0313 | 265   | -   | 273  | 0 R.NPGTSTTNR.L                           |
| 1097.6431 | 1096.6358 | 1096.6716 | -0.0358 | 255   | -   | 264  | 1 R.LKQIGNAVVR.N                          |
| 1192.5066 | 1191.4993 | 1191.5342 | -0.0349 | 114   | -   | 123  | 0 K.GIDWCVTDR.S                           |
| 1346.6834 | 1345.6761 | 1345.7201 | -0.0440 | 99    | -   | 113  | 0 K.VLSASGSGSNAGVIK.G                     |
| 1568.7599 | 1567.7526 | 1567.8107 | -0.0580 | 1     | -   | 15   | 0 -.ALTTQPNAPSWGGLGR.I ←                  |
| 1784.8785 | 1783.8713 | 1783.9288 | -0.0576 | 257   | -   | 273  | 1 K.QIGNAVVRNPGTSTTNR.L                   |
| 2089.9856 | 2088.9783 | 2089.0551 | -0.0768 | 131   | -   | 151  | 0 K.AALNLSLGGGFNQATNDVAVTR.A              |
| 2923.3357 | 2922.3284 | 2922.4147 | -0.0863 | 194   | -   | 222  | 0 K.SSFSNWGSIVDIYAPGSNIISDAPGGGV.R        |
| 3203.3560 | 3202.3487 | 3202.4449 | -0.0962 | 223   | -   | 254  | 0 R.TMSGTSMASPHVCGAGAAMLAQGVVPGVQVCDR.L   |
| 3811.7322 | 3810.7249 | 3810.7760 | -0.0511 | 20    | -   | 55   | 1 R.SPGNKDFVYDDTAGQGITIYGVDTGIDINHPDFGG.R |

**No match to:** 724.4434, 733.4623, 737.3729, 744.4733, 746.4565, 749.4891, 755.4316, 760.4791, 762.5109, 768.4706, 786.5005, 790.5098, 798.4902, 818.3948, 839.4433, 858.4949, 859.4981, 861.3915, 899.4702, 1086.5004, 1129.5076, 1132.5085, 1133.4841, 1134.5315, 1224.5101, 1235.5029, 1313.6464, 1320.5973, 1334.6139, 1384.6472, 1393.6626, 1427.6527, 1433.7258, 1467.7009, 1503.6478, 1510.7076, 1524.6400, 1546.6444, 1557.7217, 1594.6986, 1600.7336, 1605.7229, 1607.7161, 1611.7679, 1669.7307, 1712.7358, 1730.7920, 1767.8136, 1834.8348, 1893.8197, 1936.8419, 2002.8632, 2009.9857, 2052.9927, 2110.9190, 2127.9177, 2132.9998, 2142.9309, 2160.9346, 2198.0662, 2198.5911, 2203.9448, 2215.0576, 2258.0129, 2317.9634, 2351.0039, 2359.0432, 2360.9961, 2380.0496, 2398.1003, 2433.0029, 2436.9856, 2441.0759, 2442.1169, 2476.0034, 2547.0313, 2548.0212, 2553.1460, 2573.9905, 2591.0327, 2654.1919, 2822.3552, 2922.3638, 2966.3379, 2985.4771, 3033.4314, 3076.4116, 3083.3225, 3100.4958, 3173.6069, 3188.4954, 3210.4119, 3230.5667, 3253.4275, 3257.3911, 3274.5586, 3391.6094, 3626.8101, 3634.5938, 3733.6704, 3757.6819, 3797.7144, 3839.6951, 3959.6892, 4000.7944, 4005.7834, 4016.8291, 4032.7107, 4075.7166, 4125.9771, 4221.9639, 4322.8979, 4377.2358, 4378.1675, 4395.2231

3210.4119, 3230.5667, 3253.4275, 3257.3911, 3274.5586, 3391.6094, 3626.8101, 3634.5938, 3733.6704, 3757.6819,  
3797.7144, 3839.6951, 3959.6892, 4000.7944, 4005.7834, 4016.8291, 4032.7107, 4075.7166, 4125.9771, 4221.9639,  
4322.8979, 4377.2358, 4378.1675, 4395.2231

6. [Protease 1 94-370](#) Mass: 28217 Score: 70 Expect: 1.5e-006 Queries matched: 11

| Observed                                                                                                                                                                                                                                                                                                                                                                                                                                                                                                                                                                                                                                                                                                                                                                                                                                                                                                                                                                                                                                                                                                                                                                                                                                                                                                         | Mr (expt) | Mr (calc) | Delta   | Start | End   | Miss | Peptide                                 |
|------------------------------------------------------------------------------------------------------------------------------------------------------------------------------------------------------------------------------------------------------------------------------------------------------------------------------------------------------------------------------------------------------------------------------------------------------------------------------------------------------------------------------------------------------------------------------------------------------------------------------------------------------------------------------------------------------------------------------------------------------------------------------------------------------------------------------------------------------------------------------------------------------------------------------------------------------------------------------------------------------------------------------------------------------------------------------------------------------------------------------------------------------------------------------------------------------------------------------------------------------------------------------------------------------------------|-----------|-----------|---------|-------|-------|------|-----------------------------------------|
| 856.4697                                                                                                                                                                                                                                                                                                                                                                                                                                                                                                                                                                                                                                                                                                                                                                                                                                                                                                                                                                                                                                                                                                                                                                                                                                                                                                         | 855.4624  | 855.4926  | -0.0302 | 257   | - 264 | 0    | K.QIGNAVVR.N                            |
| 947.4228                                                                                                                                                                                                                                                                                                                                                                                                                                                                                                                                                                                                                                                                                                                                                                                                                                                                                                                                                                                                                                                                                                                                                                                                                                                                                                         | 946.4155  | 946.4468  | -0.0313 | 265   | - 273 | 0    | R.NPGTSTTNR.L                           |
| 1097.6431                                                                                                                                                                                                                                                                                                                                                                                                                                                                                                                                                                                                                                                                                                                                                                                                                                                                                                                                                                                                                                                                                                                                                                                                                                                                                                        | 1096.6358 | 1096.6716 | -0.0358 | 255   | - 264 | 1    | R.LKQIGNAVVR.N                          |
| 1192.5066                                                                                                                                                                                                                                                                                                                                                                                                                                                                                                                                                                                                                                                                                                                                                                                                                                                                                                                                                                                                                                                                                                                                                                                                                                                                                                        | 1191.4993 | 1191.5342 | -0.0349 | 114   | - 123 | 0    | K.GIDWCVTDAR.S                          |
| 1346.6834                                                                                                                                                                                                                                                                                                                                                                                                                                                                                                                                                                                                                                                                                                                                                                                                                                                                                                                                                                                                                                                                                                                                                                                                                                                                                                        | 1345.6761 | 1345.7201 | -0.0440 | 99    | - 113 | 0    | K.VLSASGSGSNAGVIK.G                     |
| 1568.7599                                                                                                                                                                                                                                                                                                                                                                                                                                                                                                                                                                                                                                                                                                                                                                                                                                                                                                                                                                                                                                                                                                                                                                                                                                                                                                        | 1567.7526 | 1567.8107 | -0.0580 | 1     | - 15  | 0    | -.ALTTQPNAPSWGGLGR.I ←                  |
| 1784.8785                                                                                                                                                                                                                                                                                                                                                                                                                                                                                                                                                                                                                                                                                                                                                                                                                                                                                                                                                                                                                                                                                                                                                                                                                                                                                                        | 1783.8713 | 1783.9288 | -0.0576 | 257   | - 273 | 1    | K.QIGNAVVRNPGTSTTNR.L                   |
| 2089.9856                                                                                                                                                                                                                                                                                                                                                                                                                                                                                                                                                                                                                                                                                                                                                                                                                                                                                                                                                                                                                                                                                                                                                                                                                                                                                                        | 2088.9783 | 2089.0551 | -0.0768 | 131   | - 151 | 0    | K.AALNLSLGGGFNQATNDVTR.A                |
| 2923.3357                                                                                                                                                                                                                                                                                                                                                                                                                                                                                                                                                                                                                                                                                                                                                                                                                                                                                                                                                                                                                                                                                                                                                                                                                                                                                                        | 2922.3284 | 2922.4147 | -0.0863 | 194   | - 222 | 0    | K.SSFSNWGSIVDIYAPGSNIISDAPGGGVR.T       |
| 3203.3560                                                                                                                                                                                                                                                                                                                                                                                                                                                                                                                                                                                                                                                                                                                                                                                                                                                                                                                                                                                                                                                                                                                                                                                                                                                                                                        | 3202.3487 | 3202.4449 | -0.0962 | 223   | - 254 | 0    | R.TMSGTSMASPHVCGAGAAMLAQGVVPGVQVCDR.L   |
| 3811.7322                                                                                                                                                                                                                                                                                                                                                                                                                                                                                                                                                                                                                                                                                                                                                                                                                                                                                                                                                                                                                                                                                                                                                                                                                                                                                                        | 3810.7249 | 3810.7760 | -0.0511 | 20    | - 55  | 1    | R.SPGNKDFVYDDTAGQGITYGVDTGIDINHPDFGGR.A |
| <b>No match to:</b> 724.4434, 733.4623, 737.3729, 744.4733, 746.4565, 749.4891, 755.4316, 760.4791, 762.5109, 768.4706, 786.5005, 790.5098, 798.4902, 818.3948, 839.4433, 858.4949, 859.4981, 861.3915, 899.4702, 1086.5004, 1129.5076, 1132.5085, 1133.4841, 1134.5315, 1224.5101, 1235.5029, 1313.6464, 1320.5973, 1334.6139, 1384.6472, 1393.6626, 1427.6527, 1433.7258, 1467.7009, 1503.6478, 1510.7076, 1524.6400, 1546.6444, 1557.7217, 1594.6986, 1600.7336, 1605.7229, 1607.7161, 1611.7679, 1669.7307, 1712.7358, 1730.7920, 1767.8136, 1834.8348, 1893.8197, 1936.8419, 2002.8632, 2009.9857, 2052.9927, 2110.9190, 2127.9177, 2132.9998, 2142.9309, 2160.9346, 2198.0662, 2198.5911, 2203.9448, 2215.0576, 2258.0129, 2317.9634, 2351.0039, 2359.0432, 2360.9961, 2380.0496, 2398.1003, 2433.0029, 2436.9856, 2441.0759, 2442.1169, 2476.0034, 2547.0313, 2548.0212, 2553.1460, 2573.9905, 2591.0327, 2654.1919, 2822.3552, 2922.3638, 2966.3379, 2985.4771, 3033.4314, 3076.4116, 3083.3225, 3100.4958, 3173.6069, 3188.4954, 3210.4119, 3230.5667, 3253.4275, 3257.3911, 3274.5586, 3391.6094, 3626.8101, 3634.5938, 3733.6704, 3757.6819, 3797.7144, 3839.6951, 3959.6892, 4000.7944, 4005.7834, 4016.8291, 4032.7107, 4075.7166, 4125.9771, 4221.9639, 4322.8979, 4377.2358, 4378.1675, 4395.2231 |           |           |         |       |       |      |                                         |

7. [Protease 1 94-371](#) Mass: 28274 Score: 70 Expect: 1.5e-006 Queries matched: 11

| Observed                                                                                                                                                                                                                                                                                                                                                                                                                                                                                                                                                                                                                                                                                                                                                                                                                                                                                                                                                                                                                                                                                                                                                                                                                                                                                                         | Mr (expt) | Mr (calc) | Delta   | Start | End   | Miss | Peptide                                 |
|------------------------------------------------------------------------------------------------------------------------------------------------------------------------------------------------------------------------------------------------------------------------------------------------------------------------------------------------------------------------------------------------------------------------------------------------------------------------------------------------------------------------------------------------------------------------------------------------------------------------------------------------------------------------------------------------------------------------------------------------------------------------------------------------------------------------------------------------------------------------------------------------------------------------------------------------------------------------------------------------------------------------------------------------------------------------------------------------------------------------------------------------------------------------------------------------------------------------------------------------------------------------------------------------------------------|-----------|-----------|---------|-------|-------|------|-----------------------------------------|
| 856.4697                                                                                                                                                                                                                                                                                                                                                                                                                                                                                                                                                                                                                                                                                                                                                                                                                                                                                                                                                                                                                                                                                                                                                                                                                                                                                                         | 855.4624  | 855.4926  | -0.0302 | 257   | - 264 | 0    | K.QIGNAVVR.N                            |
| 947.4228                                                                                                                                                                                                                                                                                                                                                                                                                                                                                                                                                                                                                                                                                                                                                                                                                                                                                                                                                                                                                                                                                                                                                                                                                                                                                                         | 946.4155  | 946.4468  | -0.0313 | 265   | - 273 | 0    | R.NPGTSTTNR.L                           |
| 1097.6431                                                                                                                                                                                                                                                                                                                                                                                                                                                                                                                                                                                                                                                                                                                                                                                                                                                                                                                                                                                                                                                                                                                                                                                                                                                                                                        | 1096.6358 | 1096.6716 | -0.0358 | 255   | - 264 | 1    | R.LKQIGNAVVR.N                          |
| 1192.5066                                                                                                                                                                                                                                                                                                                                                                                                                                                                                                                                                                                                                                                                                                                                                                                                                                                                                                                                                                                                                                                                                                                                                                                                                                                                                                        | 1191.4993 | 1191.5342 | -0.0349 | 114   | - 123 | 0    | K.GIDWCVTDAR.S                          |
| 1346.6834                                                                                                                                                                                                                                                                                                                                                                                                                                                                                                                                                                                                                                                                                                                                                                                                                                                                                                                                                                                                                                                                                                                                                                                                                                                                                                        | 1345.6761 | 1345.7201 | -0.0440 | 99    | - 113 | 0    | K.VLSASGSGSNAGVIK.G                     |
| 1568.7599                                                                                                                                                                                                                                                                                                                                                                                                                                                                                                                                                                                                                                                                                                                                                                                                                                                                                                                                                                                                                                                                                                                                                                                                                                                                                                        | 1567.7526 | 1567.8107 | -0.0580 | 1     | - 15  | 0    | -.ALTTQPNAPSWGGLGR.I ←                  |
| 1784.8785                                                                                                                                                                                                                                                                                                                                                                                                                                                                                                                                                                                                                                                                                                                                                                                                                                                                                                                                                                                                                                                                                                                                                                                                                                                                                                        | 1783.8713 | 1783.9288 | -0.0576 | 257   | - 273 | 1    | K.QIGNAVVRNPGTSTTNR.L                   |
| 2089.9856                                                                                                                                                                                                                                                                                                                                                                                                                                                                                                                                                                                                                                                                                                                                                                                                                                                                                                                                                                                                                                                                                                                                                                                                                                                                                                        | 2088.9783 | 2089.0551 | -0.0768 | 131   | - 151 | 0    | K.AALNLSLGGGFNQATNDVTR.A                |
| 2923.3357                                                                                                                                                                                                                                                                                                                                                                                                                                                                                                                                                                                                                                                                                                                                                                                                                                                                                                                                                                                                                                                                                                                                                                                                                                                                                                        | 2922.3284 | 2922.4147 | -0.0863 | 194   | - 222 | 0    | K.SSFSNWGSIVDIYAPGSNIISDAPGGGVR.T       |
| 3203.3560                                                                                                                                                                                                                                                                                                                                                                                                                                                                                                                                                                                                                                                                                                                                                                                                                                                                                                                                                                                                                                                                                                                                                                                                                                                                                                        | 3202.3487 | 3202.4449 | -0.0962 | 223   | - 254 | 0    | R.TMSGTSMASPHVCGAGAAMLAQGVVPGVQVCDR.L   |
| 3811.7322                                                                                                                                                                                                                                                                                                                                                                                                                                                                                                                                                                                                                                                                                                                                                                                                                                                                                                                                                                                                                                                                                                                                                                                                                                                                                                        | 3810.7249 | 3810.7760 | -0.0511 | 20    | - 55  | 1    | R.SPGNKDFVYDDTAGQGITYGVDTGIDINHPDFGGR.A |
| <b>No match to:</b> 724.4434, 733.4623, 737.3729, 744.4733, 746.4565, 749.4891, 755.4316, 760.4791, 762.5109, 768.4706, 786.5005, 790.5098, 798.4902, 818.3948, 839.4433, 858.4949, 859.4981, 861.3915, 899.4702, 1086.5004, 1129.5076, 1132.5085, 1133.4841, 1134.5315, 1224.5101, 1235.5029, 1313.6464, 1320.5973, 1334.6139, 1384.6472, 1393.6626, 1427.6527, 1433.7258, 1467.7009, 1503.6478, 1510.7076, 1524.6400, 1546.6444, 1557.7217, 1594.6986, 1600.7336, 1605.7229, 1607.7161, 1611.7679, 1669.7307, 1712.7358, 1730.7920, 1767.8136, 1834.8348, 1893.8197, 1936.8419, 2002.8632, 2009.9857, 2052.9927, 2110.9190, 2127.9177, 2132.9998, 2142.9309, 2160.9346, 2198.0662, 2198.5911, 2203.9448, 2215.0576, 2258.0129, 2317.9634, 2351.0039, 2359.0432, 2360.9961, 2380.0496, 2398.1003, 2433.0029, 2436.9856, 2441.0759, 2442.1169, 2476.0034, 2547.0313, 2548.0212, 2553.1460, 2573.9905, 2591.0327, 2654.1919, 2822.3552, 2922.3638, 2966.3379, 2985.4771, 3033.4314, 3076.4116, 3083.3225, 3100.4958, 3173.6069, 3188.4954, 3210.4119, 3230.5667, 3253.4275, 3257.3911, 3274.5586, 3391.6094, 3626.8101, 3634.5938, 3733.6704, 3757.6819, 3797.7144, 3839.6951, 3959.6892, 4000.7944, 4005.7834, 4016.8291, 4032.7107, 4075.7166, 4125.9771, 4221.9639, 4322.8979, 4377.2358, 4378.1675, 4395.2231 |           |           |         |       |       |      |                                         |

8. [Protease 1 94-373](#) Mass: 28418 Score: 69 Expect: 1.6e-006 Queries matched: 11

| Observed                                                                                                                                                                                                                                                                                                                                                                                                                                                                                                                                                                                                                                                                                                                                                                                                                                                                                                                                                                                                                                                                                                                                                                                                                                                                                                         | Mr (expt) | Mr (calc) | Delta   | Start | End   | Miss | Peptide                                 |
|------------------------------------------------------------------------------------------------------------------------------------------------------------------------------------------------------------------------------------------------------------------------------------------------------------------------------------------------------------------------------------------------------------------------------------------------------------------------------------------------------------------------------------------------------------------------------------------------------------------------------------------------------------------------------------------------------------------------------------------------------------------------------------------------------------------------------------------------------------------------------------------------------------------------------------------------------------------------------------------------------------------------------------------------------------------------------------------------------------------------------------------------------------------------------------------------------------------------------------------------------------------------------------------------------------------|-----------|-----------|---------|-------|-------|------|-----------------------------------------|
| 856.4697                                                                                                                                                                                                                                                                                                                                                                                                                                                                                                                                                                                                                                                                                                                                                                                                                                                                                                                                                                                                                                                                                                                                                                                                                                                                                                         | 855.4624  | 855.4926  | -0.0302 | 257   | - 264 | 0    | K.QIGNAVVR.N                            |
| 947.4228                                                                                                                                                                                                                                                                                                                                                                                                                                                                                                                                                                                                                                                                                                                                                                                                                                                                                                                                                                                                                                                                                                                                                                                                                                                                                                         | 946.4155  | 946.4468  | -0.0313 | 265   | - 273 | 0    | R.NPGTSTTNR.L                           |
| 1097.6431                                                                                                                                                                                                                                                                                                                                                                                                                                                                                                                                                                                                                                                                                                                                                                                                                                                                                                                                                                                                                                                                                                                                                                                                                                                                                                        | 1096.6358 | 1096.6716 | -0.0358 | 255   | - 264 | 1    | R.LKQIGNAVVR.N                          |
| 1192.5066                                                                                                                                                                                                                                                                                                                                                                                                                                                                                                                                                                                                                                                                                                                                                                                                                                                                                                                                                                                                                                                                                                                                                                                                                                                                                                        | 1191.4993 | 1191.5342 | -0.0349 | 114   | - 123 | 0    | K.GIDWCVTDAR.S                          |
| 1346.6834                                                                                                                                                                                                                                                                                                                                                                                                                                                                                                                                                                                                                                                                                                                                                                                                                                                                                                                                                                                                                                                                                                                                                                                                                                                                                                        | 1345.6761 | 1345.7201 | -0.0440 | 99    | - 113 | 0    | K.VLSASGSGSNAGVIK.G                     |
| 1568.7599                                                                                                                                                                                                                                                                                                                                                                                                                                                                                                                                                                                                                                                                                                                                                                                                                                                                                                                                                                                                                                                                                                                                                                                                                                                                                                        | 1567.7526 | 1567.8107 | -0.0580 | 1     | - 15  | 0    | -.ALTTQPNAPSWGGLGR.I ←                  |
| 1784.8785                                                                                                                                                                                                                                                                                                                                                                                                                                                                                                                                                                                                                                                                                                                                                                                                                                                                                                                                                                                                                                                                                                                                                                                                                                                                                                        | 1783.8713 | 1783.9288 | -0.0576 | 257   | - 273 | 1    | K.QIGNAVVRNPGTSTTNR.L                   |
| 2089.9856                                                                                                                                                                                                                                                                                                                                                                                                                                                                                                                                                                                                                                                                                                                                                                                                                                                                                                                                                                                                                                                                                                                                                                                                                                                                                                        | 2088.9783 | 2089.0551 | -0.0768 | 131   | - 151 | 0    | K.AALNLSLGGGFNQATNDVTR.A                |
| 2923.3357                                                                                                                                                                                                                                                                                                                                                                                                                                                                                                                                                                                                                                                                                                                                                                                                                                                                                                                                                                                                                                                                                                                                                                                                                                                                                                        | 2922.3284 | 2922.4147 | -0.0863 | 194   | - 222 | 0    | K.SSFSNWGSIVDIYAPGSNIISDAPGGGVR.T       |
| 3203.3560                                                                                                                                                                                                                                                                                                                                                                                                                                                                                                                                                                                                                                                                                                                                                                                                                                                                                                                                                                                                                                                                                                                                                                                                                                                                                                        | 3202.3487 | 3202.4449 | -0.0962 | 223   | - 254 | 0    | R.TMSGTSMASPHVCGAGAAMLAQGVVPGVQVCDR.L   |
| 3811.7322                                                                                                                                                                                                                                                                                                                                                                                                                                                                                                                                                                                                                                                                                                                                                                                                                                                                                                                                                                                                                                                                                                                                                                                                                                                                                                        | 3810.7249 | 3810.7760 | -0.0511 | 20    | - 55  | 1    | R.SPGNKDFVYDDTAGQGITYGVDTGIDINHPDFGGR.A |
| <b>No match to:</b> 724.4434, 733.4623, 737.3729, 744.4733, 746.4565, 749.4891, 755.4316, 760.4791, 762.5109, 768.4706, 786.5005, 790.5098, 798.4902, 818.3948, 839.4433, 858.4949, 859.4981, 861.3915, 899.4702, 1086.5004, 1129.5076, 1132.5085, 1133.4841, 1134.5315, 1224.5101, 1235.5029, 1313.6464, 1320.5973, 1334.6139, 1384.6472, 1393.6626, 1427.6527, 1433.7258, 1467.7009, 1503.6478, 1510.7076, 1524.6400, 1546.6444, 1557.7217, 1594.6986, 1600.7336, 1605.7229, 1607.7161, 1611.7679, 1669.7307, 1712.7358, 1730.7920, 1767.8136, 1834.8348, 1893.8197, 1936.8419, 2002.8632, 2009.9857, 2052.9927, 2110.9190, 2127.9177, 2132.9998, 2142.9309, 2160.9346, 2198.0662, 2198.5911, 2203.9448, 2215.0576, 2258.0129, 2317.9634, 2351.0039, 2359.0432, 2360.9961, 2380.0496, 2398.1003, 2433.0029, 2436.9856, 2441.0759, 2442.1169, 2476.0034, 2547.0313, 2548.0212, 2553.1460, 2573.9905, 2591.0327, 2654.1919, 2822.3552, 2922.3638, 2966.3379, 2985.4771, 3033.4314, 3076.4116, 3083.3225, 3100.4958, 3173.6069, 3188.4954, 3210.4119, 3230.5667, 3253.4275, 3257.3911, 3274.5586, 3391.6094, 3626.8101, 3634.5938, 3733.6704, 3757.6819, 3797.7144, 3839.6951, 3959.6892, 4000.7944, 4005.7834, 4016.8291, 4032.7107, 4075.7166, 4125.9771, 4221.9639, 4322.8979, 4377.2358, 4378.1675, 4395.2231 |           |           |         |       |       |      |                                         |

9. [Protease 1 94-374](#) Mass: 28546 Score: 69 Expect: 1.7e-006 Queries matched: 11

| Observed  | Mr (expt) | Mr (calc) | Delta   | Start | End   | Miss | Peptide                |
|-----------|-----------|-----------|---------|-------|-------|------|------------------------|
| 856.4697  | 855.4624  | 855.4926  | -0.0302 | 257   | - 264 | 0    | K.QIGNAVVR.N           |
| 947.4228  | 946.4155  | 946.4468  | -0.0313 | 265   | - 273 | 0    | R.NPGTSTTNR.L          |
| 1097.6431 | 1096.6358 | 1096.6716 | -0.0358 | 255   | - 264 | 1    | R.LKQIGNAVVR.N         |
| 1192.5066 | 1191.4993 | 1191.5342 | -0.0349 | 114   | - 123 | 0    | K.GIDWCVTDAR.S         |
| 1346.6834 | 1345.6761 | 1345.7201 | -0.0440 | 99    | - 113 | 0    | K.VLSASGSGSNAGVIK.G    |
| 1568.7599 | 1567.7526 | 1567.8107 | -0.0580 | 1     | - 15  | 0    | -.ALTTQPNAPSWGGLGR.I ← |
| 1784.8785 | 1783.8713 | 1783.9288 | -0.0576 | 257   | - 273 | 1    | K.QIGNAVVRNPGTSTTNR.L  |

2089.9856 2088.9783 2089.0551 -0.0768 131 - 151 0 K.AALNLSLGGGFNQATNDVAVTR.A  
 2923.3357 2922.3284 2922.4147 -0.0863 194 - 222 0 K.SSFSNWGSIVDIYAPGSNIISDAPGGGVR.T  
 3203.3560 3202.3487 3202.4449 -0.0962 223 - 254 0 R.TMSGTSMASPHVCGAGAAMLAQGVVPGVQVCDR.L  
 3811.7322 3810.7249 3810.7760 -0.0511 20 - 55 1 R.SPGNKDFVYDDTAGQGITIYGVDTGIDINHPDFGGR.A  
**No match to:** 724.4434, 733.4623, 737.3729, 744.4733, 746.4565, 749.4891, 755.4316, 760.4791, 762.5109, 768.4706, 786.5005, 790.5098, 798.4902, 818.3948, 839.4433, 858.4949, 859.4981, 861.3915, 899.4702, 1086.5004, 1129.5076, 1132.5085, 1133.4841, 1134.5315, 1224.5101, 1235.5029, 1313.6464, 1320.5973, 1334.6139, 1384.6472, 1393.6626, 1427.6527, 1433.7258, 1467.7009, 1503.6478, 1510.7076, 1524.6400, 1546.6444, 1557.7217, 1594.6986, 1600.7336, 1605.7229, 1607.7161, 1611.7679, 1669.7307, 1712.7358, 1730.7920, 1767.8136, 1834.8348, 1893.8197, 1936.8419, 2002.8632, 2009.9857, 2052.9927, 2110.9190, 2127.9177, 2132.9998, 2142.9309, 2160.9346, 2198.0662, 2198.5911, 2203.9448, 2215.0576, 2258.0129, 2317.9634, 2351.0039, 2359.0432, 2360.9961, 2380.0496, 2398.1003, 2433.0029, 2436.9856, 2441.0759, 2442.1169, 2476.0034, 2547.0313, 2548.0212, 2553.1460, 2573.9905, 2591.0327, 2654.1919, 2822.3552, 2922.3638, 2966.3379, 2985.4771, 3033.4314, 3076.4116, 3083.3225, 3100.4958, 3173.6069, 3188.4954, 3210.4119, 3230.5667, 3253.4275, 3257.3911, 3274.5586, 3391.6094, 3626.8101, 3634.5938, 3733.6704, 3757.6819, 3797.7144, 3839.6951, 3959.6892, 4000.7944, 4005.7834, 4016.8291, 4032.7107, 4075.7166, 4125.9771, 4221.9639, 4322.8979, 4377.2358, 4378.1675, 4395.2231

10. [Protease 1 94-375](#) Mass: 28603 Score: 69 Expect: 1.8e-006 Queries matched: 11

| Observed                                                                                                                                                                                                                                                                                                                                                                                                                                                                                                                                                                                                                                                                                                                                                                                                                                                                                                                                                                                                                                                                                                                                                                                                                                                                                                         | Mr (expt) | Mr (calc) | Delta   | Start | End | Miss | Peptide                                    |
|------------------------------------------------------------------------------------------------------------------------------------------------------------------------------------------------------------------------------------------------------------------------------------------------------------------------------------------------------------------------------------------------------------------------------------------------------------------------------------------------------------------------------------------------------------------------------------------------------------------------------------------------------------------------------------------------------------------------------------------------------------------------------------------------------------------------------------------------------------------------------------------------------------------------------------------------------------------------------------------------------------------------------------------------------------------------------------------------------------------------------------------------------------------------------------------------------------------------------------------------------------------------------------------------------------------|-----------|-----------|---------|-------|-----|------|--------------------------------------------|
| 856.4697                                                                                                                                                                                                                                                                                                                                                                                                                                                                                                                                                                                                                                                                                                                                                                                                                                                                                                                                                                                                                                                                                                                                                                                                                                                                                                         | 855.4624  | 855.4926  | -0.0302 | 257   | -   | 264  | 0 K.QIGNAVVR.N                             |
| 947.4228                                                                                                                                                                                                                                                                                                                                                                                                                                                                                                                                                                                                                                                                                                                                                                                                                                                                                                                                                                                                                                                                                                                                                                                                                                                                                                         | 946.4155  | 946.4468  | -0.0313 | 265   | -   | 273  | 0 R.NPGTSTTNR.L                            |
| 1097.6431                                                                                                                                                                                                                                                                                                                                                                                                                                                                                                                                                                                                                                                                                                                                                                                                                                                                                                                                                                                                                                                                                                                                                                                                                                                                                                        | 1096.6358 | 1096.6716 | -0.0358 | 255   | -   | 264  | 1 R.LKQIGNAVVR.N                           |
| 1192.5066                                                                                                                                                                                                                                                                                                                                                                                                                                                                                                                                                                                                                                                                                                                                                                                                                                                                                                                                                                                                                                                                                                                                                                                                                                                                                                        | 1191.4993 | 1191.5342 | -0.0349 | 114   | -   | 123  | 0 K.GIDWCVT DAR.S                          |
| 1346.6834                                                                                                                                                                                                                                                                                                                                                                                                                                                                                                                                                                                                                                                                                                                                                                                                                                                                                                                                                                                                                                                                                                                                                                                                                                                                                                        | 1345.6761 | 1345.7201 | -0.0440 | 99    | -   | 113  | 0 K.VLSASGSGSNAGVIK.G                      |
| 1568.7599                                                                                                                                                                                                                                                                                                                                                                                                                                                                                                                                                                                                                                                                                                                                                                                                                                                                                                                                                                                                                                                                                                                                                                                                                                                                                                        | 1567.7526 | 1567.8107 | -0.0580 | 1     | -   | 15   | 0 -.ALTTQPNAPSWG LGR.I ←                   |
| 1784.8785                                                                                                                                                                                                                                                                                                                                                                                                                                                                                                                                                                                                                                                                                                                                                                                                                                                                                                                                                                                                                                                                                                                                                                                                                                                                                                        | 1783.8713 | 1783.9288 | -0.0576 | 257   | -   | 273  | 1 K.QIGNAVVRNPGTSTTNR.L                    |
| 2089.9856                                                                                                                                                                                                                                                                                                                                                                                                                                                                                                                                                                                                                                                                                                                                                                                                                                                                                                                                                                                                                                                                                                                                                                                                                                                                                                        | 2088.9783 | 2089.0551 | -0.0768 | 131   | -   | 151  | 0 K.AALNLSLGGGFNQATNDVAVTR.A               |
| 2923.3357                                                                                                                                                                                                                                                                                                                                                                                                                                                                                                                                                                                                                                                                                                                                                                                                                                                                                                                                                                                                                                                                                                                                                                                                                                                                                                        | 2922.3284 | 2922.4147 | -0.0863 | 194   | -   | 222  | 0 K.SSFSNWGSIVDIYAPGSNIISDAPGGGVR.T        |
| 3203.3560                                                                                                                                                                                                                                                                                                                                                                                                                                                                                                                                                                                                                                                                                                                                                                                                                                                                                                                                                                                                                                                                                                                                                                                                                                                                                                        | 3202.3487 | 3202.4449 | -0.0962 | 223   | -   | 254  | 0 R.TMSGTSMASPHVCGAGAAMLAQGVVPGVQVCDR.L    |
| 3811.7322                                                                                                                                                                                                                                                                                                                                                                                                                                                                                                                                                                                                                                                                                                                                                                                                                                                                                                                                                                                                                                                                                                                                                                                                                                                                                                        | 3810.7249 | 3810.7760 | -0.0511 | 20    | -   | 55   | 1 R.SPGNKDFVYDDTAGQGITIYGVDTGIDINHPDFGGR.A |
| <b>No match to:</b> 724.4434, 733.4623, 737.3729, 744.4733, 746.4565, 749.4891, 755.4316, 760.4791, 762.5109, 768.4706, 786.5005, 790.5098, 798.4902, 818.3948, 839.4433, 858.4949, 859.4981, 861.3915, 899.4702, 1086.5004, 1129.5076, 1132.5085, 1133.4841, 1134.5315, 1224.5101, 1235.5029, 1313.6464, 1320.5973, 1334.6139, 1384.6472, 1393.6626, 1427.6527, 1433.7258, 1467.7009, 1503.6478, 1510.7076, 1524.6400, 1546.6444, 1557.7217, 1594.6986, 1600.7336, 1605.7229, 1607.7161, 1611.7679, 1669.7307, 1712.7358, 1730.7920, 1767.8136, 1834.8348, 1893.8197, 1936.8419, 2002.8632, 2009.9857, 2052.9927, 2110.9190, 2127.9177, 2132.9998, 2142.9309, 2160.9346, 2198.0662, 2198.5911, 2203.9448, 2215.0576, 2258.0129, 2317.9634, 2351.0039, 2359.0432, 2360.9961, 2380.0496, 2398.1003, 2433.0029, 2436.9856, 2441.0759, 2442.1169, 2476.0034, 2547.0313, 2548.0212, 2553.1460, 2573.9905, 2591.0327, 2654.1919, 2822.3552, 2922.3638, 2966.3379, 2985.4771, 3033.4314, 3076.4116, 3083.3225, 3100.4958, 3173.6069, 3188.4954, 3210.4119, 3230.5667, 3253.4275, 3257.3911, 3274.5586, 3391.6094, 3626.8101, 3634.5938, 3733.6704, 3757.6819, 3797.7144, 3839.6951, 3959.6892, 4000.7944, 4005.7834, 4016.8291, 4032.7107, 4075.7166, 4125.9771, 4221.9639, 4322.8979, 4377.2358, 4378.1675, 4395.2231 |           |           |         |       |     |      |                                            |

11. [Protease 1 94-376](#) Mass: 28690 Score: 69 Expect: 1.8e-006 Queries matched: 11

| Observed                                                                                                                                                                                                                                                                                                                                                                                                                                                                                                                                                                                                                                                                                                                                                                                                                                                                                                                                                                                                                                                                                                                                                                                                                                                                                                         | Mr (expt) | Mr (calc) | Delta   | Start | End | Miss | Peptide                                    |
|------------------------------------------------------------------------------------------------------------------------------------------------------------------------------------------------------------------------------------------------------------------------------------------------------------------------------------------------------------------------------------------------------------------------------------------------------------------------------------------------------------------------------------------------------------------------------------------------------------------------------------------------------------------------------------------------------------------------------------------------------------------------------------------------------------------------------------------------------------------------------------------------------------------------------------------------------------------------------------------------------------------------------------------------------------------------------------------------------------------------------------------------------------------------------------------------------------------------------------------------------------------------------------------------------------------|-----------|-----------|---------|-------|-----|------|--------------------------------------------|
| 856.4697                                                                                                                                                                                                                                                                                                                                                                                                                                                                                                                                                                                                                                                                                                                                                                                                                                                                                                                                                                                                                                                                                                                                                                                                                                                                                                         | 855.4624  | 855.4926  | -0.0302 | 257   | -   | 264  | 0 K.QIGNAVVR.N                             |
| 947.4228                                                                                                                                                                                                                                                                                                                                                                                                                                                                                                                                                                                                                                                                                                                                                                                                                                                                                                                                                                                                                                                                                                                                                                                                                                                                                                         | 946.4155  | 946.4468  | -0.0313 | 265   | -   | 273  | 0 R.NPGTSTTNR.L                            |
| 1097.6431                                                                                                                                                                                                                                                                                                                                                                                                                                                                                                                                                                                                                                                                                                                                                                                                                                                                                                                                                                                                                                                                                                                                                                                                                                                                                                        | 1096.6358 | 1096.6716 | -0.0358 | 255   | -   | 264  | 1 R.LKQIGNAVVR.N                           |
| 1192.5066                                                                                                                                                                                                                                                                                                                                                                                                                                                                                                                                                                                                                                                                                                                                                                                                                                                                                                                                                                                                                                                                                                                                                                                                                                                                                                        | 1191.4993 | 1191.5342 | -0.0349 | 114   | -   | 123  | 0 K.GIDWCVT DAR.S                          |
| 1346.6834                                                                                                                                                                                                                                                                                                                                                                                                                                                                                                                                                                                                                                                                                                                                                                                                                                                                                                                                                                                                                                                                                                                                                                                                                                                                                                        | 1345.6761 | 1345.7201 | -0.0440 | 99    | -   | 113  | 0 K.VLSASGSGSNAGVIK.G                      |
| 1568.7599                                                                                                                                                                                                                                                                                                                                                                                                                                                                                                                                                                                                                                                                                                                                                                                                                                                                                                                                                                                                                                                                                                                                                                                                                                                                                                        | 1567.7526 | 1567.8107 | -0.0580 | 1     | -   | 15   | 0 -.ALTTQPNAPSWG LGR.I ←                   |
| 1784.8785                                                                                                                                                                                                                                                                                                                                                                                                                                                                                                                                                                                                                                                                                                                                                                                                                                                                                                                                                                                                                                                                                                                                                                                                                                                                                                        | 1783.8713 | 1783.9288 | -0.0576 | 257   | -   | 273  | 1 K.QIGNAVVRNPGTSTTNR.L                    |
| 2089.9856                                                                                                                                                                                                                                                                                                                                                                                                                                                                                                                                                                                                                                                                                                                                                                                                                                                                                                                                                                                                                                                                                                                                                                                                                                                                                                        | 2088.9783 | 2089.0551 | -0.0768 | 131   | -   | 151  | 0 K.AALNLSLGGGFNQATNDVAVTR.A               |
| 2923.3357                                                                                                                                                                                                                                                                                                                                                                                                                                                                                                                                                                                                                                                                                                                                                                                                                                                                                                                                                                                                                                                                                                                                                                                                                                                                                                        | 2922.3284 | 2922.4147 | -0.0863 | 194   | -   | 222  | 0 K.SSFSNWGSIVDIYAPGSNIISDAPGGGVR.T        |
| 3203.3560                                                                                                                                                                                                                                                                                                                                                                                                                                                                                                                                                                                                                                                                                                                                                                                                                                                                                                                                                                                                                                                                                                                                                                                                                                                                                                        | 3202.3487 | 3202.4449 | -0.0962 | 223   | -   | 254  | 0 R.TMSGTSMASPHVCGAGAAMLAQGVVPGVQVCDR.L    |
| 3811.7322                                                                                                                                                                                                                                                                                                                                                                                                                                                                                                                                                                                                                                                                                                                                                                                                                                                                                                                                                                                                                                                                                                                                                                                                                                                                                                        | 3810.7249 | 3810.7760 | -0.0511 | 20    | -   | 55   | 1 R.SPGNKDFVYDDTAGQGITIYGVDTGIDINHPDFGGR.A |
| <b>No match to:</b> 724.4434, 733.4623, 737.3729, 744.4733, 746.4565, 749.4891, 755.4316, 760.4791, 762.5109, 768.4706, 786.5005, 790.5098, 798.4902, 818.3948, 839.4433, 858.4949, 859.4981, 861.3915, 899.4702, 1086.5004, 1129.5076, 1132.5085, 1133.4841, 1134.5315, 1224.5101, 1235.5029, 1313.6464, 1320.5973, 1334.6139, 1384.6472, 1393.6626, 1427.6527, 1433.7258, 1467.7009, 1503.6478, 1510.7076, 1524.6400, 1546.6444, 1557.7217, 1594.6986, 1600.7336, 1605.7229, 1607.7161, 1611.7679, 1669.7307, 1712.7358, 1730.7920, 1767.8136, 1834.8348, 1893.8197, 1936.8419, 2002.8632, 2009.9857, 2052.9927, 2110.9190, 2127.9177, 2132.9998, 2142.9309, 2160.9346, 2198.0662, 2198.5911, 2203.9448, 2215.0576, 2258.0129, 2317.9634, 2351.0039, 2359.0432, 2360.9961, 2380.0496, 2398.1003, 2433.0029, 2436.9856, 2441.0759, 2442.1169, 2476.0034, 2547.0313, 2548.0212, 2553.1460, 2573.9905, 2591.0327, 2654.1919, 2822.3552, 2922.3638, 2966.3379, 2985.4771, 3033.4314, 3076.4116, 3083.3225, 3100.4958, 3173.6069, 3188.4954, 3210.4119, 3230.5667, 3253.4275, 3257.3911, 3274.5586, 3391.6094, 3626.8101, 3634.5938, 3733.6704, 3757.6819, 3797.7144, 3839.6951, 3959.6892, 4000.7944, 4005.7834, 4016.8291, 4032.7107, 4075.7166, 4125.9771, 4221.9639, 4322.8979, 4377.2358, 4378.1675, 4395.2231 |           |           |         |       |     |      |                                            |

12. [Protease 1 94-382](#) Mass: 29512 Score: 68 Expect: 2.2e-006 Queries matched: 11

| Observed                                                                                                                                                                                                                                                                                                                                                                                                                                                                                                                                                                                                                                                                                                                                                                                                                                                                                                                                                                                                                                                                                                                                                                                                                                                                                                         | Mr (expt) | Mr (calc) | Delta   | Start | End | Miss | Peptide                                    |
|------------------------------------------------------------------------------------------------------------------------------------------------------------------------------------------------------------------------------------------------------------------------------------------------------------------------------------------------------------------------------------------------------------------------------------------------------------------------------------------------------------------------------------------------------------------------------------------------------------------------------------------------------------------------------------------------------------------------------------------------------------------------------------------------------------------------------------------------------------------------------------------------------------------------------------------------------------------------------------------------------------------------------------------------------------------------------------------------------------------------------------------------------------------------------------------------------------------------------------------------------------------------------------------------------------------|-----------|-----------|---------|-------|-----|------|--------------------------------------------|
| 856.4697                                                                                                                                                                                                                                                                                                                                                                                                                                                                                                                                                                                                                                                                                                                                                                                                                                                                                                                                                                                                                                                                                                                                                                                                                                                                                                         | 855.4624  | 855.4926  | -0.0302 | 257   | -   | 264  | 0 K.QIGNAVVR.N                             |
| 947.4228                                                                                                                                                                                                                                                                                                                                                                                                                                                                                                                                                                                                                                                                                                                                                                                                                                                                                                                                                                                                                                                                                                                                                                                                                                                                                                         | 946.4155  | 946.4468  | -0.0313 | 265   | -   | 273  | 0 R.NPGTSTTNR.L                            |
| 1097.6431                                                                                                                                                                                                                                                                                                                                                                                                                                                                                                                                                                                                                                                                                                                                                                                                                                                                                                                                                                                                                                                                                                                                                                                                                                                                                                        | 1096.6358 | 1096.6716 | -0.0358 | 255   | -   | 264  | 1 R.LKQIGNAVVR.N                           |
| 1192.5066                                                                                                                                                                                                                                                                                                                                                                                                                                                                                                                                                                                                                                                                                                                                                                                                                                                                                                                                                                                                                                                                                                                                                                                                                                                                                                        | 1191.4993 | 1191.5342 | -0.0349 | 114   | -   | 123  | 0 K.GIDWCVT DAR.S                          |
| 1346.6834                                                                                                                                                                                                                                                                                                                                                                                                                                                                                                                                                                                                                                                                                                                                                                                                                                                                                                                                                                                                                                                                                                                                                                                                                                                                                                        | 1345.6761 | 1345.7201 | -0.0440 | 99    | -   | 113  | 0 K.VLSASGSGSNAGVIK.G                      |
| 1568.7599                                                                                                                                                                                                                                                                                                                                                                                                                                                                                                                                                                                                                                                                                                                                                                                                                                                                                                                                                                                                                                                                                                                                                                                                                                                                                                        | 1567.7526 | 1567.8107 | -0.0580 | 1     | -   | 15   | 0 -.ALTTQPNAPSWG LGR.I ←                   |
| 1784.8785                                                                                                                                                                                                                                                                                                                                                                                                                                                                                                                                                                                                                                                                                                                                                                                                                                                                                                                                                                                                                                                                                                                                                                                                                                                                                                        | 1783.8713 | 1783.9288 | -0.0576 | 257   | -   | 273  | 1 K.QIGNAVVRNPGTSTTNR.L                    |
| 2089.9856                                                                                                                                                                                                                                                                                                                                                                                                                                                                                                                                                                                                                                                                                                                                                                                                                                                                                                                                                                                                                                                                                                                                                                                                                                                                                                        | 2088.9783 | 2089.0551 | -0.0768 | 131   | -   | 151  | 0 K.AALNLSLGGGFNQATNDVAVTR.A               |
| 2923.3357                                                                                                                                                                                                                                                                                                                                                                                                                                                                                                                                                                                                                                                                                                                                                                                                                                                                                                                                                                                                                                                                                                                                                                                                                                                                                                        | 2922.3284 | 2922.4147 | -0.0863 | 194   | -   | 222  | 0 K.SSFSNWGSIVDIYAPGSNIISDAPGGGVR.T        |
| 3203.3560                                                                                                                                                                                                                                                                                                                                                                                                                                                                                                                                                                                                                                                                                                                                                                                                                                                                                                                                                                                                                                                                                                                                                                                                                                                                                                        | 3202.3487 | 3202.4449 | -0.0962 | 223   | -   | 254  | 0 R.TMSGTSMASPHVCGAGAAMLAQGVVPGVQVCDR.L    |
| 3811.7322                                                                                                                                                                                                                                                                                                                                                                                                                                                                                                                                                                                                                                                                                                                                                                                                                                                                                                                                                                                                                                                                                                                                                                                                                                                                                                        | 3810.7249 | 3810.7760 | -0.0511 | 20    | -   | 55   | 1 R.SPGNKDFVYDDTAGQGITIYGVDTGIDINHPDFGGR.A |
| <b>No match to:</b> 724.4434, 733.4623, 737.3729, 744.4733, 746.4565, 749.4891, 755.4316, 760.4791, 762.5109, 768.4706, 786.5005, 790.5098, 798.4902, 818.3948, 839.4433, 858.4949, 859.4981, 861.3915, 899.4702, 1086.5004, 1129.5076, 1132.5085, 1133.4841, 1134.5315, 1224.5101, 1235.5029, 1313.6464, 1320.5973, 1334.6139, 1384.6472, 1393.6626, 1427.6527, 1433.7258, 1467.7009, 1503.6478, 1510.7076, 1524.6400, 1546.6444, 1557.7217, 1594.6986, 1600.7336, 1605.7229, 1607.7161, 1611.7679, 1669.7307, 1712.7358, 1730.7920, 1767.8136, 1834.8348, 1893.8197, 1936.8419, 2002.8632, 2009.9857, 2052.9927, 2110.9190, 2127.9177, 2132.9998, 2142.9309, 2160.9346, 2198.0662, 2198.5911, 2203.9448, 2215.0576, 2258.0129, 2317.9634, 2351.0039, 2359.0432, 2360.9961, 2380.0496, 2398.1003, 2433.0029, 2436.9856, 2441.0759, 2442.1169, 2476.0034, 2547.0313, 2548.0212, 2553.1460, 2573.9905, 2591.0327, 2654.1919, 2822.3552, 2922.3638, 2966.3379, 2985.4771, 3033.4314, 3076.4116, 3083.3225, 3100.4958, 3173.6069, 3188.4954, 3210.4119, 3230.5667, 3253.4275, 3257.3911, 3274.5586, 3391.6094, 3626.8101, 3634.5938, 3733.6704, 3757.6819, 3797.7144, 3839.6951, 3959.6892, 4000.7944, 4005.7834, 4016.8291, 4032.7107, 4075.7166, 4125.9771, 4221.9639, 4322.8979, 4377.2358, 4378.1675, 4395.2231 |           |           |         |       |     |      |                                            |

2822.3552, 2922.3638, 2966.3379, 2985.4771, 3033.4314, 3076.4116, 3083.3225, 3100.4958, 3173.6069, 3188.4954,  
3210.4119, 3230.5667, 3253.4275, 3257.3911, 3274.5586, 3391.6094, 3626.8101, 3634.5938, 3733.6704, 3757.6819,  
3797.7144, 3839.6951, 3959.6892, 4000.7944, 4005.7834, 4016.8291, 4032.7107, 4075.7166, 4125.9771, 4221.9639,  
4322.8979, 4377.2358, 4378.1675, 4395.2231

13. [Protease 1 full length 1-382](#) Mass: 39937 Score: 64 Expect: 5.2e-006 Queries matched: 12

| Observed                                                                                                                                                                                                                                                                                                                                                                                                                                                                                                                                                                                                                                                                                                                                                                                                                                                                                                                                                                                                                                                                                                                                                                                                                                                                                               | Mr (exp't) | Mr (calc) | Delta   | Start | End | Miss | Peptide                                     |
|--------------------------------------------------------------------------------------------------------------------------------------------------------------------------------------------------------------------------------------------------------------------------------------------------------------------------------------------------------------------------------------------------------------------------------------------------------------------------------------------------------------------------------------------------------------------------------------------------------------------------------------------------------------------------------------------------------------------------------------------------------------------------------------------------------------------------------------------------------------------------------------------------------------------------------------------------------------------------------------------------------------------------------------------------------------------------------------------------------------------------------------------------------------------------------------------------------------------------------------------------------------------------------------------------------|------------|-----------|---------|-------|-----|------|---------------------------------------------|
| 818.3948                                                                                                                                                                                                                                                                                                                                                                                                                                                                                                                                                                                                                                                                                                                                                                                                                                                                                                                                                                                                                                                                                                                                                                                                                                                                                               | 817.3876   | 817.3718  | 0.0157  | 83    | -   | 88   | 0 K.YVEHDR.V                                |
| 856.4697                                                                                                                                                                                                                                                                                                                                                                                                                                                                                                                                                                                                                                                                                                                                                                                                                                                                                                                                                                                                                                                                                                                                                                                                                                                                                               | 855.4624   | 855.4926  | -0.0302 | 350   | -   | 357  | 0 K.QIGNAVVR.N                              |
| 947.4228                                                                                                                                                                                                                                                                                                                                                                                                                                                                                                                                                                                                                                                                                                                                                                                                                                                                                                                                                                                                                                                                                                                                                                                                                                                                                               | 946.4155   | 946.4468  | -0.0313 | 358   | -   | 366  | 0 R.NPGTSTNR.L                              |
| 1097.6431                                                                                                                                                                                                                                                                                                                                                                                                                                                                                                                                                                                                                                                                                                                                                                                                                                                                                                                                                                                                                                                                                                                                                                                                                                                                                              | 1096.6358  | 1096.6716 | -0.0358 | 348   | -   | 357  | 1 R.LKQIGNAVVR.N                            |
| 1192.5066                                                                                                                                                                                                                                                                                                                                                                                                                                                                                                                                                                                                                                                                                                                                                                                                                                                                                                                                                                                                                                                                                                                                                                                                                                                                                              | 1191.4993  | 1191.5342 | -0.0349 | 207   | -   | 216  | 0 K.GIDWCVTDA.R.S                           |
| 1346.6834                                                                                                                                                                                                                                                                                                                                                                                                                                                                                                                                                                                                                                                                                                                                                                                                                                                                                                                                                                                                                                                                                                                                                                                                                                                                                              | 1345.6761  | 1345.7201 | -0.0440 | 192   | -   | 206  | 0 K.VLSASGSGSNAGVIK.G                       |
| 1784.8785                                                                                                                                                                                                                                                                                                                                                                                                                                                                                                                                                                                                                                                                                                                                                                                                                                                                                                                                                                                                                                                                                                                                                                                                                                                                                              | 1783.8713  | 1783.9288 | -0.0576 | 350   | -   | 366  | 1 K.QIGNAVVRNPGTSTNR.L                      |
| 2089.9856                                                                                                                                                                                                                                                                                                                                                                                                                                                                                                                                                                                                                                                                                                                                                                                                                                                                                                                                                                                                                                                                                                                                                                                                                                                                                              | 2088.9783  | 2089.0551 | -0.0768 | 224   | -   | 244  | 0 K.AALNLSLGGGFNQATNDVTR.A                  |
| 2380.0496                                                                                                                                                                                                                                                                                                                                                                                                                                                                                                                                                                                                                                                                                                                                                                                                                                                                                                                                                                                                                                                                                                                                                                                                                                                                                              | 2379.0423  | 2379.2044 | -0.1622 | 2     | -   | 22   | 1 R.AFFHNKGGNDIIPNSYIVVMK.D + Oxidation (M) |
| 2923.3357                                                                                                                                                                                                                                                                                                                                                                                                                                                                                                                                                                                                                                                                                                                                                                                                                                                                                                                                                                                                                                                                                                                                                                                                                                                                                              | 2922.3284  | 2922.4147 | -0.0863 | 287   | -   | 315  | 0 K.SSFSNWGSIVDIYAPGNSIISDAPGGGVR.T         |
| 3203.3560                                                                                                                                                                                                                                                                                                                                                                                                                                                                                                                                                                                                                                                                                                                                                                                                                                                                                                                                                                                                                                                                                                                                                                                                                                                                                              | 3202.3487  | 3202.4449 | -0.0962 | 316   | -   | 347  | 0 R.TMSGTSMASPHVCGAGAAMLAQGVVPVGVQVCDR.L    |
| 3811.7322                                                                                                                                                                                                                                                                                                                                                                                                                                                                                                                                                                                                                                                                                                                                                                                                                                                                                                                                                                                                                                                                                                                                                                                                                                                                                              | 3810.7249  | 3810.7760 | -0.0511 | 113   | -   | 148  | 1 R.SPGNKDFVYDDTAGQGITYGVDTGIDINHPDFGGR.A   |
| <b>No match to:</b> 724.4434, 733.4623, 737.3729, 744.4733, 746.4565, 749.4891, 755.4316, 760.4791, 762.5109, 768.4706, 786.5005, 790.5098, 798.4902, 839.4433, 858.4949, 859.4981, 861.3915, 899.4702, 1086.5004, 1129.5076, 1132.5085, 1133.4841, 1134.5315, 1224.5101, 1235.5029, 1313.6464, 1320.5973, 1334.6139, 1384.6472, 1393.6626, 1427.6527, 1433.7258, 1467.7009, 1503.6478, 1510.7076, 1524.6400, 1546.6444, 1557.7217, 1568.7599, 1594.6986, 1600.7336, 1605.7229, 1607.7161, 1611.7679, 1669.7307, 1712.7358, 1730.7920, 1767.8136, 1834.8348, 1893.8197, 1936.8419, 2002.8632, 2009.9857, 2052.9927, 2110.9190, 2127.9177, 2132.9998, 2142.9309, 2160.9346, 2198.0662, 2198.5911, 2203.9448, 2215.0576, 2258.0129, 2317.9634, 2351.0039, 2359.0432, 2360.9961, 2398.1003, 2433.0029, 2436.9856, 2441.0759, 2442.1169, 2476.0034, 2547.0313, 2548.0212, 2553.1460, 2573.9905, 2591.0327, 2654.1919, 2822.3552, 2922.3638, 2966.3379, 2985.4771, 3033.4314, 3076.4116, 3083.3225, 3100.4958, 3173.6069, 3188.4954, 3210.4119, 3230.5667, 3253.4275, 3257.3911, 3274.5586, 3391.6094, 3626.8101, 3634.5938, 3733.6704, 3757.6819, 3797.7144, 3839.6951, 3959.6892, 4000.7944, 4005.7834, 4016.8291, 4032.7107, 4075.7166, 4125.9771, 4221.9639, 4322.8979, 4377.2358, 4378.1675, 4395.2231 |            |           |         |       |     |      |                                             |

14. [Protease 1 full length plus Signal peptide](#) Mass: 41853 Score: 62 Expect: 8.2e-006 Queries matched: 12

| Observed                                                                                                                                                                                                                                                                                                                                                                                                                                                                                                                                                                                                                                                                                                                                                                                                                                                                                                                                                                                                                                                                                                                                                                                                                                                                                               | Mr (exp't) | Mr (calc) | Delta   | Start | End | Miss | Peptide                                     |
|--------------------------------------------------------------------------------------------------------------------------------------------------------------------------------------------------------------------------------------------------------------------------------------------------------------------------------------------------------------------------------------------------------------------------------------------------------------------------------------------------------------------------------------------------------------------------------------------------------------------------------------------------------------------------------------------------------------------------------------------------------------------------------------------------------------------------------------------------------------------------------------------------------------------------------------------------------------------------------------------------------------------------------------------------------------------------------------------------------------------------------------------------------------------------------------------------------------------------------------------------------------------------------------------------------|------------|-----------|---------|-------|-----|------|---------------------------------------------|
| 818.3948                                                                                                                                                                                                                                                                                                                                                                                                                                                                                                                                                                                                                                                                                                                                                                                                                                                                                                                                                                                                                                                                                                                                                                                                                                                                                               | 817.3876   | 817.3718  | 0.0157  | 102   | -   | 107  | 0 K.YVEHDR.V                                |
| 856.4697                                                                                                                                                                                                                                                                                                                                                                                                                                                                                                                                                                                                                                                                                                                                                                                                                                                                                                                                                                                                                                                                                                                                                                                                                                                                                               | 855.4624   | 855.4926  | -0.0302 | 369   | -   | 376  | 0 K.QIGNAVVR.N                              |
| 947.4228                                                                                                                                                                                                                                                                                                                                                                                                                                                                                                                                                                                                                                                                                                                                                                                                                                                                                                                                                                                                                                                                                                                                                                                                                                                                                               | 946.4155   | 946.4468  | -0.0313 | 377   | -   | 385  | 0 R.NPGTSTNR.L                              |
| 1097.6431                                                                                                                                                                                                                                                                                                                                                                                                                                                                                                                                                                                                                                                                                                                                                                                                                                                                                                                                                                                                                                                                                                                                                                                                                                                                                              | 1096.6358  | 1096.6716 | -0.0358 | 367   | -   | 376  | 1 R.LKQIGNAVVR.N                            |
| 1192.5066                                                                                                                                                                                                                                                                                                                                                                                                                                                                                                                                                                                                                                                                                                                                                                                                                                                                                                                                                                                                                                                                                                                                                                                                                                                                                              | 1191.4993  | 1191.5342 | -0.0349 | 226   | -   | 235  | 0 K.GIDWCVTDA.R.S                           |
| 1346.6834                                                                                                                                                                                                                                                                                                                                                                                                                                                                                                                                                                                                                                                                                                                                                                                                                                                                                                                                                                                                                                                                                                                                                                                                                                                                                              | 1345.6761  | 1345.7201 | -0.0440 | 211   | -   | 225  | 0 K.VLSASGSGSNAGVIK.G                       |
| 1784.8785                                                                                                                                                                                                                                                                                                                                                                                                                                                                                                                                                                                                                                                                                                                                                                                                                                                                                                                                                                                                                                                                                                                                                                                                                                                                                              | 1783.8713  | 1783.9288 | -0.0576 | 369   | -   | 385  | 1 K.QIGNAVVRNPGTSTNR.L                      |
| 2089.9856                                                                                                                                                                                                                                                                                                                                                                                                                                                                                                                                                                                                                                                                                                                                                                                                                                                                                                                                                                                                                                                                                                                                                                                                                                                                                              | 2088.9783  | 2089.0551 | -0.0768 | 243   | -   | 263  | 0 K.AALNLSLGGGFNQATNDVTR.A                  |
| 2380.0496                                                                                                                                                                                                                                                                                                                                                                                                                                                                                                                                                                                                                                                                                                                                                                                                                                                                                                                                                                                                                                                                                                                                                                                                                                                                                              | 2379.0423  | 2379.2044 | -0.1622 | 21    | -   | 41   | 1 R.AFFHNKGGNDIIPNSYIVVMK.D + Oxidation (M) |
| 2923.3357                                                                                                                                                                                                                                                                                                                                                                                                                                                                                                                                                                                                                                                                                                                                                                                                                                                                                                                                                                                                                                                                                                                                                                                                                                                                                              | 2922.3284  | 2922.4147 | -0.0863 | 306   | -   | 334  | 0 K.SSFSNWGSIVDIYAPGNSIISDAPGGGVR.T         |
| 3203.3560                                                                                                                                                                                                                                                                                                                                                                                                                                                                                                                                                                                                                                                                                                                                                                                                                                                                                                                                                                                                                                                                                                                                                                                                                                                                                              | 3202.3487  | 3202.4449 | -0.0962 | 335   | -   | 366  | 0 R.TMSGTSMASPHVCGAGAAMLAQGVVPVGVQVCDR.L    |
| 3811.7322                                                                                                                                                                                                                                                                                                                                                                                                                                                                                                                                                                                                                                                                                                                                                                                                                                                                                                                                                                                                                                                                                                                                                                                                                                                                                              | 3810.7249  | 3810.7760 | -0.0511 | 132   | -   | 167  | 1 R.SPGNKDFVYDDTAGQGITYGVDTGIDINHPDFGGR.A   |
| <b>No match to:</b> 724.4434, 733.4623, 737.3729, 744.4733, 746.4565, 749.4891, 755.4316, 760.4791, 762.5109, 768.4706, 786.5005, 790.5098, 798.4902, 839.4433, 858.4949, 859.4981, 861.3915, 899.4702, 1086.5004, 1129.5076, 1132.5085, 1133.4841, 1134.5315, 1224.5101, 1235.5029, 1313.6464, 1320.5973, 1334.6139, 1384.6472, 1393.6626, 1427.6527, 1433.7258, 1467.7009, 1503.6478, 1510.7076, 1524.6400, 1546.6444, 1557.7217, 1568.7599, 1594.6986, 1600.7336, 1605.7229, 1607.7161, 1611.7679, 1669.7307, 1712.7358, 1730.7920, 1767.8136, 1834.8348, 1893.8197, 1936.8419, 2002.8632, 2009.9857, 2052.9927, 2110.9190, 2127.9177, 2132.9998, 2142.9309, 2160.9346, 2198.0662, 2198.5911, 2203.9448, 2215.0576, 2258.0129, 2317.9634, 2351.0039, 2359.0432, 2360.9961, 2398.1003, 2433.0029, 2436.9856, 2441.0759, 2442.1169, 2476.0034, 2547.0313, 2548.0212, 2553.1460, 2573.9905, 2591.0327, 2654.1919, 2822.3552, 2922.3638, 2966.3379, 2985.4771, 3033.4314, 3076.4116, 3083.3225, 3100.4958, 3173.6069, 3188.4954, 3210.4119, 3230.5667, 3253.4275, 3257.3911, 3274.5586, 3391.6094, 3626.8101, 3634.5938, 3733.6704, 3757.6819, 3797.7144, 3839.6951, 3959.6892, 4000.7944, 4005.7834, 4016.8291, 4032.7107, 4075.7166, 4125.9771, 4221.9639, 4322.8979, 4377.2358, 4378.1675, 4395.2231 |            |           |         |       |     |      |                                             |

## Search Parameters

Type of search : Peptide Mass Fingerprint  
 Enzyme : Trypsin  
 Fixed modifications : Carbamidomethyl (C)  
 Variable modifications : Oxidation (M)  
 Mass values : Monoisotopic  
 Protein Mass : Unrestricted  
 Peptide Mass Tolerance : ± 100 ppm  
 Peptide Charge State : 1+  
 Max Missed Cleavages : 1  
 Number of queries : 126

Mascot: <http://www.matrixscience.com/>

**Mascot Search Results**

**Protein View**

Match to: **Protease\_1\_94-372** Score: **79** Expect: **2e-007**

Nominal mass ( $M_r$ ): **28361**; Calculated pI value: **8.70**  
 NCBI BLAST search of [Protease\\_1\\_94-372](#) against nr  
 Unformatted [sequence string](#) for pasting into other applications

Fixed modifications: Carbamidomethyl (C)  
 Variable modifications: Oxidation (M)  
 Cleavage by Trypsin: cuts C-term side of KR unless next residue is P  
 Number of mass values searched: **126**  
 Number of mass values matched: **12**  
 Sequence Coverage: **65%**

Matched peptides shown in **Bold Red**

**1 ALTTQPNAPS WGLGR**ISHRS **PGNKDFVYDD TAGQGITIYG VDTGIDINHP**  
**51 DFGGR**ARWGT NTVDNANNDG HGHGTHTAGT FAGNAYGIAR KASVVAVK**VL**  
**101 SASGSGSNAG VIKGIDWCVT DARS**KGALGK **AALNLSLGGG FNQATNDAVT**  
**151 RAQ**TAGIFVA VAAAGNDNKDA RNYSPASAPA VCTVASSTID **DQKSSFSNWG**  
**201 SIVDIYAPGS NIISDAPGGG VRTMSGTSMA SPHVCAGAA MLRQGVFVQ**  
**251 VCDRLKQIGN AVVRNPGTST TNRLLYNGS**

Show predicted peptides also

Sort Peptides By  Residue Number  Increasing Mass  Decreasing Mass

| Start | End | Observed  | Mr (expt) | Mr (calc) | Delta   | Miss | Sequence                                 |
|-------|-----|-----------|-----------|-----------|---------|------|------------------------------------------|
| 1     | 15  | 1568.7599 | 1567.7526 | 1567.8107 | -0.0580 | 0    | -.ALTTQPNAPSWGLGR.I ←                    |
| 20    | 55  | 3811.7322 | 3810.7249 | 3810.7760 | -0.0511 | 1    | R.SPGNKDFVYDDTAGQGITIYGVDTGIDINHPDFGGR.A |
| 99    | 113 | 1346.6834 | 1345.6761 | 1345.7201 | -0.0440 | 0    | K.VLSASGSGSNAGVIK.G                      |
| 114   | 123 | 1192.5066 | 1191.4993 | 1191.5342 | -0.0349 | 0    | K.GIDWCVTDR.S                            |
| 131   | 151 | 2089.9856 | 2088.9783 | 2089.0551 | -0.0768 | 0    | K.AALNLSLGGGFNQATNDAVTR.A                |
| 194   | 222 | 2923.3357 | 2922.3284 | 2922.4147 | -0.0863 | 0    | K.SSFSNWGSIVDIYAPGSNIISDAPGGGVR.T        |
| 223   | 254 | 3203.3560 | 3202.3487 | 3202.4449 | -0.0962 | 0    | R.TMSGTSMASPHVCAGAAAMLRQGVFVQVCDR.L      |
| 255   | 264 | 1097.6431 | 1096.6358 | 1096.6716 | -0.0358 | 1    | R.LKQIGNAVVR.N                           |
| 257   | 264 | 856.4697  | 855.4624  | 855.4926  | -0.0302 | 0    | K.QIGNAVVR.N                             |
| 257   | 273 | 1784.8785 | 1783.8713 | 1783.9288 | -0.0576 | 1    | K.QIGNAVVRNPGTSTTNR.L                    |
| 265   | 273 | 947.4228  | 946.4155  | 946.4468  | -0.0313 | 0    | R.NPGTSTTNR.L                            |
| 265   | 279 | 1594.6986 | 1593.6913 | 1593.7747 | -0.0833 | 1    | R.NPGTSTTNRLLYNGS.- ←                    |

No match to: 724.4434, 733.4623, 737.3729, 744.4733, 746.4565, 749.4891, 755.4316, 760.4791, 762.5109, 768.4706, 786.5005, 790.5098, 798.4902, 818.

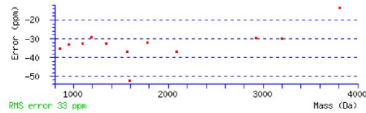

RMS error: 33 ppm

Mascot: <http://www.matrixscience.com/>

**Mascot Search Results**

**Peptide View**

MS/MS Fragmentation of **ALTTQPNAPSWGLGR**  
 Found in **Protease\_1\_94-366**

Match to Query 1: 1567.752724 from(1568.760000,1+)

Click mouse within plot area to zoom in by factor of two about that point  
 Or, Plot from  to  Da

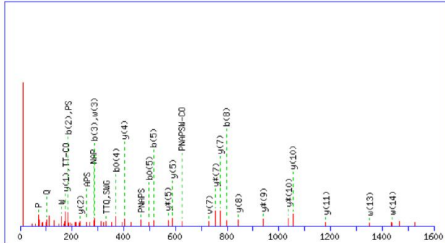

Monoisotopic mass of neutral peptide Mr(calc): 1567.8107

Fixed modifications: Carbamidomethyl (C)

Ions Score: 56 Expect: 1.5e-006

Matches (Bold Red): 35/256 fragment ions using 39 most intense peaks

| #  | Immon.          | a         | a*        | a <sup>0</sup> | b               | b*        | b <sup>0</sup>  | Seq. | v               | w                | w'        | y                | y*               | y <sup>0</sup> | #  |
|----|-----------------|-----------|-----------|----------------|-----------------|-----------|-----------------|------|-----------------|------------------|-----------|------------------|------------------|----------------|----|
| 1  | 44.0495         | 44.0495   |           |                | 72.0444         |           |                 | A    |                 |                  |           |                  |                  |                | 15 |
| 2  | 86.0964         | 157.1335  |           |                | <b>185.1284</b> |           |                 | L    | 1439.7026       | <b>1438.7073</b> |           | 1497.7808        | 1480.7543        | 1479.7703      | 14 |
| 3  | 74.0600         | 258.1812  |           | 240.1706       | <b>286.1761</b> |           | 268.1656        | T    | 1338.6549       | <b>1351.6753</b> | 1353.6546 | 1384.6968        | 1367.6702        | 1366.6862      | 13 |
| 4  | 74.0600         | 359.2289  |           | 341.2183       | 387.2238        |           | <b>369.2132</b> | T    | 1237.6072       | 1250.6276        | 1252.6069 | 1283.6491        | 1266.6225        | 1265.6385      | 12 |
| 5  | <b>101.0709</b> | 487.2875  | 470.2609  | 469.2769       | <b>515.2824</b> | 498.2558  | <b>497.2718</b> | Q    | 1109.5486       | 1108.5534        |           | <b>1182.6014</b> | 1165.5749        | 1164.5908      | 11 |
| 6  | <b>70.0651</b>  | 584.3402  | 567.3137  | 566.3297       | 612.3351        | 595.3086  | 594.3246        | P    | 1012.4959       | 1011.5006        |           | <b>1054.5428</b> | <b>1037.5163</b> | 1036.5323      | 10 |
| 7  | 87.0553         | 698.3832  | 681.3566  | 680.3726       | 726.3781        | 709.3515  | 708.3675        | N    | 898.4530        | 897.4577         |           | 957.4901         | <b>940.4635</b>  | 939.4795       | 9  |
| 8  | 44.0495         | 769.4203  | 752.3937  | 751.4097       | <b>797.4152</b> | 780.3886  | 779.4046        | A    | 827.4158        |                  |           | <b>843.4471</b>  | 826.4206         | 825.4366       | 8  |
| 9  | <b>70.0651</b>  | 866.4730  | 849.4465  | 848.4625       | 894.4679        | 877.4414  | 876.4574        | P    | <b>730.3631</b> | 729.3678         |           | <b>772.4100</b>  | <b>755.3835</b>  | 754.3995       | 7  |
| 10 | 60.0444         | 953.5051  | 936.4785  | 935.4945       | 981.5000        | 964.4734  | 963.4894        | S    | 643.3311        | 642.3358         |           | 675.3573         | 658.3307         | 657.3467       | 6  |
| 11 | <b>159.0917</b> | 1139.5844 | 1122.5578 | 1121.5738      | 1167.5793       | 1150.5527 | 1149.5687       | W    | 457.2517        |                  |           | <b>588.3252</b>  | <b>571.2987</b>  |                | 5  |
| 12 | 30.0338         | 1196.6058 | 1179.5793 | 1178.5953      | 1224.6007       | 1207.5742 | 1206.5902       | G    |                 |                  |           | <b>402.2459</b>  | 385.2194         |                | 4  |
| 13 | 86.0964         | 1309.6899 | 1292.6633 | 1291.6793      | 1337.6848       | 1320.6583 | 1319.6742       | L    | 287.1462        | <b>286.1510</b>  |           | 345.2245         | 328.1979         |                | 3  |
| 14 | 30.0338         | 1366.7114 | 1349.6848 | 1348.7008      | 1394.7063       | 1377.6797 | 1376.6957       | G    |                 |                  |           | <b>232.1404</b>  | 215.1139         |                | 2  |
| 15 | 129.1135        |           |           |                |                 |           |                 | R    | 74.0237         | 73.0284          |           | <b>175.1190</b>  | 158.0924         |                | 1  |

| Seq     | ya              | yb              | Seq       | ya       | yb              | Seq      | ya       | yb              |
|---------|-----------------|-----------------|-----------|----------|-----------------|----------|----------|-----------------|
| LT      | 187.1441        | 215.1390        | LTT       | 288.1918 | 316.1867        | LTTQ     | 416.2504 | 444.2453        |
| LTTQP   | 513.3031        | 541.2980        | LTTQPN    | 627.3461 | 655.3410        | LTTQPNA  | 698.3832 | 726.3781        |
| TT      | <b>175.1077</b> | 203.1026        | TTQ       | 303.1663 | <b>331.1612</b> | TTQP     | 400.2191 | 428.2140        |
| TTQPN   | 514.2620        | 542.2569        | TTQPNA    | 585.2991 | 613.2940        | TTQP NAP | 682.3519 | 710.3468        |
| TQ      | 202.1186        | 230.1135        | TQP       | 299.1714 | 327.1663        | TQPN     | 413.2143 | 441.2092        |
| TQPNA   | 484.2514        | 512.2463        | TQP NAP   | 581.3042 | 609.2991        | TQP NAPS | 668.3362 | 696.3311        |
| QP      | 198.1237        | 226.1186        | QPN       | 312.1666 | 340.1615        | QPNA     | 383.2037 | 411.1987        |
| QPNAP   | 480.2565        | 508.2514        | QPNAPS    | 567.2885 | 595.2834        | PN       | 184.1081 | 212.1030        |
| PNA     | 255.1452        | <b>283.1401</b> | PNAP      | 352.1979 | 380.1928        | PNAPS    | 439.2300 | <b>467.2249</b> |
| PNAPSW  | <b>625.3093</b> | 653.3042        | PNAPSWG   | 682.3307 | 710.3256        | NA       | 158.0924 | 186.0873        |
| NAP     | 255.1452        | <b>283.1401</b> | NAPS      | 342.1772 | 370.1721        | NAPSW    | 528.2565 | 556.2514        |
| NAPSWG  | 585.2780        | 613.2729        | NAPSWG L  | 698.3620 | 726.3569        | AP       | 141.1022 | 169.0971        |
| APS     | 228.1343        | <b>256.1292</b> | APSW      | 414.2136 | 442.2085        | APSWG    | 471.2350 | 499.2299        |
| APSWG L | 584.3191        | 612.3140        | APSWG L G | 641.3406 | 669.3355        | PS       | 157.0972 | <b>185.0921</b> |
| PSW     | 343.1765        | 371.1714        | PSWG      | 400.1979 | 428.1928        | PSWGL    | 513.2820 | 541.2769        |
| PSWGL G | 570.3034        | 598.2984        | SW        | 246.1237 | 274.1186        | SWG      | 303.1452 | <b>331.1401</b> |
| SWGL    | 416.2292        | 444.2241        | SWGL G    | 473.2507 | 501.2456        | WG       | 216.1131 | 244.1080        |
| WGL     | 329.1972        | 357.1921        | WGL G     | 386.2187 | 414.2136        | GL       | 143.1179 | 171.1128        |
| GLG     | 200.1393        | 228.1343        | LG        | 143.1179 | 171.1128        |          |          |                 |

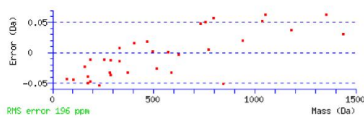

NCBI BLAST search of **ALTTQPNAPSWGLGR**  
 (Parameters: blastp, nr protein database, expect=20000, no filter, PAM30)  
 Other BLAST [web gateways](#)

Mascot: <http://www.matrixscience.com/>
