# Supplementary material for: An alternative for proteinase K-heat-sensitive protease from fungus Onygena corvina for biotechnology: cloning, engineering, expression, characterization and special application for protein sequencing
Source: PubMed Central journal article supplement (PMC7313183; doi:10.1186/s12934-020-01392-3), 2020-06-24
Supplement: 12934_2020_1392_MOESM15_ESM.pdf [file 12934_2020_1392_MOESM15_ESM.pdf]

Figure Supplementary 15-1: BLG digest with trypsin and matched protein sequence

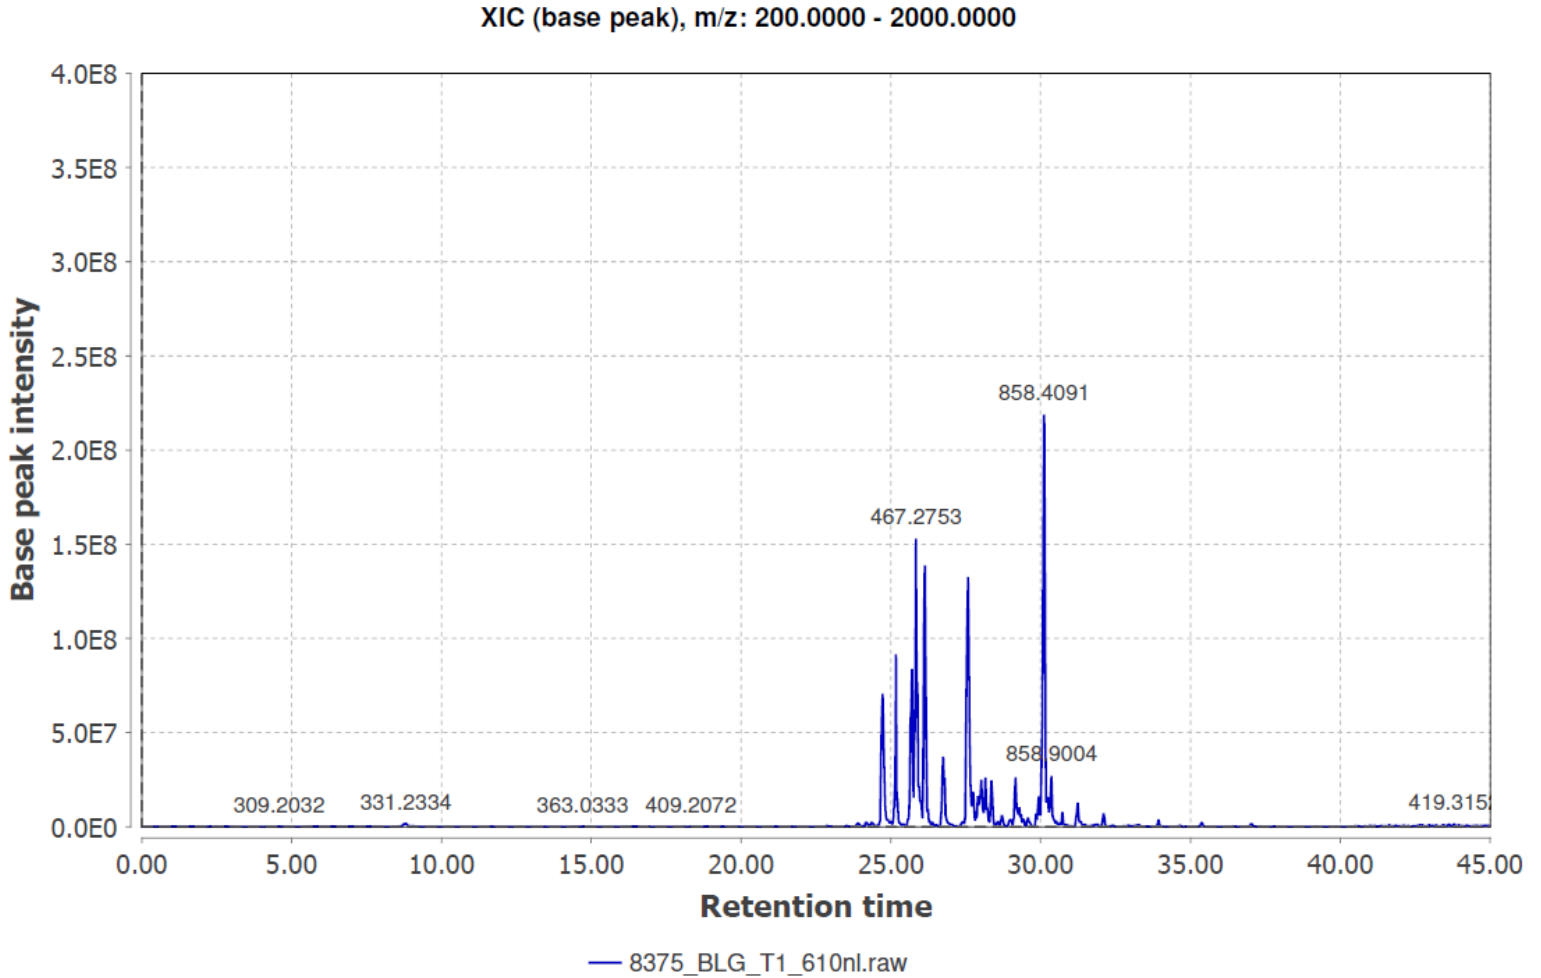

Sequence Coverage: 76%

Matched peptides shown in **Bold Red**

1 **LIVTQ**TMKGL **DIQK**VAGTWY SLAMAASDIS LLDAQSAPLR **VYVEELKPTP**  
51 **EGDLEILLQK** WENGECAQKK **IIAEKTKIPA** **VFKIDALNEN** **KVLVLDTDYK**  
101 **KYL**LFCMENS **AEPEQSLACQ** **CLVRTPEVDD** **EALEKFDKAL** **KALPMHIRLS**  
151 **FNPTQ**LEEQC HI

**Figure Supplementary 15-2: BLG digest with NHSSP-protease and matched protein sequence**

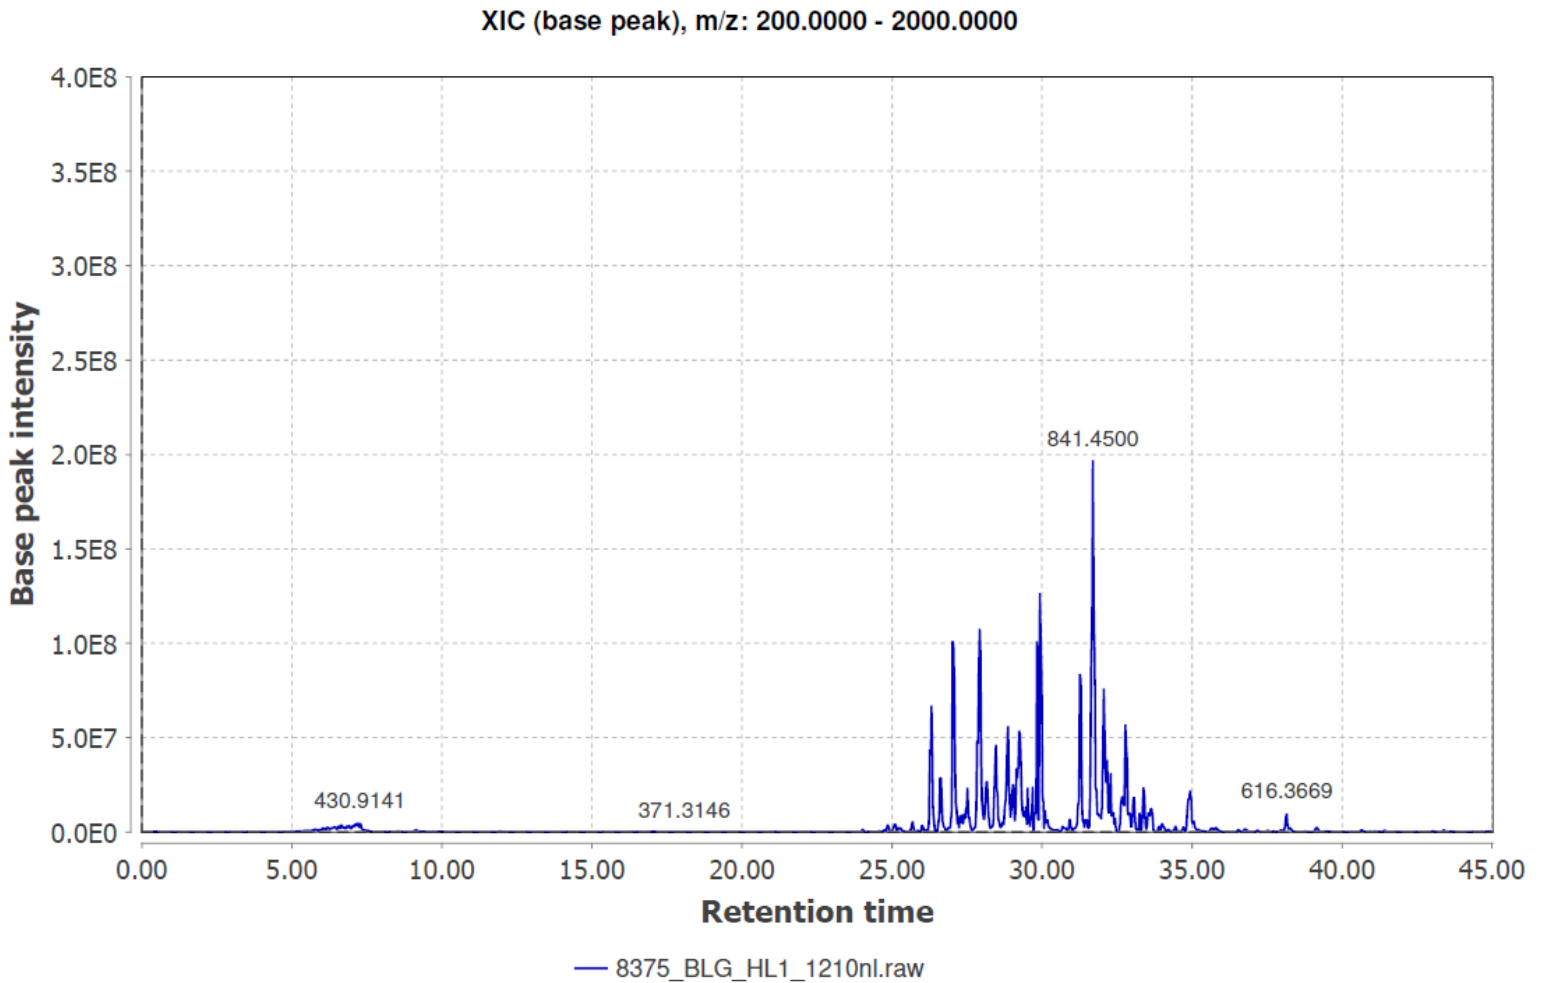

Sequence Coverage: **100%**

Matched peptides shown in **Bold Red**

**1 LIVTQTMKGL DIQKVAGTWY SLAMAASDIS LLDAQSAPLR VYVEELKPTP**  
**51 EGDLEILLQK WENGECAQKK IIAEKTKIPA VFKIDALNEN KVLVLDTDYK**  
**101 KYLLFCMENS AEPEQSLACQ CLVRTPEVDD EALEKFDKAL KALPMHIRLS**  
**151 FNPTQLEEQC HI**

Figure Supplementary 15-3: mAB digest with trypsin and matched protein sequences

XIC (base peak), m/z: 200.0000 - 2000.0000

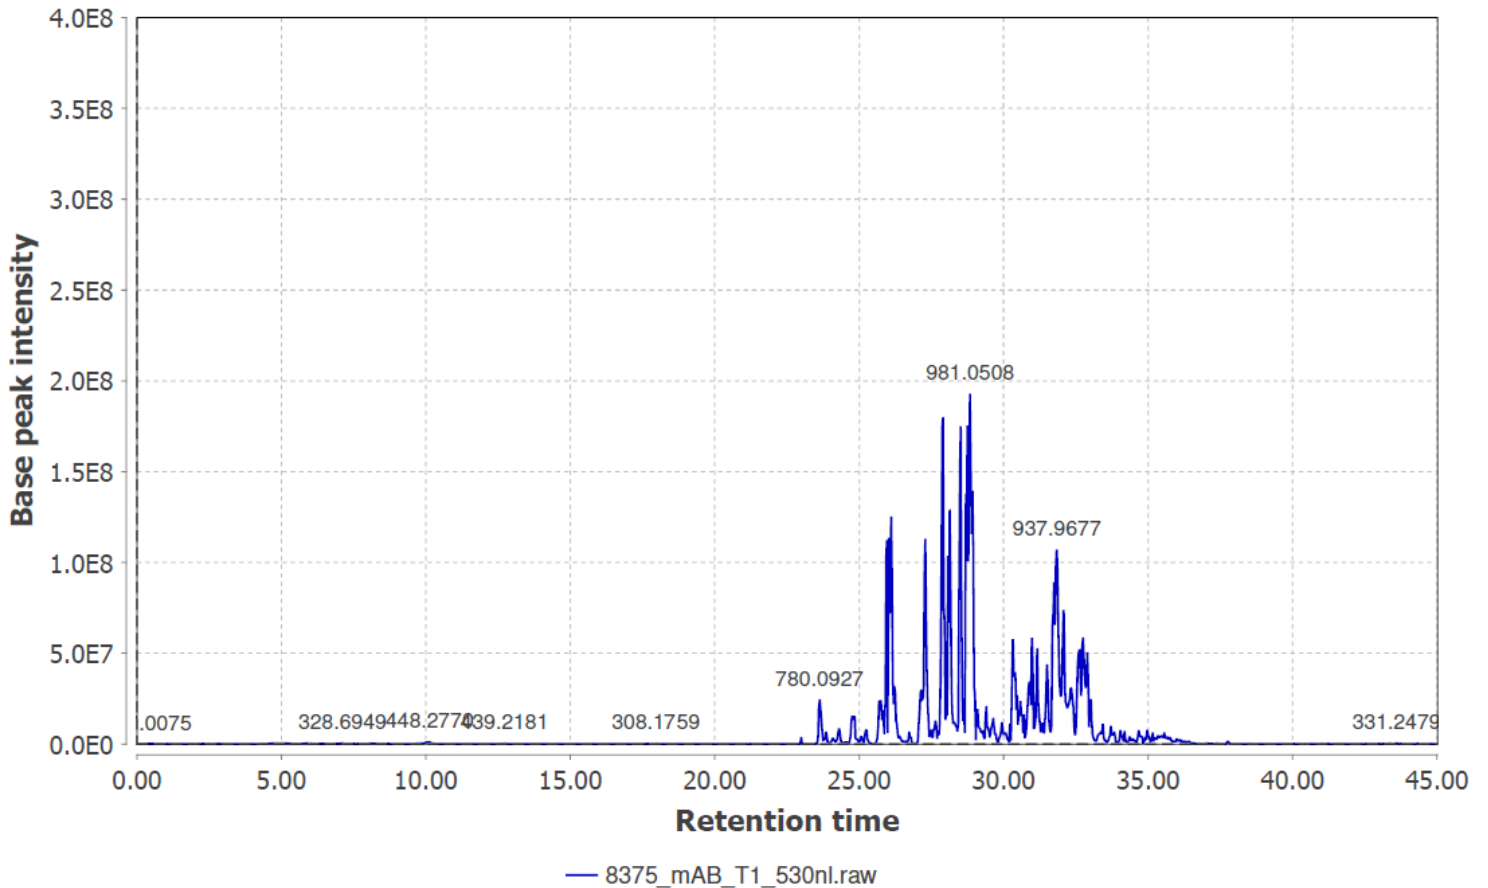

mAB heavy chain: Sequence Coverage: 64%

Matched peptides shown in **Bold Red**

```

1 QVQLQQPGAE LVKPGASVKM SCKASGYTFT SYNMHWVKQT PGRGLEWIGA
51 IYPGNGDTSY NQKFKGKATL TADKSSSTAY MQLSSLTSED SAVYYCARST
101 YGGDWYFNV WGAGTTVTVS AASTKGPSVF PLAPSSKSTS GGTAALGCLV
151 KDYFPEPVTV SWNSGALTSG VHTFPAVLQS SGLYSLSSV TVPSSSLGTQ
201 TYICNVNHKP SNTKVDKKVE PKSCDKTHTC PPCPAPELLG GPSVFLFPPK
251 PKDTLMISRT PEVTCVVVDV SHEDPEVKFN WYVDGVEVHN AKTKPREEQY
301 NSTYRVVSVL TVLHQDWLNG KEYKCKVSNK ALPAPIEKTI SKAKGQPREP
351 QVYTLPPSRD ELTKNQVSLT CLVKGFYPSD IAVEWESNGQ PENNYKTTPP
401 VLDSGDSFFL YSKLTVDKSR WQQGNVFSCS VMHEALHNHY TQKLSLSLSPG
451 K

```

mAB light chain: Sequence Coverage: 71%

Matched peptides shown in **Bold Red**

```

1 QIVLSQSPAI LSASPGEKVT MTCRASSSVS YIHWFQQKPG SSPKPWIYAT
51 SNLASGVPVR FSGSGSGTSY SLTISRVEAE DAATYYCQQW TSNPPTFGGG
101 TKLEIKRTVA APSVFIFPPS DEQLKSGTAS VVCLLNNFYP REAKVQWKVD
151 NALQSGNSQE SVTEQDSKDS TYSLSSTLTL SKADYEKHKV YACEVTHQGL
201 SSPVTKSFNR GEC

```

**Figure Supplementary 15-4: mAB digest with NHSSP-protease and matched protein sequences**

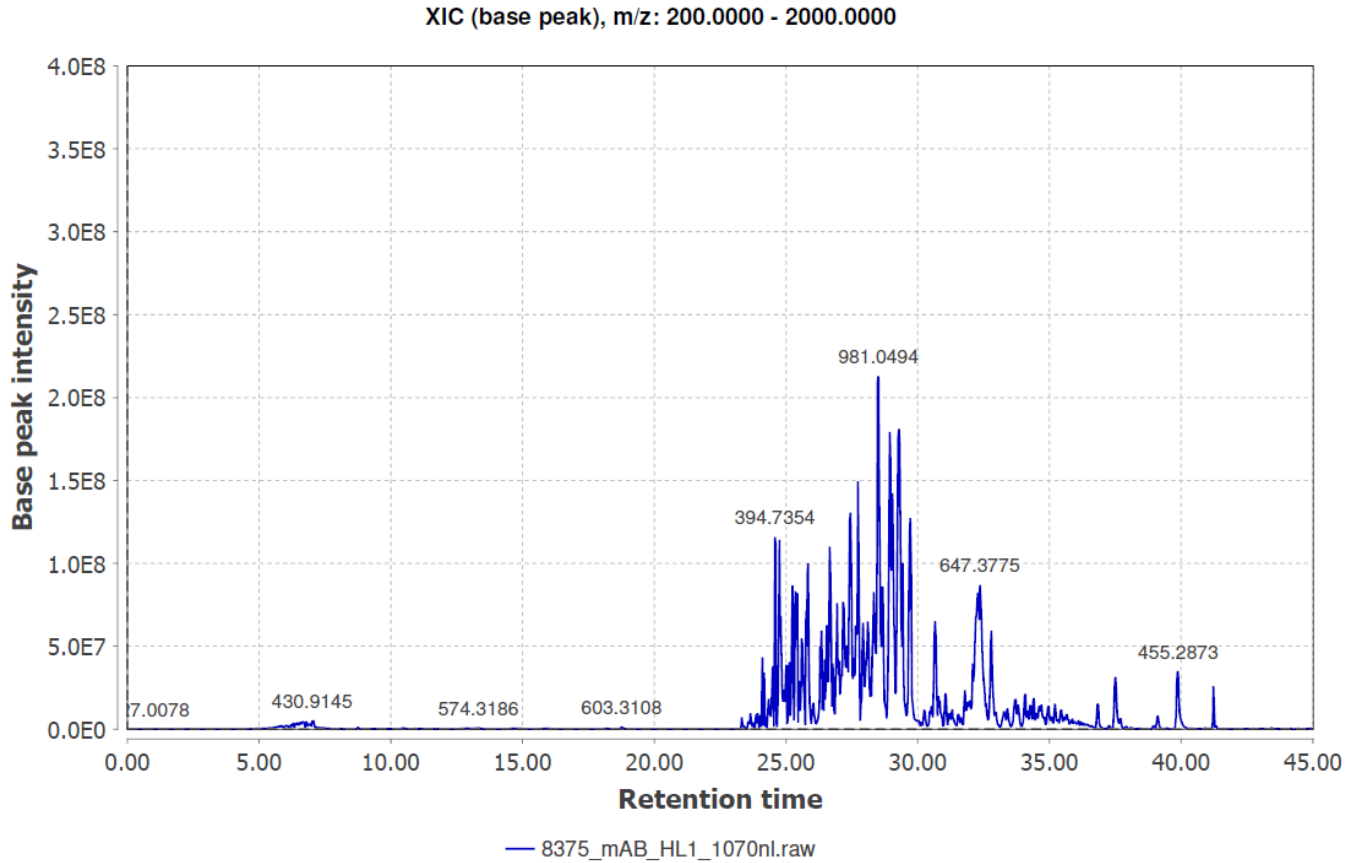

mAB heavy chain: Sequence Coverage: **84%**

Matched peptides shown in **Bold Red**

```

1 QVQLQQPGAE LVKPGASVKM SCKASGYTFT SYNMHWVKQT PGRGLEWIGA
51 IYPGNGDTSY NQKFKGKATL TADKSSSTAY MQLSSLTSED SAVYYCARST
101 YGGDWYFNV WGAGTTVTVS AASTKGPSVF PLAPSSKSTS GGTAALGCLV
151 KDYFPEPVTV SWNSGALTSG VHTFPAVLQS SGLYSLSSVV TVPSSSLGTQ
201 TYICNVNHKP SNTKVDKKVE PKSCDKHTC PPCPAPELLG GPSVFLFPPK
251 PKDTLMISRT PEVTCVVVDV SHEDPEVKFN WYVDGVEVHN AKTKPREEQY
301 NSTYRVVSVL TVLHQDWLNG KEYKCKVSNK ALPAPIEKTI SKAKGQPREP
351 QVYTLPPSRD ELTKNQVSLT CLVKGFYPSD IAVEWESNGQ PENNYKTTTP
401 VLDSGDGFLL YSKLTVDKSR WQQGNVFSCS VMHEALHNHY TQKSLSLSPG
451 K

```

mAB light chain: Sequence Coverage: **96%**

Matched peptides shown in **Bold Red**

```

1 QIVLSQSPAI LSASPGEKVT MTCRASSSVS YIHWFQQKPG SSPKPWIYAT
51 SNLASGVPVR FSGSGGTSY SLTISRVEAE DAATYYCQQW TSNPPTFGGG
101 TKLEIKRTVA APSVFIFPPS DEQLKSGTAS VVCLLNNFYP REAKVQWKVD
151 NALQSGNSQE SVTEQDSKDS TYSLSSTLTL SKADYEKHKV YACEVTHQGL
201 SSPVTKSFNR GEC

```

**Figure Supplementary 15-5:** cleavage around bitter peptide region of  $\beta$ -lactalbumin

| START - END OBSERVED | MR(EXPT)    | MR(CALC)   | DELTA  | MISS | SEQUENCE                          |
|----------------------|-------------|------------|--------|------|-----------------------------------|
| 70 - 82486.6409      | 1456.9010   | 1456.9017  | 0.0007 | 0    | K.KIIAEKTKIPAVF.K (Ions score 38) |
| 70 - 82486.6411      | 1456.9014 1 | 456.9017 - | 0.0003 | 0    | K.KIIAEKTKIPAVF.K (Ions score 24) |
| 70 - 82 486.6411     | 1456.9016 1 | 456.9017 - | 0.0001 | 0    | K.KIIAEKTKIPAVF.K (Ions score 27) |
| 70 - 82486.6416      | 1456.9030 1 | 456.9017   | 0.0013 | 0    | K.KIIAEKTKIPAVF.K (Ions score 28) |
| 71 - 82665.4109      | 1328.8073 1 | 328.8067   | 0.0006 | 0    | K.IIAEKTKIPAVF.K (Ions score 38)  |
| 73 - 82552.3264      | 1102.6383 1 | 102.6386 - | 0.0003 | 0    | I.AEKTKIPAVF.K (Ions score 33)    |
| 74 - 82516.8077      | 1031.6009 1 | 031.6015 - | 0.0006 | 0    | A.EKTKIPAVF.K (Ions score 41)     |
| 74 - 82516.8078      | 1031.6010 1 | 031.6015 - | 0.0004 | 0    | A.EKTKIPAVF.K (Ions score 25)     |
| 74 - 82516.8080      | 1031.6014 1 | 031.6015 - | 0.0001 | 0    | A.EKTKIPAVF.K (Ions score 35)     |
| 74 - 82516.8081      | 1031.6017 1 | 031.6015   | 0.0002 | 0    | A.EKTKIPAVF.K (Ions score 44)     |
| 74 - 82516.8082      | 1031.6019 1 | 031.6015   | 0.0004 | 0    | A.EKTKIPAVF.K (Ions score 43)     |
| 74 - 82516.8083      | 1031.6020 1 | 031.6015   | 0.0005 | 0    | A.EKTKIPAVF.K (Ions score 50)     |
| 74 - 82516.8083      | 1031.6020 1 | 031.6015   | 0.0005 | 0    | A.EKTKIPAVF.K (Ions score 36)     |
| 74 - 82516.8083      | 1031.6020 1 | 031.6015   | 0.0005 | 0    | A.EKTKIPAVF.K (Ions score 22)     |
| 74 - 82516.8084      | 1031.6023 1 | 031.6015   | 0.0008 | 0    | A.EKTKIPAVF.K (Ions score 50)     |
| 74 - 82516.8085      | 1031.6024 1 | 031.6015   | 0.0009 | 0    | A.EKTKIPAVF.K (Ions score 45)     |
| 74 - 82516.8085      | 1031.6025 1 | 031.6015   | 0.0010 | 0    | A.EKTKIPAVF.K (Ions score 43)     |
| 74 - 83387.5727      | 1159.6963 1 | 159.6964 - | 0.0001 | 0    | A.EKTKIPAVFK.I (Ions score 23)    |
| 75 - 82452.2862      | 902.5578    | 902.5589 - | 0.0011 | 0    | E.KTKIPAVF.K (Ions score 29)      |
| 75 - 82452.2866      | 902.5586    | 902.5589 - | 0.0003 | 0    | E.KTKIPAVF.K (Ions score 34)      |
| 75 - 82452.2866      | 902.5587    | 902.5589 - | 0.0002 | 0    | E.KTKIPAVF.K (Ions score 31)      |
| 76 - 83301.8600      | 902.5582    | 902.5589 - | 0.0007 | 0    | K.TKIPAVFK.I (Ions score 28)      |
| 76 - 83301.8600      | 902.5582    | 902.5589 - | 0.0007 | 0    | K.TKIPAVFK.I (Ions score 29)      |
| 76 - 83301.8602      | 902.5589    | 902.5589 - | 0.0000 | 0    | K.TKIPAVFK.I (Ions score 38)      |
| 77 - 82337.7151      | 673.4157    | 673.4163 - | 0.0005 | 0    | T.KIPAVF.K (Ions score 32)        |
| 77 - 82337.7153      | 673.4161    | 673.4163 - | 0.0001 | 0    | T.KIPAVF.K (Ions score 23)        |
| 81 - 85311.1838      | 620.3531    | 620.3533 - | 0.0002 | 0    | A.VFKID.A (Ions score 33)         |
| 81 - 85 311.1839     | 620.3533    | 620.3533 - | 0.0000 | 0    | A.VFKID.A (Ions score 33)         |
| 83 - 87559.3448      | 558.3376    | 558.3377 - | 0.0001 | 0    | F.KIDAL (Ions score 29)           |
