# Supplementary material for: An alternative for proteinase K-heat-sensitive protease from fungus Onygena corvina for biotechnology: cloning, engineering, expression, characterization and special application for protein sequencing
Source: PubMed Central journal article supplement (PMC7313183; doi:10.1186/s12934-020-01392-3), 2020-06-24
Supplement: 12934_2020_1392_MOESM16_ESM.pdf [file 12934_2020_1392_MOESM16_ESM.pdf]

**MASCOT** SCIENCE Mascot Search Results

**Protein View**

Match to: **BLG** Score: **5255**

Found in search of \\SERVER3\User\Kunden\_Projekte\Koller\_8375\Further-characterization-part-I\8375\_BLG\_HL1\_1210n1.mgf

Nominal mass (M<sub>r</sub>): **18555**; Calculated pI value: **4.83**

NCBI BLAST search of **BLG** against nr

Unformatted [sequence string](#) for pasting into other applications

Fixed modifications: Carbamidomethyl (C)

Variable modifications: Oxidation (M)

No enzyme cleavage specificity

Sequence Coverage: **100%**

Matched peptides shown in **Bold Red**

- 1** LIVTQTMKGL DIQKVAGTWY SLAMAASDIS LLDAQSAPLR VYVEELKPTP
- 51** EGDLEILLQK WENGECAQKK IIAEKTRIPA VFKIDALNEN KVLVLDTDYK
- 101** KYLLFCMENS AEPEQSLACQ CLVRTPEVDD EALEKFDKAL KALPMHIRLS
- 151** FNPTQLEEQC HI

Sort Peptides By  Residue Number  Increasing Mass  Decreasing Mass

| Start - End | Observed | Mr (expt) | Mr (calc) | Delta   | Miss | Sequence                                                             |
|-------------|----------|-----------|-----------|---------|------|----------------------------------------------------------------------|
| 1 - 5       | 573.3610 | 572.3537  | 572.3533  | 0.0004  | 0    | -.LIVTQ.T ( <a href="#">Ions score 26</a> )                          |
| 1 - 8       | 467.2752 | 932.5358  | 932.5365  | -0.0007 | 0    | -.LIVTQTMK.G ( <a href="#">Ions score 21</a> )                       |
| 1 - 8       | 467.2754 | 932.5363  | 932.5365  | -0.0002 | 0    | -.LIVTQTMK.G ( <a href="#">Ions score 64</a> )                       |
| 1 - 8       | 467.2756 | 932.5366  | 932.5365  | 0.0001  | 0    | -.LIVTQTMK.G ( <a href="#">Ions score 61</a> )                       |
| 1 - 10      | 552.3282 | 1102.6418 | 1102.6420 | -0.0002 | 0    | -.LIVTQTMKGL.D ( <a href="#">Ions score 34</a> )                     |
| 1 - 10      | 552.3285 | 1102.6424 | 1102.6420 | 0.0004  | 0    | -.LIVTQTMKGL.D ( <a href="#">Ions score 58</a> )                     |
| 1 - 10      | 552.3286 | 1102.6427 | 1102.6420 | 0.0007  | 0    | -.LIVTQTMKGL.D ( <a href="#">Ions score 61</a> )                     |
| 1 - 10      | 552.3287 | 1102.6429 | 1102.6420 | 0.0009  | 0    | -.LIVTQTMKGL.D ( <a href="#">Ions score 58</a> )                     |
| 1 - 10      | 560.3242 | 1118.6339 | 1118.6369 | -0.0030 | 0    | -.LIVTQTMKGL.D Oxidation (M) ( <a href="#">Ions score 32</a> )       |
| 1 - 10      | 560.3243 | 1118.6340 | 1118.6369 | -0.0029 | 0    | -.LIVTQTMKGL.D Oxidation (M) ( <a href="#">Ions score 28</a> )       |
| 1 - 13      | 730.4138 | 1458.8131 | 1458.8116 | 0.0015  | 0    | -.LIVTQTMKGLDIQ.K ( <a href="#">Ions score 73</a> )                  |
| 1 - 13      | 730.4141 | 1458.8136 | 1458.8116 | 0.0020  | 0    | -.LIVTQTMKGLDIQ.K ( <a href="#">Ions score 51</a> )                  |
| 1 - 13      | 730.4142 | 1458.8139 | 1458.8116 | 0.0024  | 0    | -.LIVTQTMKGLDIQ.K ( <a href="#">Ions score 21</a> )                  |
| 1 - 13      | 730.4142 | 1458.8139 | 1458.8116 | 0.0024  | 0    | -.LIVTQTMKGLDIQ.K ( <a href="#">Ions score 80</a> )                  |
| 1 - 13      | 730.4144 | 1458.8142 | 1458.8116 | 0.0026  | 0    | -.LIVTQTMKGLDIQ.K ( <a href="#">Ions score 21</a> )                  |
| 1 - 13      | 730.4144 | 1458.8142 | 1458.8116 | 0.0026  | 0    | -.LIVTQTMKGLDIQ.K ( <a href="#">Ions score 22</a> )                  |
| 1 - 13      | 730.4144 | 1458.8142 | 1458.8116 | 0.0026  | 0    | -.LIVTQTMKGLDIQ.K ( <a href="#">Ions score 20</a> )                  |
| 1 - 13      | 730.4145 | 1458.8144 | 1458.8116 | 0.0029  | 0    | -.LIVTQTMKGLDIQ.K ( <a href="#">Ions score 94</a> )                  |
| 1 - 13      | 730.4145 | 1458.8144 | 1458.8116 | 0.0029  | 0    | -.LIVTQTMKGLDIQ.K ( <a href="#">Ions score 59</a> )                  |
| 1 - 13      | 738.4110 | 1474.8075 | 1474.8065 | 0.0010  | 0    | -.LIVTQTMKGLDIQ.K Oxidation (M) ( <a href="#">Ions score 73</a> )    |
| 1 - 13      | 738.4113 | 1474.8080 | 1474.8065 | 0.0015  | 0    | -.LIVTQTMKGLDIQ.K Oxidation (M) ( <a href="#">Ions score 38</a> )    |
| 1 - 13      | 738.4113 | 1474.8081 | 1474.8065 | 0.0016  | 0    | -.LIVTQTMKGLDIQ.K Oxidation (M) ( <a href="#">Ions score 74</a> )    |
| 1 - 13      | 738.4113 | 1474.8081 | 1474.8065 | 0.0016  | 0    | -.LIVTQTMKGLDIQ.K Oxidation (M) ( <a href="#">Ions score 72</a> )    |
| 1 - 13      | 738.4114 | 1474.8082 | 1474.8065 | 0.0017  | 0    | -.LIVTQTMKGLDIQ.K Oxidation (M) ( <a href="#">Ions score 55</a> )    |
| 1 - 13      | 738.4114 | 1474.8083 | 1474.8065 | 0.0018  | 0    | -.LIVTQTMKGLDIQ.K Oxidation (M) ( <a href="#">Ions score 76</a> )    |
| 1 - 13      | 738.4116 | 1474.8086 | 1474.8065 | 0.0021  | 0    | -.LIVTQTMKGLDIQ.K Oxidation (M) ( <a href="#">Ions score 57</a> )    |
| 1 - 13      | 738.4116 | 1474.8086 | 1474.8065 | 0.0021  | 0    | -.LIVTQTMKGLDIQ.K Oxidation (M) ( <a href="#">Ions score 29</a> )    |
| 1 - 13      | 738.4116 | 1474.8087 | 1474.8065 | 0.0022  | 0    | -.LIVTQTMKGLDIQ.K Oxidation (M) ( <a href="#">Ions score 61</a> )    |
| 1 - 16      | 586.6790 | 1757.0150 | 1757.0120 | 0.0030  | 0    | -.LIVTQTMKGLDIQKVA.G ( <a href="#">Ions score 42</a> )               |
| 1 - 16      | 592.0098 | 1773.0075 | 1773.0070 | 0.0005  | 0    | -.LIVTQTMKGLDIQKVA.G Oxidation (M) ( <a href="#">Ions score 50</a> ) |
| 1 - 16      | 592.0098 | 1773.0077 | 1773.0070 | 0.0007  | 0    | -.LIVTQTMKGLDIQKVA.G Oxidation (M) ( <a href="#">Ions score 45</a> ) |
| 1 - 16      | 592.0099 | 1773.0080 | 1773.0070 | 0.0011  | 0    | -.LIVTQTMKGLDIQKVA.G Oxidation (M) ( <a href="#">Ions score 54</a> ) |
| 1 - 16      | 592.0099 | 1773.0080 | 1773.0070 | 0.0011  | 0    | -.LIVTQTMKGLDIQKVA.G Oxidation (M) ( <a href="#">Ions score 22</a> ) |
| 1 - 16      | 887.5118 | 1773.0091 | 1773.0070 | 0.0022  | 0    | -.LIVTQTMKGLDIQKVA.G Oxidation (M) ( <a href="#">Ions score 31</a> ) |
| 5 - 10      | 339.1859 | 676.3573  | 676.3578  | -0.0005 | 0    | T.QTMKGL.D ( <a href="#">Ions score 28</a> )                         |
| 5 - 13      | 525.2683 | 1048.5221 | 1048.5223 | -0.0002 | 0    | T.QTMKGLDIQ.K Oxidation (M) ( <a href="#">Ions score 24</a> )        |
| 5 - 13      | 525.2685 | 1048.5224 | 1048.5223 | 0.0002  | 0    | T.QTMKGLDIQ.K Oxidation (M) ( <a href="#">Ions score 32</a> )        |
| 5 - 16      | 666.3712 | 1330.7279 | 1330.7278 | 0.0001  | 0    | T.QTMKGLDIQKVA.G ( <a href="#">Ions score 27</a> )                   |
| 6 - 13      | 453.2414 | 904.4682  | 904.4688  | -0.0006 | 0    | Q.TMKGLDIQ.K ( <a href="#">Ions score 34</a> )                       |
| 6 - 13      | 453.2414 | 904.4683  | 904.4688  | -0.0005 | 0    | Q.TMKGLDIQ.K ( <a href="#">Ions score 22</a> )                       |
| 6 - 13      | 453.2415 | 904.4684  | 904.4688  | -0.0004 | 0    | Q.TMKGLDIQ.K ( <a href="#">Ions score 40</a> )                       |
| 6 - 13      | 453.2416 | 904.4687  | 904.4688  | -0.0001 | 0    | Q.TMKGLDIQ.K ( <a href="#">Ions score 31</a> )                       |
| 6 - 13      | 453.2417 | 904.4688  | 904.4688  | 0.0000  | 0    | Q.TMKGLDIQ.K ( <a href="#">Ions score 27</a> )                       |
| 6 - 13      | 453.2417 | 904.4688  | 904.4688  | 0.0001  | 0    | Q.TMKGLDIQ.K ( <a href="#">Ions score 46</a> )                       |
| 6 - 13      | 453.2417 | 904.4688  | 904.4688  | 0.0001  | 0    | Q.TMKGLDIQ.K ( <a href="#">Ions score 42</a> )                       |
| 6 - 13      | 453.2418 | 904.4690  | 904.4688  | 0.0002  | 0    | Q.TMKGLDIQ.K ( <a href="#">Ions score 44</a> )                       |
| 6 - 13      | 453.2419 | 904.4693  | 904.4688  | 0.0006  | 0    | Q.TMKGLDIQ.K ( <a href="#">Ions score 45</a> )                       |
| 6 - 13      | 461.2388 | 920.4630  | 920.4637  | -0.0007 | 0    | Q.TMKGLDIQ.K Oxidation (M) ( <a href="#">Ions score 28</a> )         |
| 6 - 13      | 461.2388 | 920.4631  | 920.4637  | -0.0006 | 0    | Q.TMKGLDIQ.K Oxidation (M) ( <a href="#">Ions score 39</a> )         |
| 6 - 13      | 461.2390 | 920.4634  | 920.4637  | -0.0003 | 0    | Q.TMKGLDIQ.K Oxidation (M) ( <a href="#">Ions score 30</a> )         |
| 6 - 13      | 461.2391 | 920.4637  | 920.4637  | -0.0000 | 0    | Q.TMKGLDIQ.K Oxidation (M) ( <a href="#">Ions score 40</a> )         |
| 6 - 16      | 602.3417 | 1202.6688 | 1202.6692 | -0.0005 | 0    | Q.TMKGLDIQKVA.G ( <a href="#">Ions score 39</a> )                    |
| 6 - 16      | 602.3419 | 1202.6692 | 1202.6692 | -0.0001 | 0    | Q.TMKGLDIQKVA.G ( <a href="#">Ions score 43</a> )                    |
| 6 - 16      | 602.3419 | 1202.6693 | 1202.6692 | 0.0000  | 0    | Q.TMKGLDIQKVA.G ( <a href="#">Ions score 41</a> )                    |
| 6 - 18      | 454.5865 | 1360.7376 | 1360.7384 | -0.0008 | 0    | Q.TMKGLDIQKVAGT.W ( <a href="#">Ions score 33</a> )                  |
| 9 - 16      | 422.2502 | 842.4858  | 842.4861  | -0.0004 | 0    | K.GLDIQKVA.G ( <a href="#">Ions score 35</a> )                       |
| 9 - 16      | 422.2502 | 842.4859  | 842.4861  | -0.0002 | 0    | K.GLDIQKVA.G ( <a href="#">Ions score 25</a> )                       |
| 10 - 16     | 393.7396 | 785.4646  | 785.4647  | -0.0001 | 0    | G.LDIQKVA.G ( <a href="#">Ions score 30</a> )                        |
| 11 - 16     | 673.3876 | 672.3804  | 672.3806  | -0.0003 | 0    | L.DIQKVA.G ( <a href="#">Ions score 38</a> )                         |
| 11 - 16     | 337.1975 | 672.3804  | 672.3806  | -0.0002 | 0    | L.DIQKVA.G ( <a href="#">Ions score 26</a> )                         |
| 11 - 16     | 337.1976 | 672.3807  | 672.3806  | 0.0001  | 0    | L.DIQKVA.G ( <a href="#">Ions score 23</a> )                         |
| 11 - 18     | 416.2318 | 830.4491  | 830.4498  | -0.0007 | 0    | L.DIQKVAGT.W ( <a href="#">Ions score 30</a> )                       |
| 11 - 18     | 416.2321 | 830.4496  | 830.4498  | -0.0001 | 0    | L.DIQKVAGT.W ( <a href="#">Ions score 38</a> )                       |

|         |           |           |           |         |   |                          |                                                 |
|---------|-----------|-----------|-----------|---------|---|--------------------------|-------------------------------------------------|
| 11 - 22 | 690.8621  | 1379.7096 | 1379.7085 | 0.0011  | 0 | L.DIQKVAGTWYSL.A         | ( <a href="#">Ions score 58</a> )               |
| 11 - 23 | 726.3803  | 1450.7461 | 1450.7456 | 0.0005  | 0 | L.DIQKVAGTWYSLA.M        | ( <a href="#">Ions score 56</a> )               |
| 11 - 23 | 726.3803  | 1450.7461 | 1450.7456 | 0.0005  | 0 | L.DIQKVAGTWYSLA.M        | ( <a href="#">Ions score 59</a> )               |
| 11 - 24 | 791.9008  | 1581.7871 | 1581.7861 | 0.0010  | 0 | L.DIQKVAGTWYSLAM.A       | ( <a href="#">Ions score 88</a> )               |
| 11 - 24 | 791.9009  | 1581.7872 | 1581.7861 | 0.0011  | 0 | L.DIQKVAGTWYSLAM.A       | ( <a href="#">Ions score 68</a> )               |
| 11 - 25 | 827.4194  | 1652.8243 | 1652.8232 | 0.0011  | 0 | L.DIQKVAGTWYSLAMA.A      | ( <a href="#">Ions score 75</a> )               |
| 14 - 22 | 512.7766  | 1023.5385 | 1023.5389 | -0.0003 | 0 | Q.KVAGTWYSL.A            | ( <a href="#">Ions score 27</a> )               |
| 14 - 22 | 512.7768  | 1023.5390 | 1023.5389 | 0.0001  | 0 | Q.KVAGTWYSL.A            | ( <a href="#">Ions score 50</a> )               |
| 14 - 22 | 512.7770  | 1023.5394 | 1023.5389 | 0.0005  | 0 | Q.KVAGTWYSL.A            | ( <a href="#">Ions score 50</a> )               |
| 14 - 23 | 548.2949  | 1094.5753 | 1094.5760 | -0.0007 | 0 | Q.KVAGTWYSLA.M           | ( <a href="#">Ions score 60</a> )               |
| 14 - 23 | 548.2953  | 1094.5760 | 1094.5760 | 0.0000  | 0 | Q.KVAGTWYSLA.M           | ( <a href="#">Ions score 40</a> )               |
| 14 - 23 | 548.2953  | 1094.5761 | 1094.5760 | 0.0001  | 0 | Q.KVAGTWYSLA.M           | ( <a href="#">Ions score 48</a> )               |
| 14 - 24 | 613.8160  | 1225.6175 | 1225.6165 | 0.0010  | 0 | Q.KVAGTWYSLAM.A          | ( <a href="#">Ions score 62</a> )               |
| 14 - 24 | 613.8171  | 1225.6197 | 1225.6165 | 0.0032  | 0 | Q.KVAGTWYSLAM.A          | ( <a href="#">Ions score 56</a> )               |
| 14 - 27 | 728.3672  | 1454.7198 | 1454.7227 | -0.0029 | 0 | Q.KVAGTWYSLAMAAS.D       | ( <a href="#">Ions score 34</a> )               |
| 17 - 22 | 726.3460  | 725.3387  | 725.3384  | 0.0003  | 0 | A.GTWYSL.A               | ( <a href="#">Ions score 22</a> )               |
| 17 - 23 | 797.3834  | 796.3761  | 796.3755  | 0.0006  | 0 | A.GTWYSLA.M              | ( <a href="#">Ions score 22</a> )               |
| 17 - 25 | 500.2339  | 998.4533  | 998.4531  | 0.0002  | 0 | A.GTWYSLAMA.A            | ( <a href="#">Ions score 52</a> )               |
| 19 - 23 | 639.3137  | 638.3064  | 638.3064  | -0.0000 | 0 | T.WYSLA.M                | ( <a href="#">Ions score 21</a> )               |
| 19 - 23 | 639.3138  | 638.3066  | 638.3064  | 0.0002  | 0 | T.WYSLA.M                | ( <a href="#">Ions score 20</a> )               |
| 19 - 23 | 639.3140  | 638.3067  | 638.3064  | 0.0004  | 0 | T.WYSLA.M                | ( <a href="#">Ions score 20</a> )               |
| 19 - 24 | 770.3536  | 769.3464  | 769.3469  | -0.0005 | 0 | T.WYSLAM.A               | ( <a href="#">Ions score 21</a> )               |
| 22 - 31 | 504.2578  | 1006.5010 | 1006.5005 | 0.0005  | 0 | S.LAMAASDISL.L           | Oxidation (M) ( <a href="#">Ions score 22</a> ) |
| 23 - 42 | 1046.5430 | 2091.0714 | 2091.0670 | 0.0044  | 0 | L.AMAASDISLLDAQSAPLRVY.V | ( <a href="#">Ions score 79</a> )               |
| 24 - 35 | 617.8024  | 1233.5903 | 1233.5911 | -0.0008 | 0 | A.MAASDISLLDAQ.S         | ( <a href="#">Ions score 43</a> )               |
| 24 - 35 | 617.8027  | 1233.5909 | 1233.5911 | -0.0002 | 0 | A.MAASDISLLDAQ.S         | ( <a href="#">Ions score 50</a> )               |
| 24 - 35 | 617.8029  | 1233.5913 | 1233.5911 | 0.0002  | 0 | A.MAASDISLLDAQ.S         | ( <a href="#">Ions score 64</a> )               |
| 24 - 35 | 617.8029  | 1233.5913 | 1233.5911 | 0.0002  | 0 | A.MAASDISLLDAQ.S         | ( <a href="#">Ions score 44</a> )               |
| 24 - 42 | 1011.0228 | 2020.0310 | 2020.0299 | 0.0011  | 0 | A.MAASDISLLDAQSAPLRVY.V  | ( <a href="#">Ions score 61</a> )               |
| 24 - 42 | 1011.0231 | 2020.0316 | 2020.0299 | 0.0017  | 0 | A.MAASDISLLDAQSAPLRVY.V  | ( <a href="#">Ions score 40</a> )               |
| 24 - 42 | 1011.0241 | 2020.0337 | 2020.0299 | 0.0038  | 0 | A.MAASDISLLDAQSAPLRVY.V  | ( <a href="#">Ions score 40</a> )               |
| 25 - 32 | 789.4359  | 788.4286  | 788.4280  | 0.0006  | 0 | M.AASDISLL.D             | ( <a href="#">Ions score 23</a> )               |
| 25 - 35 | 552.2824  | 1102.5503 | 1102.5506 | -0.0003 | 0 | M.AASDISLLDAQ.S          | ( <a href="#">Ions score 54</a> )               |
| 25 - 35 | 552.2826  | 1102.5506 | 1102.5506 | 0.0000  | 0 | M.AASDISLLDAQ.S          | ( <a href="#">Ions score 43</a> )               |
| 25 - 35 | 552.2828  | 1102.5510 | 1102.5506 | 0.0004  | 0 | M.AASDISLLDAQ.S          | ( <a href="#">Ions score 30</a> )               |
| 25 - 42 | 945.5029  | 1888.9913 | 1888.9894 | 0.0019  | 0 | M.AASDISLLDAQSAPLRVY.V   | ( <a href="#">Ions score 48</a> )               |
| 25 - 42 | 945.5030  | 1888.9914 | 1888.9894 | 0.0020  | 0 | M.AASDISLLDAQSAPLRVY.V   | ( <a href="#">Ions score 40</a> )               |
| 25 - 42 | 945.5035  | 1888.9925 | 1888.9894 | 0.0031  | 0 | M.AASDISLLDAQSAPLRVY.V   | ( <a href="#">Ions score 85</a> )               |
| 25 - 42 | 945.5040  | 1888.9935 | 1888.9894 | 0.0041  | 0 | M.AASDISLLDAQSAPLRVY.V   | ( <a href="#">Ions score 59</a> )               |
| 26 - 35 | 516.7640  | 1031.5135 | 1031.5135 | 0.0000  | 0 | A.ASDISLLDAQ.S           | ( <a href="#">Ions score 21</a> )               |
| 26 - 35 | 516.7647  | 1031.5149 | 1031.5135 | 0.0014  | 0 | A.ASDISLLDAQ.S           | ( <a href="#">Ions score 68</a> )               |
| 26 - 39 | 700.8675  | 1399.7204 | 1399.7195 | 0.0010  | 0 | A.ASDISLLDAQSAPL.R       | ( <a href="#">Ions score 21</a> )               |
| 26 - 42 | 909.9846  | 1817.9547 | 1817.9523 | 0.0024  | 0 | A.ASDISLLDAQSAPLRVY.V    | ( <a href="#">Ions score 86</a> )               |
| 26 - 42 | 909.9853  | 1817.9560 | 1817.9523 | 0.0037  | 0 | A.ASDISLLDAQSAPLRVY.V    | ( <a href="#">Ions score 100</a> )              |
| 27 - 42 | 874.4653  | 1746.9160 | 1746.9152 | 0.0008  | 0 | A.SDISLLDAQSAPLRVY.V     | ( <a href="#">Ions score 60</a> )               |
| 27 - 42 | 874.4654  | 1746.9162 | 1746.9152 | 0.0011  | 0 | A.SDISLLDAQSAPLRVY.V     | ( <a href="#">Ions score 42</a> )               |
| 27 - 42 | 874.4656  | 1746.9166 | 1746.9152 | 0.0014  | 0 | A.SDISLLDAQSAPLRVY.V     | ( <a href="#">Ions score 69</a> )               |
| 27 - 42 | 874.4661  | 1746.9177 | 1746.9152 | 0.0025  | 0 | A.SDISLLDAQSAPLRVY.V     | ( <a href="#">Ions score 74</a> )               |
| 28 - 32 | 560.3292  | 559.3219  | 559.3217  | 0.0002  | 0 | S.DISLL.D                | ( <a href="#">Ions score 20</a> )               |
| 28 - 35 | 437.7290  | 873.4435  | 873.4444  | -0.0009 | 0 | S.DISLLDAQ.S             | ( <a href="#">Ions score 42</a> )               |
| 28 - 35 | 437.7294  | 873.4443  | 873.4444  | -0.0000 | 0 | S.DISLLDAQ.S             | ( <a href="#">Ions score 36</a> )               |
| 28 - 39 | 621.8327  | 1241.6509 | 1241.6503 | 0.0005  | 0 | S.DISLLDAQSAPL.R         | ( <a href="#">Ions score 39</a> )               |
| 28 - 39 | 621.8327  | 1241.6509 | 1241.6503 | 0.0005  | 0 | S.DISLLDAQSAPL.R         | ( <a href="#">Ions score 43</a> )               |
| 28 - 39 | 621.8330  | 1241.6515 | 1241.6503 | 0.0012  | 0 | S.DISLLDAQSAPL.R         | ( <a href="#">Ions score 27</a> )               |
| 28 - 42 | 830.9488  | 1659.8830 | 1659.8831 | -0.0001 | 0 | S.DISLLDAQSAPLRVY.V      | ( <a href="#">Ions score 30</a> )               |
| 28 - 42 | 830.9490  | 1659.8835 | 1659.8831 | 0.0004  | 0 | S.DISLLDAQSAPLRVY.V      | ( <a href="#">Ions score 26</a> )               |
| 28 - 42 | 830.9498  | 1659.8851 | 1659.8831 | 0.0020  | 0 | S.DISLLDAQSAPLRVY.V      | ( <a href="#">Ions score 51</a> )               |
| 28 - 42 | 830.9499  | 1659.8852 | 1659.8831 | 0.0021  | 0 | S.DISLLDAQSAPLRVY.V      | ( <a href="#">Ions score 26</a> )               |
| 28 - 42 | 830.9503  | 1659.8860 | 1659.8831 | 0.0028  | 0 | S.DISLLDAQSAPLRVY.V      | ( <a href="#">Ions score 53</a> )               |
| 28 - 42 | 830.9503  | 1659.8861 | 1659.8831 | 0.0029  | 0 | S.DISLLDAQSAPLRVY.V      | ( <a href="#">Ions score 99</a> )               |
| 33 - 42 | 560.2930  | 1118.5715 | 1118.5720 | -0.0005 | 0 | L.DAQSAPLRVY.V           | ( <a href="#">Ions score 46</a> )               |
| 33 - 42 | 560.2936  | 1118.5726 | 1118.5720 | 0.0006  | 0 | L.DAQSAPLRVY.V           | ( <a href="#">Ions score 49</a> )               |
| 33 - 42 | 560.2936  | 1118.5726 | 1118.5720 | 0.0006  | 0 | L.DAQSAPLRVY.V           | ( <a href="#">Ions score 20</a> )               |
| 33 - 42 | 560.2936  | 1118.5726 | 1118.5720 | 0.0006  | 0 | L.DAQSAPLRVY.V           | ( <a href="#">Ions score 49</a> )               |
| 33 - 42 | 560.2937  | 1118.5729 | 1118.5720 | 0.0009  | 0 | L.DAQSAPLRVY.V           | ( <a href="#">Ions score 46</a> )               |
| 33 - 42 | 560.2939  | 1118.5732 | 1118.5720 | 0.0012  | 0 | L.DAQSAPLRVY.V           | ( <a href="#">Ions score 46</a> )               |
| 33 - 42 | 560.2941  | 1118.5737 | 1118.5720 | 0.0017  | 0 | L.DAQSAPLRVY.V           | ( <a href="#">Ions score 37</a> )               |
| 33 - 42 | 1119.5812 | 1118.5739 | 1118.5720 | 0.0019  | 0 | L.DAQSAPLRVY.V           | ( <a href="#">Ions score 27</a> )               |
| 33 - 42 | 560.2943  | 1118.5739 | 1118.5720 | 0.0020  | 0 | L.DAQSAPLRVY.V           | ( <a href="#">Ions score 43</a> )               |
| 33 - 42 | 560.2945  | 1118.5744 | 1118.5720 | 0.0024  | 0 | L.DAQSAPLRVY.V           | ( <a href="#">Ions score 39</a> )               |
| 34 - 42 | 502.7796  | 1003.5447 | 1003.5450 | -0.0003 | 0 | D.AQSAPLRVY.V            | ( <a href="#">Ions score 45</a> )               |
| 34 - 42 | 502.7799  | 1003.5452 | 1003.5450 | 0.0002  | 0 | D.AQSAPLRVY.V            | ( <a href="#">Ions score 22</a> )               |
| 36 - 42 | 403.2317  | 804.4489  | 804.4494  | -0.0005 | 0 | Q.SAPLRVY.V              | ( <a href="#">Ions score 34</a> )               |
| 36 - 42 | 403.2320  | 804.4494  | 804.4494  | 0.0000  | 0 | Q.SAPLRVY.V              | ( <a href="#">Ions score 26</a> )               |
| 36 - 42 | 403.2320  | 804.4494  | 804.4494  | 0.0001  | 0 | Q.SAPLRVY.V              | ( <a href="#">Ions score 32</a> )               |
| 36 - 42 | 403.2320  | 804.4494  | 804.4494  | 0.0001  | 0 | Q.SAPLRVY.V              | ( <a href="#">Ions score 23</a> )               |
| 36 - 42 | 403.2320  | 804.4495  | 804.4494  | 0.0001  | 0 | Q.SAPLRVY.V              | ( <a href="#">Ions score 22</a> )               |
| 36 - 42 | 403.2320  | 804.4495  | 804.4494  | 0.0001  | 0 | Q.SAPLRVY.V              | ( <a href="#">Ions score 23</a> )               |
| 36 - 42 | 403.2321  | 804.4496  | 804.4494  | 0.0002  | 0 | Q.SAPLRVY.V              | ( <a href="#">Ions score 33</a> )               |
| 36 - 42 | 403.2321  | 804.4497  | 804.4494  | 0.0004  | 0 | Q.SAPLRVY.V              | ( <a href="#">Ions score 23</a> )               |
| 36 - 42 | 403.2321  | 804.4497  | 804.4494  | 0.0004  | 0 | Q.SAPLRVY.V              | ( <a href="#">Ions score 30</a> )               |
| 36 - 42 | 403.2322  | 804.4499  | 804.4494  | 0.0005  | 0 | Q.SAPLRVY.V              | ( <a href="#">Ions score 23</a> )               |
| 36 - 42 | 403.2322  | 804.4499  | 804.4494  | 0.0006  | 0 | Q.SAPLRVY.V              | ( <a href="#">Ions score 35</a> )               |
| 36 - 42 | 403.2323  | 804.4500  | 804.4494  | 0.0006  | 0 | Q.SAPLRVY.V              | ( <a href="#">Ions score 34</a> )               |
| 36 - 42 | 403.2324  | 804.4502  | 804.4494  | 0.0008  | 0 | Q.SAPLRVY.V              | ( <a href="#">Ions score 37</a> )               |
| 36 - 42 | 403.2325  | 804.4505  | 804.4494  | 0.0012  | 0 | Q.SAPLRVY.V              | ( <a href="#">Ions score 34</a> )               |
| 37 - 42 | 359.7155  | 717.4165  | 717.4173  | -0.0008 | 0 | S.APLRVY.V               | ( <a href="#">Ions score 33</a> )               |
| 37 - 42 | 359.7159  | 717.4171  | 717.4173  | -0.0002 | 0 | S.APLRVY.V               | ( <a href="#">Ions score 32</a> )               |
| 37 - 42 | 359.7159  | 717.4172  | 717.4173  | -0.0001 | 0 | S.APLRVY.V               | ( <a href="#">Ions score 36</a> )               |
| 38 - 42 | 324.1967  | 646.3788  | 646.3802  | -0.0015 | 0 | A.PLRVY.V                | ( <a href="#">Ions score 25</a> )               |
| 43 - 51 | 521.2767  | 1040.5388 | 1040.5390 | -0.0002 | 0 | Y.VEELKPTPE.G            | ( <a href="#">Ions score 50</a> )               |
| 43 - 51 | 521.2768  | 1040.5390 | 1040.5390 | 0.0001  | 0 | Y.VEELKPTPE.G            | ( <a href="#">Ions score 50</a> )               |
| 43 - 54 | 663.8435  | 1325.6725 | 1325.6714 | 0.0010  | 0 | Y.VEELKPTPEGL.E          | ( <a href="#">Ions score 29</a> )               |

|         |          |           |           |         |   |                       |                 |
|---------|----------|-----------|-----------|---------|---|-----------------------|-----------------|
| 43 - 57 | 841.4316 | 1680.8486 | 1680.8821 | -0.0335 | 0 | Y.VEELKPTPEGDLEIL.L   | (Ions score 31) |
| 43 - 57 | 841.4316 | 1680.8487 | 1680.8821 | -0.0334 | 0 | Y.VEELKPTPEGDLEIL.L   | (Ions score 30) |
| 43 - 57 | 841.4471 | 1680.8797 | 1680.8821 | -0.0024 | 0 | Y.VEELKPTPEGDLEIL.L   | (Ions score 30) |
| 43 - 57 | 841.4478 | 1680.8811 | 1680.8821 | -0.0010 | 0 | Y.VEELKPTPEGDLEIL.L   | (Ions score 39) |
| 43 - 57 | 841.4480 | 1680.8814 | 1680.8821 | -0.0007 | 0 | Y.VEELKPTPEGDLEIL.L   | (Ions score 26) |
| 43 - 57 | 841.4481 | 1680.8817 | 1680.8821 | -0.0004 | 0 | Y.VEELKPTPEGDLEIL.L   | (Ions score 43) |
| 43 - 57 | 841.4481 | 1680.8817 | 1680.8821 | -0.0004 | 0 | Y.VEELKPTPEGDLEIL.L   | (Ions score 20) |
| 43 - 57 | 841.4482 | 1680.8819 | 1680.8821 | -0.0002 | 0 | Y.VEELKPTPEGDLEIL.L   | (Ions score 25) |
| 43 - 57 | 841.4483 | 1680.8821 | 1680.8821 | -0.0001 | 0 | Y.VEELKPTPEGDLEIL.L   | (Ions score 39) |
| 43 - 57 | 841.4484 | 1680.8823 | 1680.8821 | 0.0002  | 0 | Y.VEELKPTPEGDLEIL.L   | (Ions score 31) |
| 43 - 57 | 841.4485 | 1680.8825 | 1680.8821 | 0.0004  | 0 | Y.VEELKPTPEGDLEIL.L   | (Ions score 30) |
| 43 - 57 | 841.4486 | 1680.8827 | 1680.8821 | 0.0005  | 0 | Y.VEELKPTPEGDLEIL.L   | (Ions score 20) |
| 43 - 57 | 841.4487 | 1680.8828 | 1680.8821 | 0.0007  | 0 | Y.VEELKPTPEGDLEIL.L   | (Ions score 45) |
| 43 - 57 | 841.4487 | 1680.8828 | 1680.8821 | 0.0007  | 0 | Y.VEELKPTPEGDLEIL.L   | (Ions score 27) |
| 43 - 57 | 841.4487 | 1680.8829 | 1680.8821 | 0.0008  | 0 | Y.VEELKPTPEGDLEIL.L   | (Ions score 34) |
| 43 - 57 | 841.4487 | 1680.8829 | 1680.8821 | 0.0008  | 0 | Y.VEELKPTPEGDLEIL.L   | (Ions score 32) |
| 43 - 57 | 841.4488 | 1680.8830 | 1680.8821 | 0.0009  | 0 | Y.VEELKPTPEGDLEIL.L   | (Ions score 57) |
| 43 - 57 | 841.4489 | 1680.8832 | 1680.8821 | 0.0010  | 0 | Y.VEELKPTPEGDLEIL.L   | (Ions score 24) |
| 43 - 57 | 841.4489 | 1680.8832 | 1680.8821 | 0.0010  | 0 | Y.VEELKPTPEGDLEIL.L   | (Ions score 36) |
| 43 - 57 | 841.4489 | 1680.8833 | 1680.8821 | 0.0012  | 0 | Y.VEELKPTPEGDLEIL.L   | (Ions score 42) |
| 43 - 57 | 841.4489 | 1680.8833 | 1680.8821 | 0.0012  | 0 | Y.VEELKPTPEGDLEIL.L   | (Ions score 43) |
| 43 - 57 | 841.4489 | 1680.8833 | 1680.8821 | 0.0012  | 0 | Y.VEELKPTPEGDLEIL.L   | (Ions score 32) |
| 43 - 57 | 841.4490 | 1680.8834 | 1680.8821 | 0.0013  | 0 | Y.VEELKPTPEGDLEIL.L   | (Ions score 56) |
| 43 - 57 | 841.4490 | 1680.8834 | 1680.8821 | 0.0013  | 0 | Y.VEELKPTPEGDLEIL.L   | (Ions score 48) |
| 43 - 57 | 841.4490 | 1680.8834 | 1680.8821 | 0.0013  | 0 | Y.VEELKPTPEGDLEIL.L   | (Ions score 33) |
| 43 - 57 | 841.4490 | 1680.8834 | 1680.8821 | 0.0013  | 0 | Y.VEELKPTPEGDLEIL.L   | (Ions score 43) |
| 43 - 57 | 841.4490 | 1680.8834 | 1680.8821 | 0.0013  | 0 | Y.VEELKPTPEGDLEIL.L   | (Ions score 35) |
| 43 - 57 | 841.4490 | 1680.8834 | 1680.8821 | 0.0013  | 0 | Y.VEELKPTPEGDLEIL.L   | (Ions score 22) |
| 43 - 57 | 841.4490 | 1680.8835 | 1680.8821 | 0.0014  | 0 | Y.VEELKPTPEGDLEIL.L   | (Ions score 55) |
| 43 - 57 | 841.4490 | 1680.8835 | 1680.8821 | 0.0014  | 0 | Y.VEELKPTPEGDLEIL.L   | (Ions score 27) |
| 43 - 57 | 841.4490 | 1680.8835 | 1680.8821 | 0.0014  | 0 | Y.VEELKPTPEGDLEIL.L   | (Ions score 26) |
| 43 - 57 | 841.4490 | 1680.8835 | 1680.8821 | 0.0014  | 0 | Y.VEELKPTPEGDLEIL.L   | (Ions score 30) |
| 43 - 57 | 841.4491 | 1680.8836 | 1680.8821 | 0.0015  | 0 | Y.VEELKPTPEGDLEIL.L   | (Ions score 64) |
| 43 - 57 | 841.4492 | 1680.8839 | 1680.8821 | 0.0018  | 0 | Y.VEELKPTPEGDLEIL.L   | (Ions score 59) |
| 43 - 57 | 841.4492 | 1680.8839 | 1680.8821 | 0.0018  | 0 | Y.VEELKPTPEGDLEIL.L   | (Ions score 39) |
| 43 - 57 | 841.4493 | 1680.8840 | 1680.8821 | 0.0019  | 0 | Y.VEELKPTPEGDLEIL.L   | (Ions score 51) |
| 43 - 57 | 841.4493 | 1680.8840 | 1680.8821 | 0.0019  | 0 | Y.VEELKPTPEGDLEIL.L   | (Ions score 57) |
| 43 - 57 | 841.4493 | 1680.8840 | 1680.8821 | 0.0019  | 0 | Y.VEELKPTPEGDLEIL.L   | (Ions score 28) |
| 43 - 57 | 841.4493 | 1680.8841 | 1680.8821 | 0.0020  | 0 | Y.VEELKPTPEGDLEIL.L   | (Ions score 21) |
| 43 - 57 | 841.4493 | 1680.8841 | 1680.8821 | 0.0020  | 0 | Y.VEELKPTPEGDLEIL.L   | (Ions score 26) |
| 43 - 57 | 841.4494 | 1680.8843 | 1680.8821 | 0.0021  | 0 | Y.VEELKPTPEGDLEIL.L   | (Ions score 51) |
| 43 - 57 | 841.4495 | 1680.8844 | 1680.8821 | 0.0022  | 0 | Y.VEELKPTPEGDLEIL.L   | (Ions score 66) |
| 43 - 57 | 841.4495 | 1680.8844 | 1680.8821 | 0.0022  | 0 | Y.VEELKPTPEGDLEIL.L   | (Ions score 41) |
| 43 - 57 | 841.4503 | 1680.8860 | 1680.8821 | 0.0038  | 0 | Y.VEELKPTPEGDLEIL.L   | (Ions score 38) |
| 43 - 57 | 841.4504 | 1680.8862 | 1680.8821 | 0.0041  | 0 | Y.VEELKPTPEGDLEIL.L   | (Ions score 64) |
| 43 - 57 | 841.4504 | 1680.8863 | 1680.8821 | 0.0042  | 0 | Y.VEELKPTPEGDLEIL.L   | (Ions score 48) |
| 43 - 57 | 841.4506 | 1680.8866 | 1680.8821 | 0.0044  | 0 | Y.VEELKPTPEGDLEIL.L   | (Ions score 52) |
| 43 - 57 | 841.4509 | 1680.8873 | 1680.8821 | 0.0052  | 0 | Y.VEELKPTPEGDLEIL.L   | (Ions score 46) |
| 43 - 57 | 841.4512 | 1680.8879 | 1680.8821 | 0.0058  | 0 | Y.VEELKPTPEGDLEIL.L   | (Ions score 49) |
| 43 - 57 | 841.4515 | 1680.8884 | 1680.8821 | 0.0063  | 0 | Y.VEELKPTPEGDLEIL.L   | (Ions score 67) |
| 43 - 57 | 841.4517 | 1680.8889 | 1680.8821 | 0.0068  | 0 | Y.VEELKPTPEGDLEIL.L   | (Ions score 55) |
| 43 - 59 | 962.0208 | 1922.0270 | 1922.0248 | 0.0022  | 0 | Y.VEELKPTPEGDLEILLQ.K | (Ions score 48) |
| 43 - 59 | 962.0209 | 1922.0272 | 1922.0248 | 0.0024  | 0 | Y.VEELKPTPEGDLEILLQ.K | (Ions score 37) |
| 43 - 59 | 962.0209 | 1922.0273 | 1922.0248 | 0.0026  | 0 | Y.VEELKPTPEGDLEILLQ.K | (Ions score 23) |
| 43 - 59 | 962.0211 | 1922.0277 | 1922.0248 | 0.0029  | 0 | Y.VEELKPTPEGDLEILLQ.K | (Ions score 59) |
| 43 - 59 | 962.0213 | 1922.0280 | 1922.0248 | 0.0033  | 0 | Y.VEELKPTPEGDLEILLQ.K | (Ions score 33) |
| 43 - 59 | 962.0214 | 1922.0282 | 1922.0248 | 0.0034  | 0 | Y.VEELKPTPEGDLEILLQ.K | (Ions score 60) |
| 43 - 59 | 962.0214 | 1922.0283 | 1922.0248 | 0.0035  | 0 | Y.VEELKPTPEGDLEILLQ.K | (Ions score 73) |
| 43 - 59 | 962.0224 | 1922.0302 | 1922.0248 | 0.0055  | 0 | Y.VEELKPTPEGDLEILLQ.K | (Ions score 57) |
| 45 - 57 | 727.3936 | 1452.7726 | 1452.7711 | 0.0014  | 0 | E.ELKPTPEGDLEIL.L     | (Ions score 65) |
| 45 - 57 | 727.3937 | 1452.7729 | 1452.7711 | 0.0018  | 0 | E.ELKPTPEGDLEIL.L     | (Ions score 21) |
| 45 - 57 | 727.3941 | 1452.7737 | 1452.7711 | 0.0025  | 0 | E.ELKPTPEGDLEIL.L     | (Ions score 59) |
| 45 - 57 | 727.3943 | 1452.7741 | 1452.7711 | 0.0030  | 0 | E.ELKPTPEGDLEIL.L     | (Ions score 33) |
| 45 - 57 | 727.3950 | 1452.7754 | 1452.7711 | 0.0042  | 0 | E.ELKPTPEGDLEIL.L     | (Ions score 51) |
| 46 - 57 | 662.8721 | 1323.7296 | 1323.7285 | 0.0010  | 0 | E.LKPTPEGDLEIL.L      | (Ions score 40) |
| 46 - 57 | 662.8721 | 1323.7296 | 1323.7285 | 0.0010  | 0 | E.LKPTPEGDLEIL.L      | (Ions score 39) |
| 46 - 57 | 662.8721 | 1323.7297 | 1323.7285 | 0.0012  | 0 | E.LKPTPEGDLEIL.L      | (Ions score 39) |
| 46 - 59 | 783.4432 | 1564.8718 | 1564.8712 | 0.0006  | 0 | E.LKPTPEGDLEILLQ.K    | (Ions score 34) |
| 46 - 59 | 783.4434 | 1564.8723 | 1564.8712 | 0.0011  | 0 | E.LKPTPEGDLEILLQ.K    | (Ions score 44) |
| 46 - 59 | 783.4437 | 1564.8728 | 1564.8712 | 0.0016  | 0 | E.LKPTPEGDLEILLQ.K    | (Ions score 63) |
| 46 - 59 | 783.4457 | 1564.8769 | 1564.8712 | 0.0057  | 0 | E.LKPTPEGDLEILLQ.K    | (Ions score 57) |
| 52 - 57 | 659.3608 | 658.3536  | 658.3537  | -0.0002 | 0 | E.GDLEIL.L            | (Ions score 27) |
| 58 - 73 | 639.3404 | 1914.9994 | 1914.9985 | 0.0008  | 0 | L.LQKWENGECAQKKIIA.E  | (Ions score 33) |
| 60 - 73 | 558.9590 | 1673.8551 | 1673.8559 | -0.0007 | 0 | Q.KWENGECAQKKIIA.E    | (Ions score 22) |
| 62 - 73 | 454.2345 | 1359.6816 | 1359.6816 | -0.0000 | 0 | W.ENGECAQKKIIA.E      | (Ions score 21) |
| 70 - 82 | 486.6409 | 1456.9010 | 1456.9017 | -0.0007 | 0 | K.KIIAEKTKIPAVF.K     | (Ions score 38) |
| 70 - 82 | 486.6411 | 1456.9014 | 1456.9017 | -0.0003 | 0 | K.KIIAEKTKIPAVF.K     | (Ions score 24) |
| 70 - 82 | 486.6411 | 1456.9016 | 1456.9017 | -0.0001 | 0 | K.KIIAEKTKIPAVF.K     | (Ions score 27) |
| 70 - 82 | 486.6416 | 1456.9030 | 1456.9017 | 0.0013  | 0 | K.KIIAEKTKIPAVF.K     | (Ions score 28) |
| 71 - 82 | 665.4109 | 1328.8073 | 1328.8067 | 0.0006  | 0 | K.IIAEKTKIPAVF.K      | (Ions score 38) |
| 73 - 82 | 552.3264 | 1102.6383 | 1102.6386 | -0.0003 | 0 | I.AEKTIPAVF.K         | (Ions score 33) |
| 74 - 82 | 516.8077 | 1031.6009 | 1031.6015 | -0.0006 | 0 | A.EKTKIPAVF.K         | (Ions score 41) |
| 74 - 82 | 516.8078 | 1031.6010 | 1031.6015 | -0.0004 | 0 | A.EKTKIPAVF.K         | (Ions score 25) |
| 74 - 82 | 516.8080 | 1031.6014 | 1031.6015 | -0.0001 | 0 | A.EKTKIPAVF.K         | (Ions score 35) |
| 74 - 82 | 516.8081 | 1031.6017 | 1031.6015 | 0.0002  | 0 | A.EKTKIPAVF.K         | (Ions score 44) |
| 74 - 82 | 516.8082 | 1031.6019 | 1031.6015 | 0.0004  | 0 | A.EKTKIPAVF.K         | (Ions score 43) |
| 74 - 82 | 516.8083 | 1031.6020 | 1031.6015 | 0.0005  | 0 | A.EKTKIPAVF.K         | (Ions score 50) |
| 74 - 82 | 516.8083 | 1031.6020 | 1031.6015 | 0.0005  | 0 | A.EKTKIPAVF.K         | (Ions score 36) |
| 74 - 82 | 516.8083 | 1031.6020 | 1031.6015 | 0.0005  | 0 | A.EKTKIPAVF.K         | (Ions score 22) |
| 74 - 82 | 516.8084 | 1031.6023 | 1031.6015 | 0.0008  | 0 | A.EKTKIPAVF.K         | (Ions score 50) |
| 74 - 82 | 516.8085 | 1031.6024 | 1031.6015 | 0.0009  | 0 | A.EKTKIPAVF.K         | (Ions score 45) |
| 74 - 82 | 516.8085 | 1031.6025 | 1031.6015 | 0.0010  | 0 | A.EKTKIPAVF.K         | (Ions score 43) |
| 74 - 83 | 387.5727 | 1159.6963 | 1159.6964 | -0.0001 | 0 | A.EKTKIPAVFK.I        | (Ions score 23) |

|          |          |           |           |         |   |                   |                 |
|----------|----------|-----------|-----------|---------|---|-------------------|-----------------|
| 75 - 82  | 452.2862 | 902.5578  | 902.5589  | -0.0011 | 0 | E.KTKIPAVF.K      | (Ions score 29) |
| 75 - 82  | 452.2866 | 902.5586  | 902.5589  | -0.0003 | 0 | E.KTKIPAVF.K      | (Ions score 34) |
| 75 - 82  | 452.2866 | 902.5587  | 902.5589  | -0.0002 | 0 | E.KTKIPAVF.K      | (Ions score 31) |
| 76 - 83  | 301.8600 | 902.5582  | 902.5589  | -0.0007 | 0 | K.TKIPAVFK.I      | (Ions score 28) |
| 76 - 83  | 301.8600 | 902.5582  | 902.5589  | -0.0007 | 0 | K.TKIPAVFK.I      | (Ions score 29) |
| 76 - 83  | 301.8602 | 902.5589  | 902.5589  | -0.0000 | 0 | K.TKIPAVFK.I      | (Ions score 38) |
| 77 - 82  | 337.7151 | 673.4157  | 673.4163  | -0.0005 | 0 | T.KIPAVF.K        | (Ions score 32) |
| 77 - 82  | 337.7153 | 673.4161  | 673.4163  | -0.0001 | 0 | T.KIPAVF.K        | (Ions score 23) |
| 81 - 85  | 311.1838 | 620.3531  | 620.3533  | -0.0002 | 0 | A.VFKID.A         | (Ions score 33) |
| 81 - 85  | 311.1839 | 620.3533  | 620.3533  | -0.0000 | 0 | A.VFKID.A         | (Ions score 33) |
| 83 - 87  | 559.3448 | 558.3376  | 558.3377  | -0.0001 | 0 | F.KIDAL.N         | (Ions score 29) |
| 83 - 93  | 419.5782 | 1255.7127 | 1255.7135 | -0.0008 | 0 | F.KIDALNENKVL.V   | (Ions score 33) |
| 83 - 93  | 419.5783 | 1255.7130 | 1255.7135 | -0.0005 | 0 | F.KIDALNENKVL.V   | (Ions score 36) |
| 83 - 93  | 628.8639 | 1255.7132 | 1255.7135 | -0.0003 | 0 | F.KIDALNENKVL.V   | (Ions score 48) |
| 83 - 93  | 628.8641 | 1255.7137 | 1255.7135 | 0.0002  | 0 | F.KIDALNENKVL.V   | (Ions score 37) |
| 83 - 93  | 419.5786 | 1255.7138 | 1255.7135 | 0.0003  | 0 | F.KIDALNENKVL.V   | (Ions score 27) |
| 83 - 93  | 628.8643 | 1255.7141 | 1255.7135 | 0.0005  | 0 | F.KIDALNENKVL.V   | (Ions score 51) |
| 83 - 93  | 628.8644 | 1255.7143 | 1255.7135 | 0.0008  | 0 | F.KIDALNENKVL.V   | (Ions score 41) |
| 83 - 95  | 490.2960 | 1467.8662 | 1467.8660 | 0.0002  | 0 | F.KIDALNENKVLVL.D | (Ions score 30) |
| 83 - 95  | 490.2962 | 1467.8668 | 1467.8660 | 0.0008  | 0 | F.KIDALNENKVLVL.D | (Ions score 34) |
| 83 - 95  | 734.9411 | 1467.8677 | 1467.8660 | 0.0016  | 0 | F.KIDALNENKVLVL.D | (Ions score 77) |
| 86 - 93  | 450.7610 | 899.5074  | 899.5076  | -0.0002 | 0 | D.ALNENKVL.V      | (Ions score 35) |
| 86 - 93  | 450.7611 | 899.5077  | 899.5076  | 0.0001  | 0 | D.ALNENKVL.V      | (Ions score 37) |
| 86 - 93  | 450.7613 | 899.5080  | 899.5076  | 0.0004  | 0 | D.ALNENKVL.V      | (Ions score 40) |
| 86 - 93  | 450.7614 | 899.5082  | 899.5076  | 0.0006  | 0 | D.ALNENKVL.V      | (Ions score 41) |
| 86 - 93  | 450.7614 | 899.5082  | 899.5076  | 0.0006  | 0 | D.ALNENKVL.V      | (Ions score 39) |
| 86 - 93  | 450.7614 | 899.5083  | 899.5076  | 0.0008  | 0 | D.ALNENKVL.V      | (Ions score 35) |
| 86 - 93  | 450.7617 | 899.5088  | 899.5076  | 0.0012  | 0 | D.ALNENKVL.V      | (Ions score 54) |
| 86 - 95  | 556.8375 | 1111.6604 | 1111.6600 | 0.0003  | 0 | D.ALNENKVLVL.D    | (Ions score 32) |
| 86 - 95  | 556.8375 | 1111.6605 | 1111.6600 | 0.0004  | 0 | D.ALNENKVLVL.D    | (Ions score 30) |
| 88 - 93  | 358.7002 | 715.3858  | 715.3864  | -0.0006 | 0 | L.NENKVL.V        | (Ions score 21) |
| 88 - 93  | 358.7003 | 715.3860  | 715.3864  | -0.0005 | 0 | L.NENKVL.V        | (Ions score 23) |
| 88 - 93  | 358.7003 | 715.3860  | 715.3864  | -0.0004 | 0 | L.NENKVL.V        | (Ions score 24) |
| 88 - 93  | 358.7003 | 715.3860  | 715.3864  | -0.0004 | 0 | L.NENKVL.V        | (Ions score 20) |
| 88 - 93  | 358.7004 | 715.3863  | 715.3864  | -0.0001 | 0 | L.NENKVL.V        | (Ions score 21) |
| 88 - 93  | 358.7007 | 715.3869  | 715.3864  | 0.0005  | 0 | L.NENKVL.V        | (Ions score 22) |
| 88 - 95  | 464.7766 | 927.5387  | 927.5389  | -0.0002 | 0 | L.NENKVLVL.D      | (Ions score 31) |
| 88 - 95  | 464.7769 | 927.5393  | 927.5389  | 0.0004  | 0 | L.NENKVLVL.D      | (Ions score 32) |
| 88 - 95  | 464.7771 | 927.5396  | 927.5389  | 0.0007  | 0 | L.NENKVLVL.D      | (Ions score 42) |
| 88 - 95  | 464.7772 | 927.5398  | 927.5389  | 0.0010  | 0 | L.NENKVLVL.D      | (Ions score 41) |
| 88 - 95  | 464.7772 | 927.5399  | 927.5389  | 0.0010  | 0 | L.NENKVLVL.D      | (Ions score 36) |
| 94 - 102 | 382.2006 | 1143.5800 | 1143.5812 | -0.0011 | 0 | L.VLTDYKKY.L      | (Ions score 25) |
| 94 - 102 | 572.7976 | 1143.5807 | 1143.5812 | -0.0005 | 0 | L.VLTDYKKY.L      | (Ions score 54) |
| 94 - 102 | 382.2009 | 1143.5810 | 1143.5812 | -0.0002 | 0 | L.VLTDYKKY.L      | (Ions score 36) |
| 94 - 102 | 382.2010 | 1143.5812 | 1143.5812 | 0.0001  | 0 | L.VLTDYKKY.L      | (Ions score 28) |
| 94 - 102 | 572.7981 | 1143.5816 | 1143.5812 | 0.0005  | 0 | L.VLTDYKKY.L      | (Ions score 21) |
| 94 - 102 | 572.7982 | 1143.5818 | 1143.5812 | 0.0006  | 0 | L.VLTDYKKY.L      | (Ions score 55) |
| 94 - 102 | 382.2014 | 1143.5824 | 1143.5812 | 0.0013  | 0 | L.VLTDYKKY.L      | (Ions score 34) |
| 94 - 103 | 629.3398 | 1256.6651 | 1256.6652 | -0.0001 | 0 | L.VLTDYKKY.L      | (Ions score 32) |
| 94 - 103 | 629.3400 | 1256.6655 | 1256.6652 | 0.0003  | 0 | L.VLTDYKKY.L      | (Ions score 42) |
| 94 - 103 | 629.3401 | 1256.6656 | 1256.6652 | 0.0004  | 0 | L.VLTDYKKY.L      | (Ions score 54) |
| 94 - 103 | 419.8960 | 1256.6663 | 1256.6652 | 0.0010  | 0 | L.VLTDYKKY.L      | (Ions score 22) |
| 94 - 103 | 629.3406 | 1256.6666 | 1256.6652 | 0.0014  | 0 | L.VLTDYKKY.L      | (Ions score 53) |
| 94 - 103 | 419.8962 | 1256.6669 | 1256.6652 | 0.0017  | 0 | L.VLTDYKKY.L      | (Ions score 23) |
| 94 - 103 | 629.3408 | 1256.6671 | 1256.6652 | 0.0019  | 0 | L.VLTDYKKY.L      | (Ions score 35) |
| 94 - 103 | 419.8965 | 1256.6675 | 1256.6652 | 0.0023  | 0 | L.VLTDYKKY.L      | (Ions score 28) |
| 94 - 103 | 419.8965 | 1256.6676 | 1256.6652 | 0.0024  | 0 | L.VLTDYKKY.L      | (Ions score 25) |
| 94 - 103 | 419.8969 | 1256.6687 | 1256.6652 | 0.0035  | 0 | L.VLTDYKKY.L      | (Ions score 29) |
| 94 - 104 | 457.5900 | 1369.7481 | 1369.7493 | -0.0012 | 0 | L.VLTDYKKY.L      | (Ions score 22) |
| 94 - 104 | 457.5902 | 1369.7487 | 1369.7493 | -0.0006 | 0 | L.VLTDYKKY.L      | (Ions score 24) |
| 94 - 104 | 457.5902 | 1369.7488 | 1369.7493 | -0.0005 | 0 | L.VLTDYKKY.L      | (Ions score 21) |
| 94 - 104 | 457.5904 | 1369.7494 | 1369.7493 | 0.0002  | 0 | L.VLTDYKKY.L      | (Ions score 25) |
| 94 - 104 | 457.5905 | 1369.7495 | 1369.7493 | 0.0003  | 0 | L.VLTDYKKY.L      | (Ions score 32) |
| 94 - 104 | 457.5906 | 1369.7499 | 1369.7493 | 0.0006  | 0 | L.VLTDYKKY.L      | (Ions score 32) |
| 94 - 104 | 685.8823 | 1369.7500 | 1369.7493 | 0.0007  | 0 | L.VLTDYKKY.L      | (Ions score 32) |
| 94 - 104 | 685.8824 | 1369.7502 | 1369.7493 | 0.0009  | 0 | L.VLTDYKKY.L      | (Ions score 45) |
| 94 - 104 | 457.5907 | 1369.7503 | 1369.7493 | 0.0010  | 0 | L.VLTDYKKY.L      | (Ions score 20) |
| 94 - 104 | 685.8826 | 1369.7507 | 1369.7493 | 0.0014  | 0 | L.VLTDYKKY.L      | (Ions score 43) |
| 94 - 105 | 506.6129 | 1516.8169 | 1516.8177 | -0.0008 | 0 | L.VLTDYKKY.L      | (Ions score 20) |
| 94 - 105 | 506.6130 | 1516.8172 | 1516.8177 | -0.0005 | 0 | L.VLTDYKKY.L      | (Ions score 23) |
| 94 - 105 | 506.6130 | 1516.8173 | 1516.8177 | -0.0004 | 0 | L.VLTDYKKY.L      | (Ions score 24) |
| 94 - 105 | 506.6131 | 1516.8176 | 1516.8177 | -0.0001 | 0 | L.VLTDYKKY.L      | (Ions score 23) |
| 94 - 105 | 506.6131 | 1516.8176 | 1516.8177 | -0.0001 | 0 | L.VLTDYKKY.L      | (Ions score 24) |
| 94 - 105 | 759.4165 | 1516.8185 | 1516.8177 | 0.0008  | 0 | L.VLTDYKKY.L      | (Ions score 41) |
| 94 - 105 | 506.6134 | 1516.8185 | 1516.8177 | 0.0008  | 0 | L.VLTDYKKY.L      | (Ions score 25) |
| 94 - 105 | 759.4166 | 1516.8186 | 1516.8177 | 0.0009  | 0 | L.VLTDYKKY.L      | (Ions score 22) |
| 94 - 105 | 759.4167 | 1516.8188 | 1516.8177 | 0.0011  | 0 | L.VLTDYKKY.L      | (Ions score 40) |
| 94 - 105 | 759.4167 | 1516.8188 | 1516.8177 | 0.0011  | 0 | L.VLTDYKKY.L      | (Ions score 31) |
| 94 - 105 | 506.6137 | 1516.8193 | 1516.8177 | 0.0016  | 0 | L.VLTDYKKY.L      | (Ions score 24) |
| 94 - 105 | 759.4169 | 1516.8193 | 1516.8177 | 0.0016  | 0 | L.VLTDYKKY.L      | (Ions score 40) |
| 94 - 105 | 759.4169 | 1516.8193 | 1516.8177 | 0.0016  | 0 | L.VLTDYKKY.L      | (Ions score 31) |
| 94 - 105 | 506.6137 | 1516.8194 | 1516.8177 | 0.0017  | 0 | L.VLTDYKKY.L      | (Ions score 20) |
| 94 - 105 | 759.4173 | 1516.8200 | 1516.8177 | 0.0024  | 0 | L.VLTDYKKY.L      | (Ions score 32) |
| 94 - 105 | 759.4174 | 1516.8203 | 1516.8177 | 0.0026  | 0 | L.VLTDYKKY.L      | (Ions score 34) |
| 94 - 105 | 506.6142 | 1516.8208 | 1516.8177 | 0.0031  | 0 | L.VLTDYKKY.L      | (Ions score 22) |
| 94 - 106 | 559.9572 | 1676.8496 | 1676.8483 | 0.0013  | 0 | L.VLTDYKKY.L      | (Ions score 30) |
| 94 - 106 | 559.9572 | 1676.8496 | 1676.8483 | 0.0013  | 0 | L.VLTDYKKY.L      | (Ions score 27) |
| 94 - 106 | 839.4338 | 1676.8530 | 1676.8483 | 0.0047  | 0 | L.VLTDYKKY.L      | (Ions score 24) |
| 94 - 106 | 839.4357 | 1676.8569 | 1676.8483 | 0.0086  | 0 | L.VLTDYKKY.L      | (Ions score 34) |
| 96 - 102 | 466.7215 | 931.4285  | 931.4287  | -0.0002 | 0 | L.DTDYKKY.L       | (Ions score 31) |
| 96 - 103 | 349.1779 | 1044.5117 | 1044.5128 | -0.0010 | 0 | L.DTDYKKY.L       | (Ions score 25) |
| 96 - 103 | 523.2633 | 1044.5121 | 1044.5128 | -0.0007 | 0 | L.DTDYKKY.L       | (Ions score 22) |
| 96 - 103 | 523.2634 | 1044.5122 | 1044.5128 | -0.0006 | 0 | L.DTDYKKY.L       | (Ions score 21) |

|           |           |           |           |         |   |                         |                 |
|-----------|-----------|-----------|-----------|---------|---|-------------------------|-----------------|
| 96 - 103  | 523.2636  | 1044.5125 | 1044.5128 | -0.0002 | 0 | L.DTDYKKYL.L            | (Ions score 21) |
| 96 - 103  | 523.2638  | 1044.5130 | 1044.5128 | 0.0003  | 0 | L.DTDYKKYL.L            | (Ions score 21) |
| 96 - 103  | 523.2639  | 1044.5133 | 1044.5128 | 0.0005  | 0 | L.DTDYKKYL.L            | (Ions score 27) |
| 96 - 103  | 523.2639  | 1044.5133 | 1044.5128 | 0.0005  | 0 | L.DTDYKKYL.L            | (Ions score 24) |
| 96 - 103  | 523.2640  | 1044.5135 | 1044.5128 | 0.0008  | 0 | L.DTDYKKYL.L            | (Ions score 25) |
| 96 - 103  | 1045.5209 | 1044.5136 | 1044.5128 | 0.0008  | 0 | L.DTDYKKYL.L            | (Ions score 39) |
| 96 - 103  | 523.2642  | 1044.5138 | 1044.5128 | 0.0010  | 0 | L.DTDYKKYL.L            | (Ions score 28) |
| 96 - 103  | 523.2643  | 1044.5141 | 1044.5128 | 0.0014  | 0 | L.DTDYKKYL.L            | (Ions score 28) |
| 96 - 104  | 579.8058  | 1157.5971 | 1157.5968 | 0.0003  | 0 | L.DTDYKKYLL.F           | (Ions score 40) |
| 96 - 104  | 579.8060  | 1157.5974 | 1157.5968 | 0.0006  | 0 | L.DTDYKKYLL.F           | (Ions score 36) |
| 96 - 104  | 579.8064  | 1157.5982 | 1157.5968 | 0.0014  | 0 | L.DTDYKKYLL.F           | (Ions score 39) |
| 96 - 105  | 653.3173  | 1304.6200 | 1304.6652 | -0.0453 | 0 | L.DTDYKKYLLF.C          | (Ions score 25) |
| 96 - 105  | 653.3370  | 1304.6594 | 1304.6652 | -0.0058 | 0 | L.DTDYKKYLLF.C          | (Ions score 24) |
| 96 - 105  | 653.3403  | 1304.6660 | 1304.6652 | 0.0008  | 0 | L.DTDYKKYLLF.C          | (Ions score 34) |
| 96 - 105  | 653.3403  | 1304.6660 | 1304.6652 | 0.0008  | 0 | L.DTDYKKYLLF.C          | (Ions score 28) |
| 96 - 105  | 653.3403  | 1304.6661 | 1304.6652 | 0.0009  | 0 | L.DTDYKKYLLF.C          | (Ions score 29) |
| 96 - 105  | 653.3408  | 1304.6670 | 1304.6652 | 0.0017  | 0 | L.DTDYKKYLLF.C          | (Ions score 23) |
| 96 - 105  | 653.3410  | 1304.6675 | 1304.6652 | 0.0022  | 0 | L.DTDYKKYLLF.C          | (Ions score 21) |
| 96 - 105  | 653.3413  | 1304.6681 | 1304.6652 | 0.0028  | 0 | L.DTDYKKYLLF.C          | (Ions score 36) |
| 96 - 105  | 653.3414  | 1304.6682 | 1304.6652 | 0.0030  | 0 | L.DTDYKKYLLF.C          | (Ions score 36) |
| 96 - 105  | 653.3441  | 1304.6737 | 1304.6652 | 0.0085  | 0 | L.DTDYKKYLLF.C          | (Ions score 25) |
| 96 - 106  | 733.3554  | 1464.6963 | 1464.6959 | 0.0004  | 0 | L.DTDYKKYLLFC.M         | (Ions score 42) |
| 96 - 106  | 733.3557  | 1464.6968 | 1464.6959 | 0.0009  | 0 | L.DTDYKKYLLFC.M         | (Ions score 37) |
| 96 - 106  | 733.3557  | 1464.6969 | 1464.6959 | 0.0010  | 0 | L.DTDYKKYLLFC.M         | (Ions score 38) |
| 99 - 105  | 487.7894  | 973.5642  | 973.5636  | 0.0006  | 0 | D.YKKYLLF.C             | (Ions score 41) |
| 99 - 105  | 487.7894  | 973.5642  | 973.5636  | 0.0006  | 0 | D.YKKYLLF.C             | (Ions score 29) |
| 99 - 105  | 487.7894  | 973.5643  | 973.5636  | 0.0007  | 0 | D.YKKYLLF.C             | (Ions score 28) |
| 105 - 118 | 806.8350  | 1611.6554 | 1611.6545 | 0.0009  | 0 | L.FCMENSAEPEQSLA.C      | (Ions score 42) |
| 105 - 118 | 806.8350  | 1611.6555 | 1611.6545 | 0.0010  | 0 | L.FCMENSAEPEQSLA.C      | (Ions score 45) |
| 105 - 118 | 806.8353  | 1611.6561 | 1611.6545 | 0.0016  | 0 | L.FCMENSAEPEQSLA.C      | (Ions score 28) |
| 105 - 118 | 806.8356  | 1611.6567 | 1611.6545 | 0.0022  | 0 | L.FCMENSAEPEQSLA.C      | (Ions score 23) |
| 106 - 118 | 733.3010  | 1464.5874 | 1464.5861 | 0.0013  | 0 | F.CMENSAEPEQSLA.C       | (Ions score 46) |
| 106 - 118 | 733.3011  | 1464.5876 | 1464.5861 | 0.0016  | 0 | F.CMENSAEPEQSLA.C       | (Ions score 36) |
| 106 - 118 | 733.3018  | 1464.5890 | 1464.5861 | 0.0029  | 0 | F.CMENSAEPEQSLA.C       | (Ions score 54) |
| 106 - 118 | 733.3019  | 1464.5893 | 1464.5861 | 0.0033  | 0 | F.CMENSAEPEQSLA.C       | (Ions score 63) |
| 106 - 120 | 877.3458  | 1752.6771 | 1752.6753 | 0.0018  | 0 | F.CMENSAEPEQSLACQ.C     | (Ions score 40) |
| 107 - 118 | 653.2844  | 1304.5542 | 1304.5554 | -0.0012 | 0 | C.MENSAEPEQSLA.C        | (Ions score 28) |
| 107 - 118 | 653.2847  | 1304.5548 | 1304.5554 | -0.0006 | 0 | C.MENSAEPEQSLA.C        | (Ions score 28) |
| 108 - 118 | 587.7646  | 1173.5147 | 1173.5149 | -0.0002 | 0 | M.ENSAEPEQSLA.C         | (Ions score 47) |
| 108 - 118 | 587.7651  | 1173.5157 | 1173.5149 | 0.0008  | 0 | M.ENSAEPEQSLA.C         | (Ions score 51) |
| 108 - 118 | 587.7653  | 1173.5160 | 1173.5149 | 0.0010  | 0 | M.ENSAEPEQSLA.C         | (Ions score 39) |
| 108 - 118 | 587.7653  | 1173.5160 | 1173.5149 | 0.0010  | 0 | M.ENSAEPEQSLA.C         | (Ions score 52) |
| 108 - 118 | 587.7656  | 1173.5166 | 1173.5149 | 0.0017  | 0 | M.ENSAEPEQSLA.C         | (Ions score 43) |
| 111 - 118 | 422.7058  | 843.3969  | 843.3974  | -0.0004 | 0 | S.AEPEQSLA.C            | (Ions score 38) |
| 111 - 118 | 422.7058  | 843.3971  | 843.3974  | -0.0003 | 0 | S.AEPEQSLA.C            | (Ions score 42) |
| 119 - 123 | 679.2902  | 678.2829  | 678.2829  | 0.0000  | 0 | A.CQCLV.R               | (Ions score 25) |
| 119 - 136 | 1105.0151 | 2208.0157 | 2208.0191 | -0.0033 | 0 | A.CQCLVRTPEVDDEALEKF.D  | (Ions score 64) |
| 119 - 136 | 737.0134  | 2208.0183 | 2208.0191 | -0.0008 | 0 | A.CQCLVRTPEVDDEALEKF.D  | (Ions score 48) |
| 119 - 136 | 1105.0167 | 2208.0189 | 2208.0191 | -0.0002 | 0 | A.CQCLVRTPEVDDEALEKF.D  | (Ions score 66) |
| 119 - 136 | 737.0139  | 2208.0197 | 2208.0191 | 0.0007  | 0 | A.CQCLVRTPEVDDEALEKF.D  | (Ions score 59) |
| 119 - 136 | 737.0141  | 2208.0205 | 2208.0191 | 0.0014  | 0 | A.CQCLVRTPEVDDEALEKF.D  | (Ions score 29) |
| 119 - 136 | 737.0142  | 2208.0208 | 2208.0191 | 0.0018  | 0 | A.CQCLVRTPEVDDEALEKF.D  | (Ions score 52) |
| 119 - 136 | 737.0143  | 2208.0210 | 2208.0191 | 0.0020  | 0 | A.CQCLVRTPEVDDEALEKF.D  | (Ions score 45) |
| 119 - 136 | 737.0143  | 2208.0212 | 2208.0191 | 0.0021  | 0 | A.CQCLVRTPEVDDEALEKF.D  | (Ions score 47) |
| 119 - 136 | 737.0144  | 2208.0214 | 2208.0191 | 0.0023  | 0 | A.CQCLVRTPEVDDEALEKF.D  | (Ions score 29) |
| 119 - 136 | 737.0147  | 2208.0223 | 2208.0191 | 0.0032  | 0 | A.CQCLVRTPEVDDEALEKF.D  | (Ions score 51) |
| 119 - 136 | 737.0162  | 2208.0269 | 2208.0191 | 0.0078  | 0 | A.CQCLVRTPEVDDEALEKF.D  | (Ions score 60) |
| 120 - 136 | 683.6693  | 2047.9861 | 2047.9884 | -0.0023 | 0 | C.QCLVRTPEVDDEALEKF.D   | (Ions score 45) |
| 120 - 136 | 683.6707  | 2047.9901 | 2047.9884 | 0.0017  | 0 | C.QCLVRTPEVDDEALEKF.D   | (Ions score 22) |
| 120 - 136 | 1025.0035 | 2047.9925 | 2047.9884 | 0.0041  | 0 | C.QCLVRTPEVDDEALEKF.D   | (Ions score 45) |
| 121 - 136 | 960.9714  | 1919.9282 | 1919.9298 | -0.0016 | 0 | Q.CLVRTPEVDDEALEKF.D    | (Ions score 66) |
| 121 - 136 | 640.9840  | 1919.9302 | 1919.9298 | 0.0004  | 0 | Q.CLVRTPEVDDEALEKF.D    | (Ions score 70) |
| 121 - 136 | 640.9844  | 1919.9315 | 1919.9298 | 0.0017  | 0 | Q.CLVRTPEVDDEALEKF.D    | (Ions score 67) |
| 121 - 136 | 640.9846  | 1919.9318 | 1919.9298 | 0.0020  | 0 | Q.CLVRTPEVDDEALEKF.D    | (Ions score 41) |
| 121 - 136 | 640.9847  | 1919.9324 | 1919.9298 | 0.0026  | 0 | Q.CLVRTPEVDDEALEKF.D    | (Ions score 58) |
| 121 - 136 | 960.9737  | 1919.9328 | 1919.9298 | 0.0030  | 0 | Q.CLVRTPEVDDEALEKF.D    | (Ions score 62) |
| 121 - 136 | 640.9850  | 1919.9331 | 1919.9298 | 0.0033  | 0 | Q.CLVRTPEVDDEALEKF.D    | (Ions score 37) |
| 121 - 136 | 640.9852  | 1919.9337 | 1919.9298 | 0.0039  | 0 | Q.CLVRTPEVDDEALEKF.D    | (Ions score 52) |
| 121 - 136 | 640.9857  | 1919.9353 | 1919.9298 | 0.0055  | 0 | Q.CLVRTPEVDDEALEKF.D    | (Ions score 66) |
| 122 - 133 | 678.8545  | 1355.6944 | 1355.6932 | 0.0012  | 0 | C.LVRTPEVDDEAL.E        | (Ions score 61) |
| 122 - 136 | 587.6404  | 1759.8995 | 1759.8992 | 0.0003  | 0 | C.LVRTPEVDDEALEKF.D     | (Ions score 48) |
| 122 - 136 | 587.6406  | 1759.9000 | 1759.8992 | 0.0009  | 0 | C.LVRTPEVDDEALEKF.D     | (Ions score 50) |
| 122 - 136 | 880.9578  | 1759.9011 | 1759.8992 | 0.0019  | 0 | C.LVRTPEVDDEALEKF.D     | (Ions score 74) |
| 122 - 136 | 880.9583  | 1759.9020 | 1759.8992 | 0.0028  | 0 | C.LVRTPEVDDEALEKF.D     | (Ions score 70) |
| 122 - 136 | 587.6413  | 1759.9021 | 1759.8992 | 0.0029  | 0 | C.LVRTPEVDDEALEKF.D     | (Ions score 57) |
| 122 - 136 | 880.9584  | 1759.9023 | 1759.8992 | 0.0031  | 0 | C.LVRTPEVDDEALEKF.D     | (Ions score 68) |
| 122 - 136 | 587.6417  | 1759.9032 | 1759.8992 | 0.0040  | 0 | C.LVRTPEVDDEALEKF.D     | (Ions score 57) |
| 122 - 141 | 772.7538  | 2315.2395 | 2315.2372 | 0.0023  | 0 | C.LVRTPEVDDEALEKFKALK.A | (Ions score 25) |
| 123 - 136 | 549.9456  | 1646.8148 | 1646.8151 | -0.0003 | 0 | L.VRTPEVDDEALEKF.D      | (Ions score 34) |
| 123 - 136 | 824.4152  | 1646.8159 | 1646.8151 | 0.0008  | 0 | L.VRTPEVDDEALEKF.D      | (Ions score 92) |
| 123 - 136 | 549.9464  | 1646.8172 | 1646.8151 | 0.0021  | 0 | L.VRTPEVDDEALEKF.D      | (Ions score 59) |
| 123 - 136 | 549.9464  | 1646.8174 | 1646.8151 | 0.0023  | 0 | L.VRTPEVDDEALEKF.D      | (Ions score 49) |
| 123 - 136 | 824.4160  | 1646.8175 | 1646.8151 | 0.0024  | 0 | L.VRTPEVDDEALEKF.D      | (Ions score 62) |
| 124 - 136 | 516.9225  | 1547.7456 | 1547.7467 | -0.0011 | 0 | V.RTPEVDDEALEKF.D       | (Ions score 46) |
| 124 - 136 | 516.9228  | 1547.7465 | 1547.7467 | -0.0002 | 0 | V.RTPEVDDEALEKF.D       | (Ions score 52) |
| 124 - 136 | 774.8810  | 1547.7475 | 1547.7467 | 0.0008  | 0 | V.RTPEVDDEALEKF.D       | (Ions score 65) |
| 124 - 136 | 774.8812  | 1547.7478 | 1547.7467 | 0.0011  | 0 | V.RTPEVDDEALEKF.D       | (Ions score 51) |
| 125 - 136 | 696.8303  | 1391.6460 | 1391.6456 | 0.0004  | 0 | R.TPEVDDEALEKF.D        | (Ions score 61) |
| 125 - 136 | 696.8303  | 1391.6461 | 1391.6456 | 0.0005  | 0 | R.TPEVDDEALEKF.D        | (Ions score 81) |
| 125 - 136 | 696.8306  | 1391.6467 | 1391.6456 | 0.0011  | 0 | R.TPEVDDEALEKF.D        | (Ions score 81) |
| 125 - 136 | 696.8308  | 1391.6471 | 1391.6456 | 0.0015  | 0 | R.TPEVDDEALEKF.D        | (Ions score 81) |
| 134 - 140 | 425.7372  | 849.4599  | 849.4596  | 0.0004  | 0 | L.EKFDKAL.K             | (Ions score 26) |
| 137 - 145 | 493.7881  | 985.5617  | 985.5630  | -0.0013 | 0 | F.DKALKALP.M.H          | (Ions score 39) |

|           |          |           |           |         |   |                       |                               |
|-----------|----------|-----------|-----------|---------|---|-----------------------|-------------------------------|
| 137 - 145 | 493.7888 | 985.5631  | 985.5630  | 0.0001  | 0 | F.DKALKALPM.H         | (Ions score 45)               |
| 137 - 145 | 493.7889 | 985.5633  | 985.5630  | 0.0003  | 0 | F.DKALKALPM.H         | (Ions score 45)               |
| 137 - 145 | 493.7889 | 985.5633  | 985.5630  | 0.0003  | 0 | F.DKALKALPM.H         | (Ions score 20)               |
| 137 - 145 | 493.7889 | 985.5633  | 985.5630  | 0.0003  | 0 | F.DKALKALPM.H         | (Ions score 41)               |
| 137 - 145 | 493.7889 | 985.5633  | 985.5630  | 0.0003  | 0 | F.DKALKALPM.H         | (Ions score 44)               |
| 137 - 145 | 493.7889 | 985.5633  | 985.5630  | 0.0003  | 0 | F.DKALKALPM.H         | (Ions score 42)               |
| 137 - 145 | 501.7860 | 1001.5573 | 1001.5579 | -0.0006 | 0 | F.DKALKALPM.H         | Oxidation (M) (Ions score 48) |
| 137 - 145 | 501.7860 | 1001.5574 | 1001.5579 | -0.0005 | 0 | F.DKALKALPM.H         | Oxidation (M) (Ions score 34) |
| 137 - 148 | 464.9430 | 1391.8072 | 1391.8071 | 0.0002  | 0 | F.DKALKALPMHIR.L      | (Ions score 25)               |
| 137 - 148 | 464.9432 | 1391.8078 | 1391.8071 | 0.0007  | 0 | F.DKALKALPMHIR.L      | (Ions score 29)               |
| 139 - 145 | 372.2278 | 742.4411  | 742.4411  | 0.0000  | 0 | K.ALKALPM.H           | (Ions score 33)               |
| 139 - 145 | 372.2279 | 742.4413  | 742.4411  | 0.0002  | 0 | K.ALKALPM.H           | (Ions score 22)               |
| 141 - 148 | 322.5281 | 964.5624  | 964.5640  | -0.0016 | 0 | L.KALPMHIR.L          | (Ions score 22)               |
| 141 - 148 | 322.5282 | 964.5627  | 964.5640  | -0.0013 | 0 | L.KALPMHIR.L          | (Ions score 37)               |
| 141 - 148 | 322.5284 | 964.5634  | 964.5640  | -0.0006 | 0 | L.KALPMHIR.L          | (Ions score 22)               |
| 141 - 148 | 322.5285 | 964.5637  | 964.5640  | -0.0003 | 0 | L.KALPMHIR.L          | (Ions score 31)               |
| 141 - 148 | 483.2892 | 964.5639  | 964.5640  | -0.0001 | 0 | L.KALPMHIR.L          | (Ions score 28)               |
| 141 - 148 | 322.5288 | 964.5645  | 964.5640  | 0.0005  | 0 | L.KALPMHIR.L          | (Ions score 31)               |
| 142 - 148 | 419.2421 | 836.4696  | 836.4691  | 0.0005  | 0 | K.ALPMHIR.L           | (Ions score 31)               |
| 146 - 150 | 313.1921 | 624.3696  | 624.3707  | -0.0011 | 0 | M.HIRLS.F             | (Ions score 23)               |
| 146 - 162 | 708.0221 | 2121.0445 | 2121.0425 | 0.0019  | 0 | M.HIRLSFNPTQLEEQCHI.- | (Ions score 54)               |
| 149 - 154 | 678.3461 | 677.3389  | 677.3384  | 0.0004  | 0 | R.LSFNPT.Q            | (Ions score 29)               |
| 149 - 162 | 858.4049 | 1714.7953 | 1714.7984 | -0.0032 | 0 | R.LSFNPTQLEEQCHI.-    | (Ions score 41)               |
| 149 - 162 | 858.4056 | 1714.7967 | 1714.7984 | -0.0017 | 0 | R.LSFNPTQLEEQCHI.-    | (Ions score 92)               |
| 149 - 162 | 858.4056 | 1714.7967 | 1714.7984 | -0.0017 | 0 | R.LSFNPTQLEEQCHI.-    | (Ions score 29)               |
| 149 - 162 | 858.4063 | 1714.7981 | 1714.7984 | -0.0004 | 0 | R.LSFNPTQLEEQCHI.-    | (Ions score 45)               |
| 149 - 162 | 858.4071 | 1714.7997 | 1714.7984 | 0.0012  | 0 | R.LSFNPTQLEEQCHI.-    | (Ions score 46)               |
| 149 - 162 | 858.4078 | 1714.8010 | 1714.7984 | 0.0026  | 0 | R.LSFNPTQLEEQCHI.-    | (Ions score 80)               |
| 149 - 162 | 858.4079 | 1714.8012 | 1714.7984 | 0.0028  | 0 | R.LSFNPTQLEEQCHI.-    | (Ions score 81)               |
| 149 - 162 | 858.4080 | 1714.8014 | 1714.7984 | 0.0029  | 0 | R.LSFNPTQLEEQCHI.-    | (Ions score 52)               |
| 149 - 162 | 858.4086 | 1714.8027 | 1714.7984 | 0.0043  | 0 | R.LSFNPTQLEEQCHI.-    | (Ions score 79)               |
| 149 - 162 | 858.4088 | 1714.8030 | 1714.7984 | 0.0045  | 0 | R.LSFNPTQLEEQCHI.-    | (Ions score 81)               |
| 149 - 162 | 858.4090 | 1714.8034 | 1714.7984 | 0.0050  | 0 | R.LSFNPTQLEEQCHI.-    | (Ions score 88)               |
| 150 - 162 | 801.8647 | 1601.7149 | 1601.7144 | 0.0006  | 0 | L.SFNPTQLEEQCHI.-     | (Ions score 66)               |
| 151 - 159 | 553.2614 | 1104.5083 | 1104.5087 | -0.0005 | 0 | S.FNPTQLEEQ.C         | (Ions score 35)               |
| 151 - 159 | 553.2616 | 1104.5086 | 1104.5087 | -0.0001 | 0 | S.FNPTQLEEQ.C         | (Ions score 42)               |
| 151 - 162 | 758.3489 | 1514.6833 | 1514.6824 | 0.0010  | 0 | S.FNPTQLEEQCHI.-      | (Ions score 57)               |
| 151 - 162 | 758.3490 | 1514.6834 | 1514.6824 | 0.0011  | 0 | S.FNPTQLEEQCHI.-      | (Ions score 59)               |
| 151 - 162 | 758.3496 | 1514.6847 | 1514.6824 | 0.0023  | 0 | S.FNPTQLEEQCHI.-      | (Ions score 57)               |
| 151 - 162 | 758.3499 | 1514.6853 | 1514.6824 | 0.0029  | 0 | S.FNPTQLEEQCHI.-      | (Ions score 60)               |
| 152 - 162 | 684.8141 | 1367.6136 | 1367.6140 | -0.0003 | 0 | F.NPTQLEEQCHI.-       | (Ions score 40)               |
| 152 - 162 | 684.8149 | 1367.6153 | 1367.6140 | 0.0014  | 0 | F.NPTQLEEQCHI.-       | (Ions score 35)               |
| 153 - 162 | 627.7930 | 1253.5715 | 1253.5710 | 0.0005  | 0 | N.PTQLEEQCHI.-        | (Ions score 47)               |
| 153 - 162 | 627.7933 | 1253.5720 | 1253.5710 | 0.0010  | 0 | N.PTQLEEQCHI.-        | (Ions score 47)               |
| 153 - 162 | 627.7934 | 1253.5722 | 1253.5710 | 0.0012  | 0 | N.PTQLEEQCHI.-        | (Ions score 50)               |
| 155 - 162 | 528.7423 | 1055.4701 | 1055.4706 | -0.0005 | 0 | T.QLEEQCHI.-          | (Ions score 33)               |
| 155 - 162 | 528.7426 | 1055.4707 | 1055.4706 | 0.0001  | 0 | T.QLEEQCHI.-          | (Ions score 34)               |
| 155 - 162 | 528.7426 | 1055.4707 | 1055.4706 | 0.0001  | 0 | T.QLEEQCHI.-          | (Ions score 21)               |
| 155 - 162 | 528.7427 | 1055.4709 | 1055.4706 | 0.0003  | 0 | T.QLEEQCHI.-          | (Ions score 30)               |
| 155 - 162 | 528.7427 | 1055.4709 | 1055.4706 | 0.0003  | 0 | T.QLEEQCHI.-          | (Ions score 28)               |
| 155 - 162 | 528.7432 | 1055.4718 | 1055.4706 | 0.0012  | 0 | T.QLEEQCHI.-          | (Ions score 29)               |
| 155 - 162 | 528.7433 | 1055.4720 | 1055.4706 | 0.0014  | 0 | T.QLEEQCHI.-          | (Ions score 29)               |

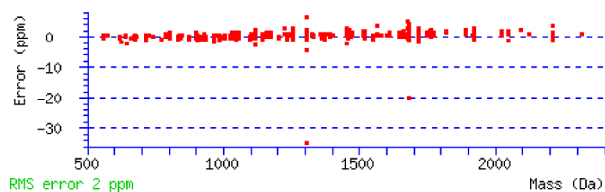

Mascot: <http://www.matrixscience.com/>
