# Supplementary material for: An alternative for proteinase K-heat-sensitive protease from fungus Onygena corvina for biotechnology: cloning, engineering, expression, characterization and special application for protein sequencing
Source: PubMed Central journal article supplement (PMC7313183; doi:10.1186/s12934-020-01392-3), 2020-06-24
Supplement: 12934_2020_1392_MOESM17_ESM.pdf [file 12934_2020_1392_MOESM17_ESM.pdf]

# **MASCOT** SCIENCE Mascot Search Results

## Protein View

Match to: **mAb\_HC** Score: **4625**

Found in search of \\SERVER3\User\Kunden\_Projekte\Koller\_8375\Further-characterization-part-I\8375\_mAb\_HL1\_1070n1.mgf

Nominal mass (M<sub>r</sub>): **49839**; Calculated pI value: **8.67**

NCBI BLAST search of [mAb\\_HC](#) against nr  
Unformatted [sequence string](#) for pasting into other applications

Fixed modifications: Carbamidomethyl (C)  
Variable modifications: Oxidation (M)  
No enzyme cleavage specificity  
Sequence Coverage: **84%**

Matched peptides shown in **Bold Red**

```

1 QVQLQQPAAE LVPKPGASVKM SCKASGYFTF SYNMHWVKQT PGRGLEWIGA
51 IYPGNGDTSY NQKFKGKATL TADKSSSTAY MQLSSLTSED SAVVYCARST
101 YGGDWFYFNV WGAGTTVTVS AASTKGPSVF PLAPSSKSTS GGTAALGCLV
151 KDYFPEPVTY SWNSGALTSG VHTFPAVLSQ SGLYSLSSV TVPSSSLGTQ
201 TYICNVNHPK SNTKVDKQVE PKSCDKHTHC PPCPAPELLG GPSVFLFPPK
251 PKDTLMISRT PEVTCVVVDV SHEDPEVKFN WYVDGVEVHN AKTKPREEQY
301 NSYTRVSVL TVLHQDWLNG KEYKCKVSNK ALPAPIEKTI SKAKGQPREP
351 QVYTLPPSRD ELTKNQVSLT CLVKGFYPSD IAVEWESNGQ PENNYKTTTP
401 VLDSGDSFLL YSKLTVDKSR WQGNVVFSCS VMHEALHNYH TQKSLSLSPG
451 K
    
```

Sort Peptides By  Residue Number  Increasing Mass  Decreasing Mass

| Start - End | Observed  | Mr (expt) | Mr (calc) | Delta   | Miss | Sequence                                                         |
|-------------|-----------|-----------|-----------|---------|------|------------------------------------------------------------------|
| 5 - 15      | 562.3089  | 1122.6032 | 1122.6033 | -0.0000 | 0    | L.QQPGAELVKPG.A ( <a href="#">Ions score 43</a> )                |
| 5 - 19      | 503.6189  | 1507.8348 | 1507.8358 | -0.0010 | 0    | L.QQPGAELVKPGASVK.M ( <a href="#">Ions score 25</a> )            |
| 6 - 15      | 498.2774  | 994.5403  | 994.5447  | -0.0044 | 0    | Q.QPGAELVKPG.A ( <a href="#">Ions score 40</a> )                 |
| 6 - 19      | 460.9336  | 1379.7790 | 1379.7772 | 0.0018  | 0    | Q.QPGAELVKPGASVK.M ( <a href="#">Ions score 23</a> )             |
| 22 - 30     | 517.7344  | 1033.4543 | 1033.4539 | 0.0005  | 0    | S.CKASGYFTF.S ( <a href="#">Ions score 22</a> )                  |
| 31 - 38     | 532.7529  | 1063.4912 | 1063.4909 | 0.0003  | 0    | T.SYNMHWVK.Q ( <a href="#">Ions score 31</a> )                   |
| 31 - 38     | 532.7531  | 1063.4917 | 1063.4909 | 0.0008  | 0    | T.SYNMHWVK.Q ( <a href="#">Ions score 40</a> )                   |
| 33 - 38     | 407.7101  | 813.4056  | 813.3956  | 0.0100  | 0    | Y.NMHWVK.Q ( <a href="#">Ions score 27</a> )                     |
| 39 - 49     | 607.3203  | 1212.6260 | 1212.6251 | 0.0009  | 0    | K.QTPGRGLEWIG.A ( <a href="#">Ions score 30</a> )                |
| 39 - 50     | 642.8381  | 1283.6616 | 1283.6622 | -0.0006 | 0    | K.QTPGRGLEWIG.A.I ( <a href="#">Ions score 25</a> )              |
| 39 - 50     | 642.8386  | 1283.6627 | 1283.6622 | 0.0005  | 0    | K.QTPGRGLEWIG.A.I ( <a href="#">Ions score 27</a> )              |
| 39 - 50     | 642.8391  | 1283.6635 | 1283.6622 | 0.0014  | 0    | K.QTPGRGLEWIG.A.I ( <a href="#">Ions score 26</a> )              |
| 39 - 54     | 857.9503  | 1713.8861 | 1713.8838 | 0.0023  | 0    | K.QTPGRGLEWIGAIYPG.N ( <a href="#">Ions score 28</a> )           |
| 39 - 55     | 914.9715  | 1827.9284 | 1827.9267 | 0.0017  | 0    | K.QTPGRGLEWIGAIYPGN.G ( <a href="#">Ions score 52</a> )          |
| 39 - 55     | 914.9720  | 1827.9294 | 1827.9267 | 0.0027  | 0    | K.QTPGRGLEWIGAIYPGN.G ( <a href="#">Ions score 29</a> )          |
| 39 - 62     | 865.4149  | 2593.2227 | 2593.2197 | 0.0031  | 0    | K.QTPGRGLEWIGAIYPGNGDTSYNQ.K ( <a href="#">Ions score 51</a> )   |
| 39 - 62     | 865.4149  | 2593.2229 | 2593.2197 | 0.0033  | 0    | K.QTPGRGLEWIGAIYPGNGDTSYNQ.K ( <a href="#">Ions score 59</a> )   |
| 39 - 62     | 1297.6193 | 2593.2240 | 2593.2197 | 0.0043  | 0    | K.QTPGRGLEWIGAIYPGNGDTSYNQ.K ( <a href="#">Ions score 47</a> )   |
| 39 - 62     | 1297.6194 | 2593.2242 | 2593.2197 | 0.0046  | 0    | K.QTPGRGLEWIGAIYPGNGDTSYNQ.K ( <a href="#">Ions score 53</a> )   |
| 46 - 50     | 575.2818  | 574.2745  | 574.2751  | -0.0006 | 0    | L.EWIGA.I ( <a href="#">Ions score 25</a> )                      |
| 46 - 50     | 575.2823  | 574.2751  | 574.2751  | -0.0000 | 0    | L.EWIGA.I ( <a href="#">Ions score 20</a> )                      |
| 63 - 67     | 304.1998  | 606.3850  | 606.3853  | -0.0003 | 0    | Q.KFKGK.A ( <a href="#">Ions score 22</a> )                      |
| 63 - 80     | 635.3424  | 1903.0054 | 1903.0050 | 0.0004  | 0    | Q.KFKGKATLTADKSSSTAY.M ( <a href="#">Ions score 47</a> )         |
| 68 - 73     | 591.3138  | 590.3065  | 590.2912  | 0.0154  | 0    | K.ATLTAD.K ( <a href="#">Ions score 20</a> )                     |
| 68 - 80     | 658.3226  | 1314.6307 | 1314.6303 | 0.0004  | 0    | K.ATLTADKSSSTAY.M ( <a href="#">Ions score 74</a> )              |
| 72 - 78     | 348.1635  | 694.3125  | 694.3133  | -0.0008 | 0    | T.ADKSSST.A ( <a href="#">Ions score 25</a> )                    |
| 72 - 80     | 465.2138  | 928.4130  | 928.4138  | -0.0008 | 0    | T.ADKSSSTAY.M ( <a href="#">Ions score 48</a> )                  |
| 85 - 95     | 617.7777  | 1233.5409 | 1233.5401 | 0.0008  | 0    | S.SLTSEDSAVVY.C ( <a href="#">Ions score 44</a> )                |
| 85 - 95     | 617.7778  | 1233.5411 | 1233.5401 | 0.0010  | 0    | S.SLTSEDSAVVY.C ( <a href="#">Ions score 55</a> )                |
| 95 - 102    | 542.2307  | 1082.4469 | 1082.4491 | -0.0022 | 0    | Y.YCARSTYY.G ( <a href="#">Ions score 30</a> )                   |
| 99 - 109    | 686.7780  | 1371.5415 | 1371.5407 | 0.0007  | 0    | R.STYYGGDWFYFN.V ( <a href="#">Ions score 66</a> )               |
| 99 - 109    | 686.7780  | 1371.5415 | 1371.5407 | 0.0007  | 0    | R.STYYGGDWFYFN.V ( <a href="#">Ions score 59</a> )               |
| 99 - 109    | 1372.5493 | 1371.5420 | 1371.5407 | 0.0013  | 0    | R.STYYGGDWFYFN.V ( <a href="#">Ions score 29</a> )               |
| 101 - 109   | 592.7376  | 1183.4607 | 1183.4610 | -0.0004 | 0    | T.YYGGDWFYFN.V ( <a href="#">Ions score 31</a> )                 |
| 121 - 132   | 587.8264  | 1173.6383 | 1173.6393 | -0.0010 | 0    | S.AASTKGPSVFPL.A ( <a href="#">Ions score 33</a> )               |
| 121 - 132   | 587.8265  | 1173.6385 | 1173.6393 | -0.0008 | 0    | S.AASTKGPSVFPL.A ( <a href="#">Ions score 42</a> )               |
| 121 - 132   | 587.8268  | 1173.6390 | 1173.6393 | -0.0003 | 0    | S.AASTKGPSVFPL.A ( <a href="#">Ions score 50</a> )               |
| 121 - 132   | 587.8269  | 1173.6393 | 1173.6393 | -0.0001 | 0    | S.AASTKGPSVFPL.A ( <a href="#">Ions score 41</a> )               |
| 121 - 132   | 587.8270  | 1173.6394 | 1173.6393 | 0.0001  | 0    | S.AASTKGPSVFPL.A ( <a href="#">Ions score 49</a> )               |
| 121 - 132   | 587.8273  | 1173.6401 | 1173.6393 | 0.0008  | 0    | S.AASTKGPSVFPL.A ( <a href="#">Ions score 44</a> )               |
| 121 - 132   | 587.8275  | 1173.6404 | 1173.6393 | 0.0010  | 0    | S.AASTKGPSVFPL.A ( <a href="#">Ions score 52</a> )               |
| 121 - 132   | 587.8278  | 1173.6410 | 1173.6393 | 0.0016  | 0    | S.AASTKGPSVFPL.A ( <a href="#">Ions score 53</a> )               |
| 121 - 135   | 715.3865  | 1428.7584 | 1428.7612 | -0.0028 | 0    | S.AASTKGPSVFPLAPS.S ( <a href="#">Ions score 37</a> )            |
| 121 - 135   | 715.3891  | 1428.7636 | 1428.7612 | 0.0024  | 0    | S.AASTKGPSVFPLAPS.S ( <a href="#">Ions score 41</a> )            |
| 121 - 137   | 548.9688  | 1643.8846 | 1643.8882 | -0.0036 | 0    | S.AASTKGPSVFPLAPSSK.S ( <a href="#">Ions score 38</a> )          |
| 121 - 146   | 797.4141  | 2389.2204 | 2389.2488 | -0.0285 | 0    | S.AASTKGPSVFPLAPSSKSTSGGTAAL.G ( <a href="#">Ions score 46</a> ) |
| 121 - 146   | 797.4184  | 2389.2334 | 2389.2488 | -0.0155 | 0    | S.AASTKGPSVFPLAPSSKSTSGGTAAL.G ( <a href="#">Ions score 50</a> ) |
| 121 - 146   | 797.4256  | 2389.2550 | 2389.2488 | 0.0061  | 0    | S.AASTKGPSVFPLAPSSKSTSGGTAAL.G ( <a href="#">Ions score 45</a> ) |
| 121 - 146   | 1195.6366 | 2389.2586 | 2389.2488 | 0.0098  | 0    | S.AASTKGPSVFPLAPSSKSTSGGTAAL.G ( <a href="#">Ions score 50</a> ) |
| 123 - 132   | 516.7892  | 1031.5638 | 1031.5651 | -0.0013 | 0    | A.STKGPSVFPL.A ( <a href="#">Ions score 28</a> )                 |
| 123 - 132   | 516.7892  | 1031.5639 | 1031.5651 | -0.0012 | 0    | A.STKGPSVFPL.A ( <a href="#">Ions score 28</a> )                 |
| 123 - 132   | 516.7892  | 1031.5639 | 1031.5651 | -0.0012 | 0    | A.STKGPSVFPL.A ( <a href="#">Ions score 28</a> )                 |
| 123 - 132   | 516.7899  | 1031.5652 | 1031.5651 | 0.0001  | 0    | A.STKGPSVFPL.A ( <a href="#">Ions score 27</a> )                 |
| 123 - 132   | 516.7899  | 1031.5652 | 1031.5651 | 0.0001  | 0    | A.STKGPSVFPL.A ( <a href="#">Ions score 33</a> )                 |
| 123 - 132   | 516.7902  | 1031.5658 | 1031.5651 | 0.0007  | 0    | A.STKGPSVFPL.A ( <a href="#">Ions score 36</a> )                 |
| 123 - 132   | 516.7903  | 1031.5660 | 1031.5651 | 0.0009  | 0    | A.STKGPSVFPL.A ( <a href="#">Ions score 27</a> )                 |

|           |           |           |           |         |   |                             |                 |
|-----------|-----------|-----------|-----------|---------|---|-----------------------------|-----------------|
| 123 - 135 | 644.3497  | 1286.6849 | 1286.6870 | -0.0021 | 0 | A.STKGPSVFLAPS.S            | (Ions score 47) |
| 123 - 135 | 644.3505  | 1286.6864 | 1286.6870 | -0.0006 | 0 | A.STKGPSVFLAPS.S            | (Ions score 49) |
| 123 - 135 | 644.3505  | 1286.6865 | 1286.6870 | -0.0005 | 0 | A.STKGPSVFLAPS.S            | (Ions score 42) |
| 123 - 135 | 644.3510  | 1286.6874 | 1286.6870 | 0.0003  | 0 | A.STKGPSVFLAPS.S            | (Ions score 40) |
| 123 - 135 | 644.3517  | 1286.6888 | 1286.6870 | 0.0018  | 0 | A.STKGPSVFLAPS.S            | (Ions score 44) |
| 123 - 137 | 501.6111  | 1501.8113 | 1501.8140 | -0.0027 | 0 | A.STKGPSVFLAPSSK.S          | (Ions score 29) |
| 123 - 137 | 751.9130  | 1501.8114 | 1501.8140 | -0.0026 | 0 | A.STKGPSVFLAPSSK.S          | (Ions score 78) |
| 123 - 146 | 750.0565  | 2247.1477 | 2247.1746 | -0.0269 | 0 | A.STKGPSVFLAPSSKSTSGGTAAL.G | (Ions score 60) |
| 123 - 146 | 750.0670  | 2247.1790 | 2247.1746 | 0.0044  | 0 | A.STKGPSVFLAPSSKSTSGGTAAL.G | (Ions score 45) |
| 123 - 146 | 1124.5977 | 2247.1808 | 2247.1746 | 0.0062  | 0 | A.STKGPSVFLAPSSKSTSGGTAAL.G | (Ions score 56) |
| 123 - 146 | 750.0679  | 2247.1820 | 2247.1746 | 0.0074  | 0 | A.STKGPSVFLAPSSKSTSGGTAAL.G | (Ions score 44) |
| 124 - 132 | 473.2735  | 944.5324  | 944.5331  | -0.0006 | 0 | S.TKGPSVFLA                 | (Ions score 27) |
| 133 - 146 | 617.8128  | 1233.6111 | 1233.6201 | -0.0090 | 0 | L.APSSKSTSGGTAAL.G          | (Ions score 76) |
| 133 - 146 | 617.8245  | 1233.6344 | 1233.6201 | 0.0143  | 0 | L.APSSKSTSGGTAAL.G          | (Ions score 73) |
| 133 - 146 | 617.8245  | 1233.6344 | 1233.6201 | 0.0143  | 0 | L.APSSKSTSGGTAAL.G          | (Ions score 77) |
| 133 - 146 | 617.8254  | 1233.6363 | 1233.6201 | 0.0163  | 0 | L.APSSKSTSGGTAAL.G          | (Ions score 60) |
| 136 - 146 | 490.2564  | 978.4982  | 978.4982  | 0.0001  | 0 | S.SKSTSGGTAAL.G             | (Ions score 28) |
| 147 - 158 | 712.3506  | 1422.6866 | 1422.6853 | 0.0013  | 0 | L.GCLVKDYFPEPV.T            | (Ions score 54) |
| 147 - 158 | 712.3513  | 1422.6881 | 1422.6853 | 0.0028  | 0 | L.GCLVKDYFPEPV.T            | (Ions score 60) |
| 147 - 160 | 812.4092  | 1622.8038 | 1622.8014 | 0.0024  | 0 | L.GCLVKDYFPEPVTV.S          | (Ions score 42) |
| 147 - 160 | 812.4092  | 1622.8039 | 1622.8014 | 0.0026  | 0 | L.GCLVKDYFPEPVTV.S          | (Ions score 49) |
| 147 - 161 | 855.9241  | 1709.8337 | 1709.8334 | 0.0003  | 0 | L.GCLVKDYFPEPVTVS.W         | (Ions score 60) |
| 147 - 161 | 855.9246  | 1709.8346 | 1709.8334 | 0.0012  | 0 | L.GCLVKDYFPEPVTVS.W         | (Ions score 49) |
| 147 - 161 | 855.9247  | 1709.8349 | 1709.8334 | 0.0015  | 0 | L.GCLVKDYFPEPVTVS.W         | (Ions score 56) |
| 147 - 161 | 855.9249  | 1709.8352 | 1709.8334 | 0.0018  | 0 | L.GCLVKDYFPEPVTVS.W         | (Ions score 49) |
| 147 - 161 | 855.9250  | 1709.8354 | 1709.8334 | 0.0020  | 0 | L.GCLVKDYFPEPVTVS.W         | (Ions score 20) |
| 147 - 161 | 855.9250  | 1709.8355 | 1709.8334 | 0.0021  | 0 | L.GCLVKDYFPEPVTVS.W         | (Ions score 47) |
| 147 - 161 | 855.9250  | 1709.8355 | 1709.8334 | 0.0021  | 0 | L.GCLVKDYFPEPVTVS.W         | (Ions score 45) |
| 147 - 161 | 855.9252  | 1709.8359 | 1709.8334 | 0.0025  | 0 | L.GCLVKDYFPEPVTVS.W         | (Ions score 28) |
| 147 - 161 | 855.9254  | 1709.8363 | 1709.8334 | 0.0029  | 0 | L.GCLVKDYFPEPVTVS.W         | (Ions score 39) |
| 147 - 161 | 855.9255  | 1709.8364 | 1709.8334 | 0.0030  | 0 | L.GCLVKDYFPEPVTVS.W         | (Ions score 25) |
| 147 - 161 | 855.9260  | 1709.8375 | 1709.8334 | 0.0041  | 0 | L.GCLVKDYFPEPVTVS.W         | (Ions score 38) |
| 147 - 161 | 855.9262  | 1709.8379 | 1709.8334 | 0.0045  | 0 | L.GCLVKDYFPEPVTVS.W         | (Ions score 27) |
| 147 - 161 | 855.9268  | 1709.8390 | 1709.8334 | 0.0056  | 0 | L.GCLVKDYFPEPVTVS.W         | (Ions score 44) |
| 147 - 162 | 948.9644  | 1895.9142 | 1895.9127 | 0.0014  | 0 | L.GCLVKDYFPEPVTWSW.N        | (Ions score 48) |
| 147 - 162 | 948.9652  | 1895.9159 | 1895.9127 | 0.0031  | 0 | L.GCLVKDYFPEPVTWSW.N        | (Ions score 29) |
| 149 - 161 | 747.3968  | 1492.7790 | 1492.7813 | -0.0023 | 0 | C.LVKDYFPEPVTVS.W           | (Ions score 50) |
| 149 - 161 | 747.3986  | 1492.7826 | 1492.7813 | 0.0013  | 0 | C.LVKDYFPEPVTVS.W           | (Ions score 35) |
| 149 - 161 | 747.3991  | 1492.7837 | 1492.7813 | 0.0024  | 0 | C.LVKDYFPEPVTVS.W           | (Ions score 68) |
| 150 - 161 | 690.8553  | 1379.6961 | 1379.6972 | -0.0011 | 0 | L.VKDYFPEPVTVS.W            | (Ions score 49) |
| 150 - 161 | 690.8554  | 1379.6963 | 1379.6972 | -0.0010 | 0 | L.VKDYFPEPVTVS.W            | (Ions score 52) |
| 150 - 161 | 690.8558  | 1379.6970 | 1379.6972 | -0.0002 | 0 | L.VKDYFPEPVTVS.W            | (Ions score 31) |
| 152 - 161 | 577.2741  | 1152.5337 | 1152.5339 | -0.0002 | 0 | K.DYFPEPVTVS.W              | (Ions score 50) |
| 152 - 161 | 577.2742  | 1152.5339 | 1152.5339 | 0.0000  | 0 | K.DYFPEPVTVS.W              | (Ions score 53) |
| 152 - 161 | 577.2744  | 1152.5342 | 1152.5339 | 0.0003  | 0 | K.DYFPEPVTVS.W              | (Ions score 63) |
| 152 - 161 | 577.2744  | 1152.5342 | 1152.5339 | 0.0003  | 0 | K.DYFPEPVTVS.W              | (Ions score 53) |
| 152 - 161 | 577.2745  | 1152.5344 | 1152.5339 | 0.0005  | 0 | K.DYFPEPVTVS.W              | (Ions score 59) |
| 152 - 161 | 577.2746  | 1152.5346 | 1152.5339 | 0.0008  | 0 | K.DYFPEPVTVS.W              | (Ions score 53) |
| 152 - 161 | 577.2747  | 1152.5348 | 1152.5339 | 0.0009  | 0 | K.DYFPEPVTVS.W              | (Ions score 50) |
| 152 - 161 | 577.2747  | 1152.5349 | 1152.5339 | 0.0010  | 0 | K.DYFPEPVTVS.W              | (Ions score 53) |
| 152 - 161 | 577.2747  | 1152.5349 | 1152.5339 | 0.0010  | 0 | K.DYFPEPVTVS.W              | (Ions score 45) |
| 162 - 172 | 564.7763  | 1127.5381 | 1127.5359 | 0.0021  | 0 | S.WNSGALTSGVH.T             | (Ions score 70) |
| 162 - 172 | 564.7765  | 1127.5384 | 1127.5359 | 0.0025  | 0 | S.WNSGALTSGVH.T             | (Ions score 73) |
| 162 - 172 | 564.7769  | 1127.5392 | 1127.5359 | 0.0032  | 0 | S.WNSGALTSGVH.T             | (Ions score 64) |
| 162 - 178 | 878.9551  | 1755.8957 | 1755.8944 | 0.0014  | 0 | S.WNSGALTSGVHTFPAVL.Q       | (Ions score 68) |
| 162 - 178 | 878.9556  | 1755.8966 | 1755.8944 | 0.0022  | 0 | S.WNSGALTSGVHTFPAVL.Q       | (Ions score 65) |
| 162 - 178 | 878.9556  | 1755.8966 | 1755.8944 | 0.0022  | 0 | S.WNSGALTSGVHTFPAVL.Q       | (Ions score 41) |
| 162 - 179 | 942.9847  | 1883.9549 | 1883.9529 | 0.0020  | 0 | S.WNSGALTSGVHTFPAVLQ.S      | (Ions score 62) |
| 163 - 178 | 785.9149  | 1569.8153 | 1569.8150 | 0.0002  | 0 | W.NSGALTSGVHTFPAVL.Q        | (Ions score 83) |
| 163 - 178 | 785.9152  | 1569.8158 | 1569.8150 | 0.0007  | 0 | W.NSGALTSGVHTFPAVL.Q        | (Ions score 48) |
| 168 - 178 | 564.8049  | 1127.5953 | 1127.5975 | -0.0022 | 0 | L.TSGVHTFPAVL.Q             | (Ions score 47) |
| 168 - 178 | 564.8055  | 1127.5965 | 1127.5975 | -0.0009 | 0 | L.TSGVHTFPAVL.Q             | (Ions score 30) |
| 170 - 178 | 470.7657  | 939.5169  | 939.5178  | -0.0009 | 0 | S.GVHTFPAVL.Q               | (Ions score 22) |
| 170 - 178 | 470.7659  | 939.5172  | 939.5178  | -0.0005 | 0 | S.GVHTFPAVL.Q               | (Ions score 24) |
| 170 - 178 | 470.7661  | 939.5176  | 939.5178  | -0.0002 | 0 | S.GVHTFPAVL.Q               | (Ions score 20) |
| 170 - 178 | 470.7662  | 939.5179  | 939.5178  | 0.0001  | 0 | S.GVHTFPAVL.Q               | (Ions score 29) |
| 170 - 178 | 940.5266  | 939.5193  | 939.5178  | 0.0015  | 0 | S.GVHTFPAVL.Q               | (Ions score 30) |
| 173 - 178 | 647.3764  | 646.3691  | 646.3690  | 0.0001  | 0 | H.TFPAVL.Q                  | (Ions score 22) |
| 173 - 178 | 647.3768  | 646.3696  | 646.3690  | 0.0006  | 0 | H.TFPAVL.Q                  | (Ions score 23) |
| 173 - 178 | 647.3775  | 646.3702  | 646.3690  | 0.0012  | 0 | H.TFPAVL.Q                  | (Ions score 28) |
| 173 - 179 | 388.2208  | 774.4270  | 774.4276  | -0.0005 | 0 | H.TFPAVLQ.S                 | (Ions score 33) |
| 173 - 179 | 388.2209  | 774.4272  | 774.4276  | -0.0003 | 0 | H.TFPAVLQ.S                 | (Ions score 32) |
| 173 - 179 | 388.2211  | 774.4276  | 774.4276  | 0.0001  | 0 | H.TFPAVLQ.S                 | (Ions score 37) |
| 173 - 179 | 388.2211  | 774.4276  | 774.4276  | 0.0001  | 0 | H.TFPAVLQ.S                 | (Ions score 35) |
| 173 - 179 | 388.2211  | 774.4277  | 774.4276  | 0.0001  | 0 | H.TFPAVLQ.S                 | (Ions score 29) |
| 173 - 179 | 775.4390  | 774.4317  | 774.4276  | 0.0042  | 0 | H.TFPAVLQ.S                 | (Ions score 22) |
| 173 - 184 | 641.8373  | 1281.6601 | 1281.6605 | -0.0003 | 0 | H.TFPAVLQSSGLY.S            | (Ions score 24) |
| 173 - 184 | 641.8377  | 1281.6609 | 1281.6605 | 0.0004  | 0 | H.TFPAVLQSSGLY.S            | (Ions score 23) |
| 173 - 184 | 641.8379  | 1281.6612 | 1281.6605 | 0.0008  | 0 | H.TFPAVLQSSGLY.S            | (Ions score 30) |
| 173 - 184 | 641.8380  | 1281.6614 | 1281.6605 | 0.0009  | 0 | H.TFPAVLQSSGLY.S            | (Ions score 23) |
| 185 - 197 | 631.8458  | 1261.6770 | 1261.6765 | 0.0005  | 0 | Y.SLSSVVTVPSSSL.G           | (Ions score 35) |
| 185 - 197 | 631.8462  | 1261.6778 | 1261.6765 | 0.0013  | 0 | Y.SLSSVVTVPSSSL.G           | (Ions score 42) |
| 185 - 197 | 631.8464  | 1261.6782 | 1261.6765 | 0.0017  | 0 | Y.SLSSVVTVPSSSL.G           | (Ions score 34) |
| 185 - 200 | 774.9111  | 1547.8076 | 1547.8042 | 0.0034  | 0 | Y.SLSSVVTVPSSSLGTQ.T        | (Ions score 22) |
| 187 - 200 | 674.8537  | 1347.6928 | 1347.6881 | 0.0047  | 0 | L.SSVVTVPPSSSLGTQ.T         | (Ions score 47) |
| 187 - 200 | 674.8544  | 1347.6942 | 1347.6881 | 0.0060  | 0 | L.SSVVTVPPSSSLGTQ.T         | (Ions score 69) |
| 187 - 200 | 1348.7015 | 1347.6943 | 1347.6881 | 0.0061  | 0 | L.SSVVTVPPSSSLGTQ.T         | (Ions score 43) |
| 188 - 200 | 631.3360  | 1260.6574 | 1260.6561 | 0.0013  | 0 | S.SVVTVPPSSSLGTQ.T          | (Ions score 50) |
| 188 - 200 | 631.3376  | 1260.6607 | 1260.6561 | 0.0046  | 0 | S.SVVTVPPSSSLGTQ.T          | (Ions score 80) |
| 188 - 202 | 763.3914  | 1524.7682 | 1524.7671 | 0.0010  | 0 | S.SVVTVPPSSSLGTQTY.I        | (Ions score 56) |
| 188 - 202 | 763.3917  | 1524.7688 | 1524.7671 | 0.0017  | 0 | S.SVVTVPPSSSLGTQTY.I        | (Ions score 47) |
| 188 - 202 | 763.3917  | 1524.7688 | 1524.7671 | 0.0017  | 0 | S.SVVTVPPSSSLGTQTY.I        | (Ions score 26) |

|           |          |           |           |         |   |                       |                 |
|-----------|----------|-----------|-----------|---------|---|-----------------------|-----------------|
| 191 - 200 | 488.7506 | 975.4867  | 975.4873  | -0.0006 | 0 | V.TVPSSSLGTQ.T        | (Ions score 33) |
| 191 - 200 | 488.7509 | 975.4872  | 975.4873  | -0.0001 | 0 | V.TVPSSSLGTQ.T        | (Ions score 54) |
| 191 - 200 | 488.7509 | 975.4872  | 975.4873  | -0.0001 | 0 | V.TVPSSSLGTQ.T        | (Ions score 26) |
| 191 - 200 | 976.5012 | 975.4939  | 975.4873  | 0.0067  | 0 | V.TVPSSSLGTQ.T        | (Ions score 27) |
| 205 - 211 | 398.2090 | 794.4035  | 794.4035  | 0.0000  | 0 | C.NVNHKPS.N           | (Ions score 27) |
| 223 - 239 | 991.9439 | 1981.8733 | 1981.8696 | 0.0037  | 0 | K.SCDKTHTCPPCPAPELL.G | (Ions score 33) |
| 223 - 239 | 661.6321 | 1981.8746 | 1981.8696 | 0.0050  | 0 | K.SCDKTHTCPPCPAPELL.G | (Ions score 24) |
| 223 - 239 | 661.6322 | 1981.8748 | 1981.8696 | 0.0052  | 0 | K.SCDKTHTCPPCPAPELL.G | (Ions score 21) |
| 223 - 239 | 661.6326 | 1981.8759 | 1981.8696 | 0.0063  | 0 | K.SCDKTHTCPPCPAPELL.G | (Ions score 34) |
| 223 - 239 | 661.6328 | 1981.8764 | 1981.8696 | 0.0068  | 0 | K.SCDKTHTCPPCPAPELL.G | (Ions score 20) |
| 223 - 239 | 661.6332 | 1981.8779 | 1981.8696 | 0.0083  | 0 | K.SCDKTHTCPPCPAPELL.G | (Ions score 24) |
| 223 - 239 | 991.9462 | 1981.8779 | 1981.8696 | 0.0083  | 0 | K.SCDKTHTCPPCPAPELL.G | (Ions score 44) |
| 223 - 239 | 661.6340 | 1981.8801 | 1981.8696 | 0.0105  | 0 | K.SCDKTHTCPPCPAPELL.G | (Ions score 21) |
| 223 - 239 | 991.9479 | 1981.8812 | 1981.8696 | 0.0116  | 0 | K.SCDKTHTCPPCPAPELL.G | (Ions score 44) |
| 225 - 239 | 579.2779 | 1734.8119 | 1734.8069 | 0.0049  | 0 | C.DKTHTCPPCPAPELL.G   | (Ions score 20) |
| 225 - 239 | 579.2783 | 1734.8129 | 1734.8069 | 0.0060  | 0 | C.DKTHTCPPCPAPELL.G   | (Ions score 36) |
| 225 - 239 | 868.4147 | 1734.8148 | 1734.8069 | 0.0079  | 0 | C.DKTHTCPPCPAPELL.G   | (Ions score 50) |
| 225 - 239 | 868.4150 | 1734.8154 | 1734.8069 | 0.0085  | 0 | C.DKTHTCPPCPAPELL.G   | (Ions score 65) |
| 227 - 239 | 746.8442 | 1491.6738 | 1491.6850 | -0.0112 | 0 | K.THTCPPCPAPELL.G     | (Ions score 37) |
| 227 - 239 | 746.8452 | 1491.6759 | 1491.6850 | -0.0092 | 0 | K.THTCPPCPAPELL.G     | (Ions score 50) |
| 227 - 239 | 746.8456 | 1491.6766 | 1491.6850 | -0.0084 | 0 | K.THTCPPCPAPELL.G     | (Ions score 52) |
| 227 - 239 | 746.8498 | 1491.6850 | 1491.6850 | 0.0000  | 0 | K.THTCPPCPAPELL.G     | (Ions score 47) |
| 229 - 239 | 627.7966 | 1253.5787 | 1253.5784 | 0.0003  | 0 | H.TCPPCPAPELL.G       | (Ions score 30) |
| 229 - 239 | 627.7972 | 1253.5799 | 1253.5784 | 0.0015  | 0 | H.TCPPCPAPELL.G       | (Ions score 41) |
| 229 - 239 | 627.7974 | 1253.5802 | 1253.5784 | 0.0017  | 0 | H.TCPPCPAPELL.G       | (Ions score 62) |
| 229 - 239 | 627.7974 | 1253.5802 | 1253.5784 | 0.0017  | 0 | H.TCPPCPAPELL.G       | (Ions score 57) |
| 229 - 239 | 627.7977 | 1253.5808 | 1253.5784 | 0.0024  | 0 | H.TCPPCPAPELL.G       | (Ions score 63) |
| 229 - 239 | 627.7977 | 1253.5808 | 1253.5784 | 0.0024  | 0 | H.TCPPCPAPELL.G       | (Ions score 40) |
| 246 - 252 | 413.7647 | 825.5149  | 825.5112  | 0.0036  | 0 | F.LFPPKPKD.M          | (Ions score 25) |
| 246 - 255 | 385.8943 | 1154.6611 | 1154.6699 | -0.0088 | 0 | F.LFPPKPKDTL.M        | (Ions score 29) |
| 246 - 255 | 385.8963 | 1154.6670 | 1154.6699 | -0.0029 | 0 | F.LFPPKPKDTL.M        | (Ions score 23) |
| 246 - 255 | 578.3408 | 1154.6671 | 1154.6699 | -0.0028 | 0 | F.LFPPKPKDTL.M        | (Ions score 22) |
| 246 - 255 | 578.3408 | 1154.6671 | 1154.6699 | -0.0028 | 0 | F.LFPPKPKDTL.M        | (Ions score 28) |
| 246 - 255 | 578.3409 | 1154.6672 | 1154.6699 | -0.0027 | 0 | F.LFPPKPKDTL.M        | (Ions score 22) |
| 246 - 255 | 385.8965 | 1154.6677 | 1154.6699 | -0.0022 | 0 | F.LFPPKPKDTL.M        | (Ions score 28) |
| 246 - 255 | 578.3412 | 1154.6678 | 1154.6699 | -0.0021 | 0 | F.LFPPKPKDTL.M        | (Ions score 25) |
| 246 - 255 | 578.3413 | 1154.6681 | 1154.6699 | -0.0019 | 0 | F.LFPPKPKDTL.M        | (Ions score 31) |
| 246 - 255 | 578.3414 | 1154.6683 | 1154.6699 | -0.0016 | 0 | F.LFPPKPKDTL.M        | (Ions score 27) |
| 246 - 255 | 578.3416 | 1154.6687 | 1154.6699 | -0.0012 | 0 | F.LFPPKPKDTL.M        | (Ions score 27) |
| 246 - 255 | 578.3419 | 1154.6692 | 1154.6699 | -0.0008 | 0 | F.LFPPKPKDTL.M        | (Ions score 30) |
| 246 - 255 | 385.8970 | 1154.6693 | 1154.6699 | -0.0006 | 0 | F.LFPPKPKDTL.M        | (Ions score 26) |
| 246 - 255 | 385.8971 | 1154.6694 | 1154.6699 | -0.0006 | 0 | F.LFPPKPKDTL.M        | (Ions score 25) |
| 246 - 255 | 578.3420 | 1154.6694 | 1154.6699 | -0.0005 | 0 | F.LFPPKPKDTL.M        | (Ions score 22) |
| 246 - 255 | 385.8971 | 1154.6695 | 1154.6699 | -0.0005 | 0 | F.LFPPKPKDTL.M        | (Ions score 31) |
| 246 - 255 | 578.3421 | 1154.6697 | 1154.6699 | -0.0003 | 0 | F.LFPPKPKDTL.M        | (Ions score 21) |
| 246 - 255 | 385.8973 | 1154.6701 | 1154.6699 | 0.0002  | 0 | F.LFPPKPKDTL.M        | (Ions score 25) |
| 246 - 255 | 578.3423 | 1154.6701 | 1154.6699 | 0.0002  | 0 | F.LFPPKPKDTL.M        | (Ions score 25) |
| 246 - 255 | 578.3423 | 1154.6701 | 1154.6699 | 0.0002  | 0 | F.LFPPKPKDTL.M        | (Ions score 39) |
| 246 - 255 | 578.3424 | 1154.6703 | 1154.6699 | 0.0003  | 0 | F.LFPPKPKDTL.M        | (Ions score 23) |
| 246 - 255 | 385.8974 | 1154.6703 | 1154.6699 | 0.0004  | 0 | F.LFPPKPKDTL.M        | (Ions score 28) |
| 246 - 255 | 385.8974 | 1154.6704 | 1154.6699 | 0.0004  | 0 | F.LFPPKPKDTL.M        | (Ions score 33) |
| 246 - 255 | 385.8974 | 1154.6704 | 1154.6699 | 0.0004  | 0 | F.LFPPKPKDTL.M        | (Ions score 24) |
| 246 - 255 | 578.3425 | 1154.6705 | 1154.6699 | 0.0006  | 0 | F.LFPPKPKDTL.M        | (Ions score 21) |
| 246 - 255 | 385.8975 | 1154.6706 | 1154.6699 | 0.0006  | 0 | F.LFPPKPKDTL.M        | (Ions score 22) |
| 246 - 255 | 385.8975 | 1154.6706 | 1154.6699 | 0.0007  | 0 | F.LFPPKPKDTL.M        | (Ions score 24) |
| 246 - 255 | 578.3428 | 1154.6710 | 1154.6699 | 0.0011  | 0 | F.LFPPKPKDTL.M        | (Ions score 21) |
| 246 - 255 | 385.8978 | 1154.6716 | 1154.6699 | 0.0016  | 0 | F.LFPPKPKDTL.M        | (Ions score 20) |
| 246 - 255 | 578.3431 | 1154.6717 | 1154.6699 | 0.0018  | 0 | F.LFPPKPKDTL.M        | (Ions score 37) |
| 246 - 255 | 385.8979 | 1154.6718 | 1154.6699 | 0.0019  | 0 | F.LFPPKPKDTL.M        | (Ions score 29) |
| 246 - 255 | 385.8988 | 1154.6746 | 1154.6699 | 0.0047  | 0 | F.LFPPKPKDTL.M        | (Ions score 22) |
| 246 - 258 | 743.9157 | 1485.8169 | 1485.8265 | -0.0096 | 0 | F.LFPPKPKDTLMIS.R     | (Ions score 37) |
| 246 - 258 | 496.2799 | 1485.8180 | 1485.8265 | -0.0085 | 0 | F.LFPPKPKDTLMIS.R     | (Ions score 20) |
| 246 - 258 | 743.9165 | 1485.8185 | 1485.8265 | -0.0080 | 0 | F.LFPPKPKDTLMIS.R     | (Ions score 30) |
| 246 - 258 | 743.9171 | 1485.8197 | 1485.8265 | -0.0068 | 0 | F.LFPPKPKDTLMIS.R     | (Ions score 37) |
| 246 - 258 | 743.9193 | 1485.8239 | 1485.8265 | -0.0025 | 0 | F.LFPPKPKDTLMIS.R     | (Ions score 32) |
| 246 - 258 | 743.9217 | 1485.8288 | 1485.8265 | 0.0023  | 0 | F.LFPPKPKDTLMIS.R     | (Ions score 34) |
| 246 - 258 | 743.9222 | 1485.8299 | 1485.8265 | 0.0034  | 0 | F.LFPPKPKDTLMIS.R     | (Ions score 28) |
| 246 - 258 | 743.9225 | 1485.8304 | 1485.8265 | 0.0039  | 0 | F.LFPPKPKDTLMIS.R     | (Ions score 37) |
| 246 - 258 | 743.9231 | 1485.8316 | 1485.8265 | 0.0051  | 0 | F.LFPPKPKDTLMIS.R     | (Ions score 36) |
| 265 - 278 | 806.3873 | 1610.7601 | 1610.7610 | -0.0009 | 0 | T.CVVVDVSHEDPEVK.F    | (Ions score 71) |
| 265 - 278 | 806.3883 | 1610.7621 | 1610.7610 | 0.0011  | 0 | T.CVVVDVSHEDPEVK.F    | (Ions score 70) |
| 265 - 278 | 537.9283 | 1610.7632 | 1610.7610 | 0.0022  | 0 | T.CVVVDVSHEDPEVK.F    | (Ions score 30) |
| 265 - 278 | 537.9283 | 1610.7632 | 1610.7610 | 0.0022  | 0 | T.CVVVDVSHEDPEVK.F    | (Ions score 36) |
| 265 - 280 | 624.9657 | 1871.8753 | 1871.8723 | 0.0030  | 0 | T.CVVVDVSHEDPEVKFN.W  | (Ions score 53) |
| 269 - 280 | 472.5527 | 1414.6364 | 1414.6364 | -0.0001 | 0 | V.DVSHEDPEVKFN.W      | (Ions score 35) |
| 269 - 280 | 472.5529 | 1414.6370 | 1414.6364 | 0.0006  | 0 | V.DVSHEDPEVKFN.W      | (Ions score 23) |
| 269 - 280 | 708.3270 | 1414.6395 | 1414.6364 | 0.0031  | 0 | V.DVSHEDPEVKFN.W      | (Ions score 33) |
| 270 - 278 | 347.1733 | 1038.4980 | 1038.4982 | -0.0001 | 0 | D.VSHEDPEVK.F         | (Ions score 25) |
| 270 - 278 | 520.2583 | 1038.5021 | 1038.4982 | 0.0039  | 0 | D.VSHEDPEVK.F         | (Ions score 43) |
| 270 - 278 | 347.1747 | 1038.5022 | 1038.4982 | 0.0041  | 0 | D.VSHEDPEVK.F         | (Ions score 30) |
| 270 - 280 | 434.2101 | 1299.6084 | 1299.6095 | -0.0011 | 0 | D.VSHEDPEVKFN.W       | (Ions score 47) |
| 270 - 280 | 650.8120 | 1299.6095 | 1299.6095 | -0.0000 | 0 | D.VSHEDPEVKFN.W       | (Ions score 56) |
| 270 - 280 | 434.2105 | 1299.6098 | 1299.6095 | 0.0003  | 0 | D.VSHEDPEVKFN.W       | (Ions score 46) |
| 270 - 280 | 434.2106 | 1299.6100 | 1299.6095 | 0.0005  | 0 | D.VSHEDPEVKFN.W       | (Ions score 35) |
| 270 - 280 | 650.8127 | 1299.6108 | 1299.6095 | 0.0013  | 0 | D.VSHEDPEVKFN.W       | (Ions score 49) |
| 271 - 280 | 401.1879 | 1200.5419 | 1200.5411 | 0.0008  | 0 | V.SHEDPEVKFN.W        | (Ions score 45) |
| 271 - 280 | 601.2786 | 1200.5426 | 1200.5411 | 0.0015  | 0 | V.SHEDPEVKFN.W        | (Ions score 55) |
| 272 - 280 | 557.7604 | 1113.5063 | 1113.5090 | -0.0027 | 0 | S.HEDPEVKFN.W         | (Ions score 49) |
| 272 - 280 | 557.7612 | 1113.5079 | 1113.5090 | -0.0011 | 0 | S.HEDPEVKFN.W         | (Ions score 46) |
| 272 - 280 | 557.7615 | 1113.5084 | 1113.5090 | -0.0006 | 0 | S.HEDPEVKFN.W         | (Ions score 49) |
| 272 - 280 | 557.7621 | 1113.5096 | 1113.5090 | 0.0006  | 0 | S.HEDPEVKFN.W         | (Ions score 35) |
| 272 - 280 | 557.7632 | 1113.5118 | 1113.5090 | 0.0028  | 0 | S.HEDPEVKFN.W         | (Ions score 39) |

|           |          |           |           |         |   |                            |                 |
|-----------|----------|-----------|-----------|---------|---|----------------------------|-----------------|
| 275 - 280 | 367.1965 | 732.3785  | 732.3806  | -0.0021 | 0 | D.PEVKFN.W                 | (Ions score 26) |
| 279 - 289 | 682.8171 | 1363.6197 | 1363.6196 | 0.0001  | 0 | K.FNWWYVDGVEVH.N           | (Ions score 70) |
| 279 - 289 | 682.8174 | 1363.6202 | 1363.6196 | 0.0006  | 0 | K.FNWWYVDGVEVH.N           | (Ions score 36) |
| 279 - 289 | 682.8175 | 1363.6205 | 1363.6196 | 0.0008  | 0 | K.FNWWYVDGVEVH.N           | (Ions score 72) |
| 281 - 286 | 738.3460 | 737.3387  | 737.3384  | 0.0003  | 0 | N.WYVDGV.E                 | (Ions score 37) |
| 281 - 286 | 738.3467 | 737.3395  | 737.3384  | 0.0011  | 0 | N.WYVDGV.E                 | (Ions score 41) |
| 281 - 289 | 552.2599 | 1102.5053 | 1102.5083 | -0.0030 | 0 | N.WYVDGVEVH.N              | (Ions score 48) |
| 281 - 289 | 552.2606 | 1102.5067 | 1102.5083 | -0.0016 | 0 | N.WYVDGVEVH.N              | (Ions score 45) |
| 281 - 289 | 552.2610 | 1102.5075 | 1102.5083 | -0.0008 | 0 | N.WYVDGVEVH.N              | (Ions score 48) |
| 281 - 289 | 552.2611 | 1102.5077 | 1102.5083 | -0.0007 | 0 | N.WYVDGVEVH.N              | (Ions score 48) |
| 281 - 289 | 552.2612 | 1102.5079 | 1102.5083 | -0.0004 | 0 | N.WYVDGVEVH.N              | (Ions score 58) |
| 281 - 289 | 552.2614 | 1102.5082 | 1102.5083 | -0.0002 | 0 | N.WYVDGVEVH.N              | (Ions score 48) |
| 281 - 289 | 552.2614 | 1102.5082 | 1102.5083 | -0.0002 | 0 | N.WYVDGVEVH.N              | (Ions score 48) |
| 281 - 289 | 552.2614 | 1102.5083 | 1102.5083 | -0.0000 | 0 | N.WYVDGVEVH.N              | (Ions score 48) |
| 281 - 289 | 552.2615 | 1102.5085 | 1102.5083 | 0.0002  | 0 | N.WYVDGVEVH.N              | (Ions score 48) |
| 281 - 289 | 552.2615 | 1102.5085 | 1102.5083 | 0.0002  | 0 | N.WYVDGVEVH.N              | (Ions score 49) |
| 281 - 289 | 552.2616 | 1102.5086 | 1102.5083 | 0.0003  | 0 | N.WYVDGVEVH.N              | (Ions score 48) |
| 281 - 289 | 552.2616 | 1102.5086 | 1102.5083 | 0.0003  | 0 | N.WYVDGVEVH.N              | (Ions score 48) |
| 281 - 289 | 552.2616 | 1102.5086 | 1102.5083 | 0.0003  | 0 | N.WYVDGVEVH.N              | (Ions score 48) |
| 281 - 289 | 552.2617 | 1102.5088 | 1102.5083 | 0.0004  | 0 | N.WYVDGVEVH.N              | (Ions score 48) |
| 281 - 289 | 552.2617 | 1102.5089 | 1102.5083 | 0.0006  | 0 | N.WYVDGVEVH.N              | (Ions score 52) |
| 281 - 289 | 552.2617 | 1102.5089 | 1102.5083 | 0.0006  | 0 | N.WYVDGVEVH.N              | (Ions score 48) |
| 281 - 289 | 552.2618 | 1102.5090 | 1102.5083 | 0.0007  | 0 | N.WYVDGVEVH.N              | (Ions score 42) |
| 281 - 289 | 552.2621 | 1102.5096 | 1102.5083 | 0.0013  | 0 | N.WYVDGVEVH.N              | (Ions score 45) |
| 282 - 289 | 459.2223 | 916.4301  | 916.4290  | 0.0011  | 0 | W.YVDGVEVH.N               | (Ions score 43) |
| 311 - 319 | 563.2888 | 1124.5631 | 1124.5614 | 0.0016  | 0 | L.TVLHQDWLN.G              | (Ions score 23) |
| 311 - 319 | 563.2895 | 1124.5644 | 1124.5614 | 0.0030  | 0 | L.TVLHQDWLN.G              | (Ions score 51) |
| 311 - 319 | 563.2896 | 1124.5647 | 1124.5614 | 0.0032  | 0 | L.TVLHQDWLN.G              | (Ions score 58) |
| 311 - 321 | 437.5673 | 1309.6801 | 1309.6779 | 0.0023  | 0 | L.TVLHQDWLNGK.E            | (Ions score 21) |
| 320 - 328 | 366.8583 | 1097.5532 | 1097.5539 | -0.0007 | 0 | N.GKEYKCKVS.N              | (Ions score 23) |
| 320 - 328 | 549.7848 | 1097.5550 | 1097.5539 | 0.0011  | 0 | N.GKEYKCKVS.N              | (Ions score 29) |
| 329 - 341 | 461.2696 | 1380.7870 | 1380.7976 | -0.0106 | 0 | S.NKALPAPIEKTIS.K          | (Ions score 40) |
| 329 - 341 | 691.4021 | 1380.7896 | 1380.7976 | -0.0080 | 0 | S.NKALPAPIEKTIS.K          | (Ions score 36) |
| 329 - 341 | 461.2729 | 1380.7968 | 1380.7976 | -0.0008 | 0 | S.NKALPAPIEKTIS.K          | (Ions score 56) |
| 329 - 341 | 461.2732 | 1380.7978 | 1380.7976 | 0.0002  | 0 | S.NKALPAPIEKTIS.K          | (Ions score 46) |
| 329 - 341 | 691.4064 | 1380.7982 | 1380.7976 | 0.0006  | 0 | S.NKALPAPIEKTIS.K          | (Ions score 31) |
| 329 - 341 | 461.2733 | 1380.7982 | 1380.7976 | 0.0006  | 0 | S.NKALPAPIEKTIS.K          | (Ions score 28) |
| 329 - 341 | 691.4065 | 1380.7984 | 1380.7976 | 0.0008  | 0 | S.NKALPAPIEKTIS.K          | (Ions score 33) |
| 329 - 341 | 691.4066 | 1380.7986 | 1380.7976 | 0.0009  | 0 | S.NKALPAPIEKTIS.K          | (Ions score 32) |
| 329 - 341 | 691.4066 | 1380.7987 | 1380.7976 | 0.0011  | 0 | S.NKALPAPIEKTIS.K          | (Ions score 35) |
| 329 - 341 | 691.4066 | 1380.7987 | 1380.7976 | 0.0011  | 0 | S.NKALPAPIEKTIS.K          | (Ions score 33) |
| 329 - 341 | 691.4068 | 1380.7990 | 1380.7976 | 0.0014  | 0 | S.NKALPAPIEKTIS.K          | (Ions score 28) |
| 329 - 341 | 691.4072 | 1380.7999 | 1380.7976 | 0.0023  | 0 | S.NKALPAPIEKTIS.K          | (Ions score 36) |
| 329 - 341 | 691.4075 | 1380.8004 | 1380.7976 | 0.0028  | 0 | S.NKALPAPIEKTIS.K          | (Ions score 39) |
| 329 - 341 | 691.4078 | 1380.8010 | 1380.7976 | 0.0034  | 0 | S.NKALPAPIEKTIS.K          | (Ions score 36) |
| 329 - 341 | 691.4091 | 1380.8036 | 1380.7976 | 0.0059  | 0 | S.NKALPAPIEKTIS.K          | (Ions score 39) |
| 331 - 341 | 570.3286 | 1138.6427 | 1138.6597 | -0.0171 | 0 | K.ALPAPIEKTIS.K            | (Ions score 28) |
| 331 - 341 | 570.3334 | 1138.6523 | 1138.6597 | -0.0074 | 0 | K.ALPAPIEKTIS.K            | (Ions score 27) |
| 331 - 341 | 570.3378 | 1138.6611 | 1138.6597 | 0.0014  | 0 | K.ALPAPIEKTIS.K            | (Ions score 41) |
| 331 - 341 | 570.3387 | 1138.6628 | 1138.6597 | 0.0031  | 0 | K.ALPAPIEKTIS.K            | (Ions score 26) |
| 331 - 341 | 570.3394 | 1138.6643 | 1138.6597 | 0.0045  | 0 | K.ALPAPIEKTIS.K            | (Ions score 34) |
| 331 - 341 | 570.3401 | 1138.6657 | 1138.6597 | 0.0060  | 0 | K.ALPAPIEKTIS.K            | (Ions score 48) |
| 331 - 353 | 841.1426 | 2520.4061 | 2520.4063 | -0.0002 | 0 | K.ALPAPIEKTISKAKGQPREQVY.T | (Ions score 21) |
| 342 - 353 | 467.5886 | 1399.7439 | 1399.7571 | -0.0133 | 0 | S.KAKGQPREQVY.T            | (Ions score 23) |
| 342 - 353 | 467.5926 | 1399.7560 | 1399.7571 | -0.0011 | 0 | S.KAKGQPREQVY.T            | (Ions score 23) |
| 342 - 353 | 467.5931 | 1399.7574 | 1399.7571 | 0.0003  | 0 | S.KAKGQPREQVY.T            | (Ions score 22) |
| 342 - 353 | 467.5932 | 1399.7577 | 1399.7571 | 0.0005  | 0 | S.KAKGQPREQVY.T            | (Ions score 21) |
| 342 - 353 | 700.8862 | 1399.7579 | 1399.7571 | 0.0008  | 0 | S.KAKGQPREQVY.T            | (Ions score 23) |
| 342 - 353 | 467.5945 | 1399.7615 | 1399.7571 | 0.0044  | 0 | S.KAKGQPREQVY.T            | (Ions score 21) |
| 343 - 353 | 636.8416 | 1271.6687 | 1271.6622 | 0.0065  | 0 | K.AKGQPREQVY.T             | (Ions score 29) |
| 345 - 353 | 537.2710 | 1072.5274 | 1072.5301 | -0.0027 | 0 | K.QPREQVY.T                | (Ions score 38) |
| 345 - 353 | 537.2719 | 1072.5292 | 1072.5301 | -0.0010 | 0 | K.QPREQVY.T                | (Ions score 33) |
| 345 - 353 | 537.2719 | 1072.5293 | 1072.5301 | -0.0008 | 0 | K.QPREQVY.T                | (Ions score 30) |
| 345 - 353 | 537.2722 | 1072.5299 | 1072.5301 | -0.0002 | 0 | K.QPREQVY.T                | (Ions score 39) |
| 345 - 353 | 537.2726 | 1072.5306 | 1072.5301 | 0.0005  | 0 | K.QPREQVY.T                | (Ions score 43) |
| 354 - 365 | 685.8605 | 1369.7065 | 1369.7201 | -0.0136 | 0 | Y.TLPPSRDELTKN.Q           | (Ions score 42) |
| 354 - 365 | 685.8618 | 1369.7091 | 1369.7201 | -0.0110 | 0 | Y.TLPPSRDELTKN.Q           | (Ions score 35) |
| 354 - 365 | 685.8646 | 1369.7146 | 1369.7201 | -0.0055 | 0 | Y.TLPPSRDELTKN.Q           | (Ions score 40) |
| 354 - 365 | 685.8660 | 1369.7174 | 1369.7201 | -0.0027 | 0 | Y.TLPPSRDELTKN.Q           | (Ions score 43) |
| 354 - 365 | 685.8660 | 1369.7175 | 1369.7201 | -0.0026 | 0 | Y.TLPPSRDELTKN.Q           | (Ions score 39) |
| 354 - 365 | 685.8662 | 1369.7179 | 1369.7201 | -0.0023 | 0 | Y.TLPPSRDELTKN.Q           | (Ions score 55) |
| 354 - 365 | 685.8662 | 1369.7179 | 1369.7201 | -0.0023 | 0 | Y.TLPPSRDELTKN.Q           | (Ions score 24) |
| 354 - 365 | 685.8671 | 1369.7196 | 1369.7201 | -0.0005 | 0 | Y.TLPPSRDELTKN.Q           | (Ions score 42) |
| 354 - 365 | 685.8672 | 1369.7198 | 1369.7201 | -0.0003 | 0 | Y.TLPPSRDELTKN.Q           | (Ions score 45) |
| 354 - 365 | 685.8672 | 1369.7198 | 1369.7201 | -0.0003 | 0 | Y.TLPPSRDELTKN.Q           | (Ions score 44) |
| 354 - 365 | 685.8672 | 1369.7198 | 1369.7201 | -0.0003 | 0 | Y.TLPPSRDELTKN.Q           | (Ions score 37) |
| 354 - 365 | 685.8672 | 1369.7198 | 1369.7201 | -0.0003 | 0 | Y.TLPPSRDELTKN.Q           | (Ions score 40) |
| 354 - 365 | 685.8674 | 1369.7203 | 1369.7201 | 0.0002  | 0 | Y.TLPPSRDELTKN.Q           | (Ions score 34) |
| 354 - 365 | 685.8676 | 1369.7206 | 1369.7201 | 0.0004  | 0 | Y.TLPPSRDELTKN.Q           | (Ions score 41) |
| 354 - 365 | 685.8686 | 1369.7226 | 1369.7201 | 0.0025  | 0 | Y.TLPPSRDELTKN.Q           | (Ions score 36) |
| 354 - 365 | 685.8687 | 1369.7229 | 1369.7201 | 0.0028  | 0 | Y.TLPPSRDELTKN.Q           | (Ions score 42) |
| 354 - 365 | 685.8690 | 1369.7235 | 1369.7201 | 0.0034  | 0 | Y.TLPPSRDELTKN.Q           | (Ions score 50) |
| 354 - 365 | 685.8701 | 1369.7256 | 1369.7201 | 0.0054  | 0 | Y.TLPPSRDELTKN.Q           | (Ions score 45) |
| 354 - 365 | 685.8713 | 1369.7280 | 1369.7201 | 0.0079  | 0 | Y.TLPPSRDELTKN.Q           | (Ions score 35) |
| 354 - 365 | 685.8742 | 1369.7339 | 1369.7201 | 0.0137  | 0 | Y.TLPPSRDELTKN.Q           | (Ions score 39) |
| 354 - 365 | 685.8743 | 1369.7340 | 1369.7201 | 0.0139  | 0 | Y.TLPPSRDELTKN.Q           | (Ions score 37) |
| 354 - 365 | 685.8751 | 1369.7356 | 1369.7201 | 0.0154  | 0 | Y.TLPPSRDELTKN.Q           | (Ions score 43) |
| 354 - 365 | 685.8756 | 1369.7367 | 1369.7201 | 0.0165  | 0 | Y.TLPPSRDELTKN.Q           | (Ions score 41) |
| 354 - 365 | 685.8759 | 1369.7373 | 1369.7201 | 0.0172  | 0 | Y.TLPPSRDELTKN.Q           | (Ions score 39) |
| 354 - 365 | 685.8759 | 1369.7373 | 1369.7201 | 0.0172  | 0 | Y.TLPPSRDELTKN.Q           | (Ions score 42) |
| 354 - 365 | 685.8762 | 1369.7379 | 1369.7201 | 0.0178  | 0 | Y.TLPPSRDELTKN.Q           | (Ions score 42) |
| 354 - 370 | 950.0071 | 1897.9996 | 1898.0109 | -0.0113 | 0 | Y.TLPPSRDELTKNQVSLT.C      | (Ions score 25) |

|           |           |           |           |         |   |                              |                 |
|-----------|-----------|-----------|-----------|---------|---|------------------------------|-----------------|
| 354 - 370 | 950.0112  | 1898.0078 | 1898.0109 | -0.0031 | 0 | Y.TLPPSRDELTKNQVSLT.C        | (Ions score 22) |
| 354 - 370 | 633.6772  | 1898.0099 | 1898.0109 | -0.0010 | 0 | Y.TLPPSRDELTKNQVSLT.C        | (Ions score 25) |
| 354 - 370 | 950.0124  | 1898.0102 | 1898.0109 | -0.0007 | 0 | Y.TLPPSRDELTKNQVSLT.C        | (Ions score 32) |
| 354 - 370 | 950.0127  | 1898.0108 | 1898.0109 | -0.0000 | 0 | Y.TLPPSRDELTKNQVSLT.C        | (Ions score 23) |
| 354 - 370 | 950.0131  | 1898.0117 | 1898.0109 | 0.0008  | 0 | Y.TLPPSRDELTKNQVSLT.C        | (Ions score 25) |
| 354 - 370 | 633.6784  | 1898.0134 | 1898.0109 | 0.0025  | 0 | Y.TLPPSRDELTKNQVSLT.C        | (Ions score 40) |
| 354 - 370 | 633.6788  | 1898.0145 | 1898.0109 | 0.0036  | 0 | Y.TLPPSRDELTKNQVSLT.C        | (Ions score 30) |
| 354 - 370 | 950.0146  | 1898.0146 | 1898.0109 | 0.0037  | 0 | Y.TLPPSRDELTKNQVSLT.C        | (Ions score 45) |
| 354 - 370 | 633.6793  | 1898.0160 | 1898.0109 | 0.0051  | 0 | Y.TLPPSRDELTKNQVSLT.C        | (Ions score 24) |
| 354 - 370 | 633.6793  | 1898.0161 | 1898.0109 | 0.0053  | 0 | Y.TLPPSRDELTKNQVSLT.C        | (Ions score 23) |
| 354 - 370 | 633.6796  | 1898.0169 | 1898.0109 | 0.0060  | 0 | Y.TLPPSRDELTKNQVSLT.C        | (Ions score 24) |
| 354 - 370 | 950.0160  | 1898.0174 | 1898.0109 | 0.0066  | 0 | Y.TLPPSRDELTKNQVSLT.C        | (Ions score 23) |
| 354 - 370 | 633.6806  | 1898.0200 | 1898.0109 | 0.0091  | 0 | Y.TLPPSRDELTKNQVSLT.C        | (Ions score 24) |
| 356 - 365 | 578.8130  | 1155.6114 | 1155.5884 | 0.0230  | 0 | L.PPSRDELTKN.Q               | (Ions score 21) |
| 371 - 384 | 799.4008  | 1596.7870 | 1596.7857 | 0.0012  | 0 | T.CLVKGFPYSDIAVE.W           | (Ions score 45) |
| 375 - 384 | 549.2610  | 1096.5075 | 1096.5076 | -0.0001 | 0 | K.GFYPSDIAVE.W               | (Ions score 30) |
| 375 - 384 | 549.2611  | 1096.5077 | 1096.5076 | 0.0000  | 0 | K.GFYPSDIAVE.W               | (Ions score 42) |
| 375 - 384 | 549.2612  | 1096.5079 | 1096.5076 | 0.0003  | 0 | K.GFYPSDIAVE.W               | (Ions score 56) |
| 375 - 384 | 549.2614  | 1096.5083 | 1096.5076 | 0.0006  | 0 | K.GFYPSDIAVE.W               | (Ions score 64) |
| 375 - 384 | 549.2615  | 1096.5084 | 1096.5076 | 0.0008  | 0 | K.GFYPSDIAVE.W               | (Ions score 58) |
| 375 - 384 | 549.2616  | 1096.5086 | 1096.5076 | 0.0010  | 0 | K.GFYPSDIAVE.W               | (Ions score 34) |
| 385 - 408 | 1341.6031 | 2681.1917 | 2681.1881 | 0.0037  | 0 | E.WESNGQPENNYKTPPVLDSDGSFF.F | (Ions score 32) |
| 385 - 409 | 1415.1372 | 2828.2599 | 2828.2565 | 0.0034  | 0 | E.WESNGQPENNYKTPPVLDSDGSFF.L | (Ions score 32) |
| 385 - 409 | 943.7608  | 2828.2606 | 2828.2565 | 0.0041  | 0 | E.WESNGQPENNYKTPPVLDSDGSFF.L | (Ions score 40) |
| 385 - 409 | 1415.1378 | 2828.2611 | 2828.2565 | 0.0046  | 0 | E.WESNGQPENNYKTPPVLDSDGSFF.L | (Ions score 47) |
| 385 - 409 | 943.7612  | 2828.2619 | 2828.2565 | 0.0054  | 0 | E.WESNGQPENNYKTPPVLDSDGSFF.L | (Ions score 64) |
| 389 - 409 | 1157.0391 | 2312.0636 | 2312.0596 | 0.0039  | 0 | N.GQPENNYKTPPVLDSDGSFF.L     | (Ions score 56) |
| 389 - 409 | 1157.0396 | 2312.0646 | 2312.0596 | 0.0049  | 0 | N.GQPENNYKTPPVLDSDGSFF.L     | (Ions score 51) |
| 395 - 409 | 837.4068  | 1672.7990 | 1672.7984 | 0.0006  | 0 | N.YKTPPVLDSDGSFF.L           | (Ions score 82) |
| 395 - 409 | 837.4075  | 1672.8005 | 1672.7984 | 0.0021  | 0 | N.YKTPPVLDSDGSFF.L           | (Ions score 46) |
| 395 - 409 | 837.4077  | 1672.8008 | 1672.7984 | 0.0023  | 0 | N.YKTPPVLDSDGSFF.L           | (Ions score 78) |
| 397 - 409 | 691.8276  | 1381.6406 | 1381.6401 | 0.0005  | 0 | K.TTPPVLDSDGSFF.L            | (Ions score 39) |
| 397 - 409 | 691.8281  | 1381.6417 | 1381.6401 | 0.0016  | 0 | K.TTPPVLDSDGSFF.L            | (Ions score 87) |
| 397 - 409 | 691.8282  | 1381.6419 | 1381.6401 | 0.0018  | 0 | K.TTPPVLDSDGSFF.L            | (Ions score 58) |
| 397 - 409 | 691.8284  | 1381.6422 | 1381.6401 | 0.0020  | 0 | K.TTPPVLDSDGSFF.L            | (Ions score 67) |
| 398 - 409 | 641.3041  | 1280.5936 | 1280.5925 | 0.0011  | 0 | T.TPPVLDSDGSFF.L             | (Ions score 41) |
| 398 - 409 | 641.3042  | 1280.5938 | 1280.5925 | 0.0014  | 0 | T.TPPVLDSDGSFF.L             | (Ions score 26) |
| 404 - 409 | 659.2677  | 658.2604  | 658.2598  | 0.0006  | 0 | D.SDGSFF.L                   | (Ions score 21) |
| 412 - 417 | 331.6904  | 661.3662  | 661.3646  | 0.0016  | 0 | Y.SKLTVD.K                   | (Ions score 34) |
| 412 - 423 | 492.6095  | 1474.8066 | 1474.7892 | 0.0174  | 0 | Y.SKLTVDKSRWQ.G              | (Ions score 24) |
| 412 - 423 | 492.6131  | 1474.8174 | 1474.7892 | 0.0282  | 0 | Y.SKLTVDKSRWQ.G              | (Ions score 24) |
| 412 - 425 | 549.6312  | 1645.8717 | 1645.8536 | 0.0181  | 0 | Y.SKLTVDKSRWQGN.V            | (Ions score 31) |
| 412 - 427 | 947.0016  | 1891.9886 | 1891.9904 | -0.0018 | 0 | Y.SKLTVDKSRWQGNV.F.S         | (Ions score 50) |
| 412 - 427 | 631.6711  | 1891.9914 | 1891.9904 | 0.0010  | 0 | Y.SKLTVDKSRWQGNV.F.S         | (Ions score 25) |
| 412 - 427 | 947.0034  | 1891.9922 | 1891.9904 | 0.0018  | 0 | Y.SKLTVDKSRWQGNV.F.S         | (Ions score 49) |
| 412 - 429 | 714.0251  | 2139.0534 | 2139.0531 | 0.0004  | 0 | Y.SKLTVDKSRWQGNV.F.S.C       | (Ions score 43) |
| 412 - 429 | 714.0267  | 2139.0582 | 2139.0531 | 0.0051  | 0 | Y.SKLTVDKSRWQGNV.F.S.C       | (Ions score 39) |
| 415 - 427 | 522.2678  | 1563.7816 | 1563.7793 | 0.0023  | 0 | L.TVDKSRWQGNV.F.S            | (Ions score 23) |
| 415 - 427 | 782.8986  | 1563.7826 | 1563.7793 | 0.0032  | 0 | L.TVDKSRWQGNV.F.S            | (Ions score 32) |
| 418 - 427 | 625.3267  | 1248.6388 | 1248.6363 | 0.0025  | 0 | D.KSRWQGNV.F.S               | (Ions score 33) |
| 430 - 436 | 393.6942  | 785.3738  | 785.3741  | -0.0003 | 0 | C.SVMHEAL.H                  | (Ions score 29) |
| 430 - 436 | 393.6942  | 785.3739  | 785.3741  | -0.0003 | 0 | C.SVMHEAL.H                  | (Ions score 26) |
| 430 - 436 | 393.6944  | 785.3742  | 785.3741  | 0.0000  | 0 | C.SVMHEAL.H                  | (Ions score 26) |
| 430 - 436 | 401.6913  | 801.3680  | 801.3691  | -0.0010 | 0 | C.SVMHEAL.H Oxidation (M)    | (Ions score 32) |
| 430 - 436 | 401.6960  | 801.3775  | 801.3691  | 0.0085  | 0 | C.SVMHEAL.H Oxidation (M)    | (Ions score 28) |
| 430 - 443 | 565.6074  | 1693.8003 | 1693.7994 | 0.0008  | 0 | C.SVMHEALHNHYTQK.S           | (Ions score 34) |
| 430 - 450 | 779.3880  | 2335.1422 | 2335.1379 | 0.0043  | 0 | C.SVMHEALHNHYTQKSLSPG.K      | (Ions score 39) |
| 433 - 443 | 459.8932  | 1376.6576 | 1376.6585 | -0.0009 | 0 | M.HEALHNHYTQK.S              | (Ions score 22) |
| 433 - 445 | 526.5985  | 1576.7737 | 1576.7746 | -0.0009 | 0 | M.HEALHNHYTQKSL.S            | (Ions score 34) |
| 433 - 445 | 526.5989  | 1576.7750 | 1576.7746 | 0.0004  | 0 | M.HEALHNHYTQKSL.S            | (Ions score 29) |
| 433 - 450 | 673.6819  | 2018.0238 | 2017.9969 | 0.0269  | 0 | M.HEALHNHYTQKSLSPG.K         | (Ions score 25) |
| 437 - 443 | 464.2251  | 926.4357  | 926.4359  | -0.0001 | 0 | L.HNHYTQK.S                  | (Ions score 22) |
| 437 - 443 | 464.2255  | 926.4365  | 926.4359  | 0.0006  | 0 | L.HNHYTQK.S                  | (Ions score 22) |
| 444 - 451 | 394.7284  | 787.4423  | 787.4439  | -0.0016 | 0 | K.SLSLSPG.K.-                | (Ions score 32) |
| 446 - 450 | 460.2446  | 459.2373  | 459.2329  | 0.0044  | 0 | L.SLSLSPG.K                  | (Ions score 27) |

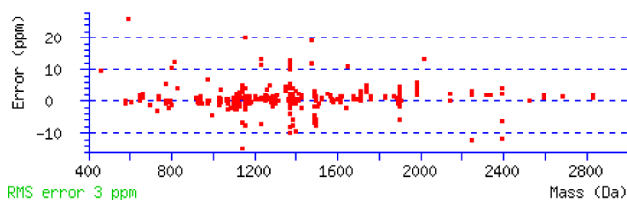

Mascot: <http://www.matrixscience.com/>
