# Supplementary material for: An alternative for proteinase K-heat-sensitive protease from fungus Onygena corvina for biotechnology: cloning, engineering, expression, characterization and special application for protein sequencing
Source: PubMed Central journal article supplement (PMC7313183; doi:10.1186/s12934-020-01392-3), 2020-06-24
Supplement: 12934_2020_1392_MOESM18_ESM.pdf [file 12934_2020_1392_MOESM18_ESM.pdf]

# **MATRIX** Mascot Search Results

## Protein View

Match to: **mAb\_LC** Score: **4682**

Found in search of \\SERVER3\User\Kunden\_Projekte\Koller\_8375\Further-characterization-part-I\8375\_mAb\_HL1\_1070nl.mgf

Nominal mass ( $M_r$ ): **23327**; Calculated pI value: **8.26**

NCBI BLAST search of [mAb\\_LC](#) against nr  
Unformatted [sequence string](#) for pasting into other applications

Fixed modifications: Carbamidomethyl (C)

Variable modifications: Oxidation (M)

No enzyme cleavage specificity

Sequence Coverage: **96%**

Matched peptides shown in **Bold Red**

- 1** QIVLSQSPAI LSASPGEKVT MTCRASSVS YIHWFQKPG SSPKPWIYAT
- 51** SNLASGVPVR FSGSGSGTSY SLTISRVEAE DAATYYCQW TSNPPTFGGG
- 101** TKLEIKRIVA APSVFIFPPS DEQLKSGTAS VVCLLNFFYP REAKVQWKVD
- 151** NALQSGNSQE SVTEQDSKDS TYSLSSTLTL SKADYEKHKV YACEVTHQGL
- 201** SSPVTKSFNR GEC

Sort Peptides By  Residue Number  Increasing Mass  Decreasing Mass

| Start - End | Observed | Mr (expt) | Mr (calc) | Delta   | Miss | Sequence                                                        |
|-------------|----------|-----------|-----------|---------|------|-----------------------------------------------------------------|
| 5 - 11      | 715.3978 | 714.3906  | 714.3912  | -0.0006 | 0    | L.SQSPAIL.S ( <a href="#">Ions score 22</a> )                   |
| 5 - 11      | 715.3981 | 714.3909  | 714.3912  | -0.0003 | 0    | L.SQSPAIL.S ( <a href="#">Ions score 22</a> )                   |
| 5 - 11      | 715.3982 | 714.3909  | 714.3912  | -0.0003 | 0    | L.SQSPAIL.S ( <a href="#">Ions score 28</a> )                   |
| 5 - 11      | 715.3988 | 714.3915  | 714.3912  | 0.0003  | 0    | L.SQSPAIL.S ( <a href="#">Ions score 21</a> )                   |
| 7 - 11      | 500.3072 | 499.2999  | 499.3006  | -0.0007 | 0    | Q.SPAIL.S ( <a href="#">Ions score 26</a> )                     |
| 7 - 11      | 500.3076 | 499.3004  | 499.3006  | -0.0002 | 0    | Q.SPAIL.S ( <a href="#">Ions score 29</a> )                     |
| 12 - 20     | 438.2267 | 874.4389  | 874.4396  | -0.0007 | 0    | L.SASPGEKVT.M ( <a href="#">Ions score 40</a> )                 |
| 12 - 20     | 438.2270 | 874.4394  | 874.4396  | -0.0001 | 0    | L.SASPGEKVT.M ( <a href="#">Ions score 47</a> )                 |
| 12 - 21     | 503.7473 | 1005.4801 | 1005.4801 | 0.0001  | 0    | L.SASPGEKVTM.T ( <a href="#">Ions score 56</a> )                |
| 12 - 21     | 503.7478 | 1005.4811 | 1005.4801 | 0.0010  | 0    | L.SASPGEKVTM.T ( <a href="#">Ions score 54</a> )                |
| 12 - 21     | 503.7530 | 1005.4914 | 1005.4801 | 0.0114  | 0    | L.SASPGEKVTM.T ( <a href="#">Ions score 61</a> )                |
| 12 - 21     | 511.7443 | 1021.4740 | 1021.4750 | -0.0009 | 0    | L.SASPGEKVTM.T Oxidation (M) ( <a href="#">Ions score 38</a> )  |
| 12 - 21     | 511.7445 | 1021.4744 | 1021.4750 | -0.0006 | 0    | L.SASPGEKVTM.T Oxidation (M) ( <a href="#">Ions score 48</a> )  |
| 12 - 21     | 511.7445 | 1021.4745 | 1021.4750 | -0.0005 | 0    | L.SASPGEKVTM.T Oxidation (M) ( <a href="#">Ions score 36</a> )  |
| 12 - 21     | 511.7447 | 1021.4748 | 1021.4750 | -0.0001 | 0    | L.SASPGEKVTM.T Oxidation (M) ( <a href="#">Ions score 51</a> )  |
| 12 - 22     | 554.2710 | 1106.5274 | 1106.5277 | -0.0003 | 0    | L.SASPGEKVTMT.C ( <a href="#">Ions score 54</a> )               |
| 12 - 22     | 554.2710 | 1106.5274 | 1106.5277 | -0.0003 | 0    | L.SASPGEKVTMT.C ( <a href="#">Ions score 62</a> )               |
| 12 - 22     | 554.2720 | 1106.5294 | 1106.5277 | 0.0017  | 0    | L.SASPGEKVTMT.C ( <a href="#">Ions score 67</a> )               |
| 12 - 22     | 554.2745 | 1106.5345 | 1106.5277 | 0.0068  | 0    | L.SASPGEKVTMT.C ( <a href="#">Ions score 58</a> )               |
| 12 - 22     | 554.2776 | 1106.5406 | 1106.5277 | 0.0129  | 0    | L.SASPGEKVTMT.C ( <a href="#">Ions score 51</a> )               |
| 12 - 22     | 554.2776 | 1106.5406 | 1106.5277 | 0.0129  | 0    | L.SASPGEKVTMT.C ( <a href="#">Ions score 52</a> )               |
| 12 - 22     | 554.2781 | 1106.5416 | 1106.5277 | 0.0139  | 0    | L.SASPGEKVTMT.C ( <a href="#">Ions score 46</a> )               |
| 12 - 22     | 562.2636 | 1122.5127 | 1122.5227 | -0.0100 | 0    | L.SASPGEKVTMT.C Oxidation (M) ( <a href="#">Ions score 44</a> ) |
| 12 - 22     | 562.2646 | 1122.5147 | 1122.5227 | -0.0079 | 0    | L.SASPGEKVTMT.C Oxidation (M) ( <a href="#">Ions score 30</a> ) |
| 12 - 22     | 562.2681 | 1122.5216 | 1122.5227 | -0.0011 | 0    | L.SASPGEKVTMT.C Oxidation (M) ( <a href="#">Ions score 25</a> ) |
| 12 - 22     | 562.2688 | 1122.5230 | 1122.5227 | 0.0004  | 0    | L.SASPGEKVTMT.C Oxidation (M) ( <a href="#">Ions score 64</a> ) |
| 12 - 22     | 562.2690 | 1122.5235 | 1122.5227 | 0.0009  | 0    | L.SASPGEKVTMT.C Oxidation (M) ( <a href="#">Ions score 67</a> ) |
| 12 - 22     | 562.2690 | 1122.5235 | 1122.5227 | 0.0009  | 0    | L.SASPGEKVTMT.C Oxidation (M) ( <a href="#">Ions score 46</a> ) |
| 12 - 22     | 562.2692 | 1122.5238 | 1122.5227 | 0.0011  | 0    | L.SASPGEKVTMT.C Oxidation (M) ( <a href="#">Ions score 37</a> ) |
| 12 - 22     | 562.2697 | 1122.5249 | 1122.5227 | 0.0022  | 0    | L.SASPGEKVTMT.C Oxidation (M) ( <a href="#">Ions score 37</a> ) |
| 12 - 22     | 562.2747 | 1122.5348 | 1122.5227 | 0.0121  | 0    | L.SASPGEKVTMT.C Oxidation (M) ( <a href="#">Ions score 70</a> ) |
| 12 - 22     | 562.2751 | 1122.5356 | 1122.5227 | 0.0130  | 0    | L.SASPGEKVTMT.C Oxidation (M) ( <a href="#">Ions score 52</a> ) |
| 12 - 26     | 791.3683 | 1580.7220 | 1580.7286 | -0.0066 | 0    | L.SASPGEKVTMTCRAS.S ( <a href="#">Ions score 39</a> )           |
| 12 - 26     | 527.9177 | 1580.7313 | 1580.7286 | 0.0027  | 0    | L.SASPGEKVTMTCRAS.S ( <a href="#">Ions score 46</a> )           |
| 27 - 33     | 396.6972 | 791.3799  | 791.3813  | -0.0014 | 0    | S.SSVSYIH.W ( <a href="#">Ions score 47</a> )                   |
| 27 - 33     | 396.6979 | 791.3812  | 791.3813  | -0.0001 | 0    | S.SSVSYIH.W ( <a href="#">Ions score 54</a> )                   |
| 31 - 35     | 383.1892 | 764.3639  | 764.3646  | -0.0007 | 0    | S.YIHW.F.Q ( <a href="#">Ions score 21</a> )                    |
| 31 - 35     | 383.1895 | 764.3645  | 764.3646  | -0.0000 | 0    | S.YIHW.F.Q ( <a href="#">Ions score 26</a> )                    |
| 31 - 35     | 383.1899 | 764.3652  | 764.3646  | 0.0006  | 0    | S.YIHW.F.Q ( <a href="#">Ions score 27</a> )                    |
| 31 - 35     | 383.1900 | 764.3655  | 764.3646  | 0.0009  | 0    | S.YIHW.F.Q ( <a href="#">Ions score 26</a> )                    |
| 31 - 36     | 447.2186 | 892.4226  | 892.4232  | -0.0005 | 0    | S.YIHW.F.Q ( <a href="#">Ions score 31</a> )                    |
| 31 - 36     | 447.2188 | 892.4229  | 892.4232  | -0.0002 | 0    | S.YIHW.F.Q ( <a href="#">Ions score 26</a> )                    |
| 31 - 36     | 447.2189 | 892.4233  | 892.4232  | 0.0001  | 0    | S.YIHW.F.Q ( <a href="#">Ions score 28</a> )                    |
| 34 - 40     | 445.7297 | 889.4448  | 889.4446  | 0.0002  | 0    | H.WFQKPG.S ( <a href="#">Ions score 26</a> )                    |
| 34 - 46     | 524.9373 | 1571.7901 | 1571.7885 | 0.0017  | 0    | H.WFQKPGSSPKPW.I ( <a href="#">Ions score 23</a> )              |
| 34 - 46     | 524.9377 | 1571.7912 | 1571.7885 | 0.0028  | 0    | H.WFQKPGSSPKPW.I ( <a href="#">Ions score 21</a> )              |
| 34 - 46     | 786.9030 | 1571.7915 | 1571.7885 | 0.0030  | 0    | H.WFQKPGSSPKPW.I ( <a href="#">Ions score 40</a> )              |
| 34 - 46     | 786.9036 | 1571.7926 | 1571.7885 | 0.0041  | 0    | H.WFQKPGSSPKPW.I ( <a href="#">Ions score 46</a> )              |
| 34 - 46     | 786.9039 | 1571.7932 | 1571.7885 | 0.0047  | 0    | H.WFQKPGSSPKPW.I ( <a href="#">Ions score 60</a> )              |
| 34 - 46     | 786.9040 | 1571.7934 | 1571.7885 | 0.0050  | 0    | H.WFQKPGSSPKPW.I ( <a href="#">Ions score 53</a> )              |
| 34 - 46     | 524.9385 | 1571.7936 | 1571.7885 | 0.0051  | 0    | H.WFQKPGSSPKPW.I ( <a href="#">Ions score 32</a> )              |
| 34 - 48     | 924.9767 | 1847.9388 | 1847.9359 | 0.0030  | 0    | H.WFQKPGSSPKPWIY.A ( <a href="#">Ions score 27</a> )            |
| 34 - 48     | 616.9871 | 1847.9395 | 1847.9359 | 0.0037  | 0    | H.WFQKPGSSPKPWIY.A ( <a href="#">Ions score 30</a> )            |
| 34 - 48     | 616.9879 | 1847.9419 | 1847.9359 | 0.0061  | 0    | H.WFQKPGSSPKPWIY.A ( <a href="#">Ions score 23</a> )            |
| 34 - 48     | 924.9785 | 1847.9425 | 1847.9359 | 0.0066  | 0    | H.WFQKPGSSPKPWIY.A ( <a href="#">Ions score 21</a> )            |
| 35 - 46     | 462.9090 | 1385.7053 | 1385.7092 | -0.0039 | 0    | F.FQKPGSSPKPW.I ( <a href="#">Ions score 22</a> )               |
| 36 - 46     | 620.3335 | 1238.6524 | 1238.6407 | 0.0117  | 0    | F.QQKPGSSPKPW.I ( <a href="#">Ions score 20</a> )               |
| 49 - 61     | 659.8599 | 1317.7052 | 1317.7040 | 0.0011  | 0    | Y.ATSNLASGVPVRF.S ( <a href="#">Ions score 95</a> )             |
| 49 - 62     | 703.3755 | 1404.7364 | 1404.7361 | 0.0004  | 0    | Y.ATSNLASGVPVRF.S.G ( <a href="#">Ions score 64</a> )           |
| 49 - 62     | 703.3772 | 1404.7398 | 1404.7361 | 0.0038  | 0    | Y.ATSNLASGVPVRF.S.G ( <a href="#">Ions score 65</a> )           |
| 49 - 64     | 775.4026 | 1548.7906 | 1548.7896 | 0.0011  | 0    | Y.ATSNLASGVPVRF.S.G.S ( <a href="#">Ions score 42</a> )         |

|           |           |           |           |         |   |                         |                  |
|-----------|-----------|-----------|-----------|---------|---|-------------------------|------------------|
| 49 - 64   | 775.4031  | 1548.7917 | 1548.7896 | 0.0022  | 0 | Y.ATSNLAGVPPVRFSGS.G    | (Ions score 88)  |
| 49 - 70   | 1051.5138 | 2101.0130 | 2101.0075 | 0.0055  | 0 | Y.ATSNLAGVPPVRFSGSGS.G  | (Ions score 58)  |
| 49 - 70   | 1051.5150 | 2101.0155 | 2101.0075 | 0.0080  | 0 | Y.ATSNLAGVPPVRFSGSGS.G  | (Ions score 29)  |
| 49 - 72   | 1151.5658 | 2301.1170 | 2301.1236 | -0.0066 | 0 | Y.ATSNLAGVPPVRFSGSGS.G  | (Ions score 78)  |
| 49 - 72   | 1151.5706 | 2301.1266 | 2301.1236 | 0.0030  | 0 | Y.ATSNLAGVPPVRFSGSGS.G  | (Ions score 33)  |
| 49 - 72   | 1151.5706 | 2301.1266 | 2301.1236 | 0.0030  | 0 | Y.ATSNLAGVPPVRFSGSGS.G  | (Ions score 45)  |
| 49 - 72   | 1151.5712 | 2301.1278 | 2301.1236 | 0.0042  | 0 | Y.ATSNLAGVPPVRFSGSGS.G  | (Ions score 66)  |
| 51 - 55   | 491.2456  | 490.2384  | 490.2387  | -0.0003 | 0 | T.SNLAS.G               | (Ions score 32)  |
| 51 - 61   | 573.8172  | 1145.6198 | 1145.6192 | 0.0006  | 0 | T.SNLASGVPVRF.S         | (Ions score 62)  |
| 51 - 61   | 573.8188  | 1145.6230 | 1145.6192 | 0.0038  | 0 | T.SNLASGVPVRF.S         | (Ions score 63)  |
| 51 - 62   | 617.3318  | 1232.6490 | 1232.6513 | -0.0023 | 0 | T.SNLASGVPVRF.S         | (Ions score 60)  |
| 51 - 62   | 617.3334  | 1232.6522 | 1232.6513 | 0.0009  | 0 | T.SNLASGVPVRF.S         | (Ions score 72)  |
| 51 - 62   | 617.3347  | 1232.6548 | 1232.6513 | 0.0035  | 0 | T.SNLASGVPVRF.S         | (Ions score 71)  |
| 51 - 64   | 689.3556  | 1376.6966 | 1376.7048 | -0.0081 | 0 | T.SNLASGVPVRFSGS.G      | (Ions score 69)  |
| 51 - 64   | 689.3560  | 1376.6974 | 1376.7048 | -0.0074 | 0 | T.SNLASGVPVRFSGS.G      | (Ions score 74)  |
| 51 - 70   | 965.4713  | 1928.9281 | 1928.9227 | 0.0053  | 0 | T.SNLASGVPVRFSGSGS.G    | (Ions score 78)  |
| 51 - 70   | 965.4728  | 1928.9311 | 1928.9227 | 0.0084  | 0 | T.SNLASGVPVRFSGSGS.G    | (Ions score 58)  |
| 51 - 72   | 1065.5240 | 2129.0335 | 2129.0388 | -0.0053 | 0 | T.SNLASGVPVRFSGSGS.G    | (Ions score 77)  |
| 51 - 72   | 1065.5254 | 2129.0362 | 2129.0388 | -0.0026 | 0 | T.SNLASGVPVRFSGSGS.G    | (Ions score 100) |
| 51 - 72   | 1065.5269 | 2129.0392 | 2129.0388 | 0.0003  | 0 | T.SNLASGVPVRFSGSGS.G    | (Ions score 48)  |
| 51 - 72   | 1065.5272 | 2129.0399 | 2129.0388 | 0.0011  | 0 | T.SNLASGVPVRFSGSGS.G    | (Ions score 66)  |
| 51 - 72   | 1065.5277 | 2129.0409 | 2129.0388 | 0.0021  | 0 | T.SNLASGVPVRFSGSGS.G    | (Ions score 67)  |
| 52 - 61   | 530.3010  | 1058.5874 | 1058.5872 | 0.0002  | 0 | S.NLAGVPPVRF.S          | (Ions score 50)  |
| 52 - 72   | 1022.0081 | 2042.0017 | 2042.0068 | -0.0051 | 0 | S.NLAGVPPVRFSGSGS.G     | (Ions score 84)  |
| 54 - 61   | 416.7380  | 831.4615  | 831.4602  | 0.0013  | 0 | L.ASGVPPVRF.S           | (Ions score 20)  |
| 54 - 62   | 460.2523  | 918.4901  | 918.4923  | -0.0021 | 0 | L.ASGVPPVRF.S           | (Ions score 43)  |
| 54 - 62   | 460.2525  | 918.4904  | 918.4923  | -0.0019 | 0 | L.ASGVPPVRF.S           | (Ions score 51)  |
| 54 - 62   | 460.2527  | 918.4909  | 918.4923  | -0.0014 | 0 | L.ASGVPPVRF.S           | (Ions score 58)  |
| 54 - 70   | 808.3915  | 1614.7684 | 1614.7637 | 0.0047  | 0 | L.ASGVPPVRFSGSGS.G      | (Ions score 74)  |
| 54 - 72   | 908.4500  | 1814.8855 | 1814.8798 | 0.0057  | 0 | L.ASGVPPVRFSGSGS.G      | (Ions score 21)  |
| 55 - 62   | 424.7340  | 847.4534  | 847.4552  | -0.0018 | 0 | A.SGVPVRF.S             | (Ions score 26)  |
| 56 - 61   | 337.7033  | 673.3920  | 673.3911  | 0.0009  | 0 | S.GVPVRF.S              | (Ions score 32)  |
| 56 - 62   | 381.2183  | 760.4220  | 760.4231  | -0.0011 | 0 | S.GVPVRF.S              | (Ions score 27)  |
| 56 - 62   | 381.2185  | 760.4224  | 760.4231  | -0.0007 | 0 | S.GVPVRF.S              | (Ions score 29)  |
| 56 - 62   | 381.2193  | 760.4240  | 760.4231  | 0.0009  | 0 | S.GVPVRF.S              | (Ions score 34)  |
| 56 - 64   | 453.2457  | 904.4768  | 904.4766  | 0.0002  | 0 | S.GVPVRFSGS.G           | (Ions score 29)  |
| 56 - 70   | 729.3566  | 1456.6986 | 1456.6946 | 0.0040  | 0 | S.GVPVRFSGSGS.G         | (Ions score 77)  |
| 56 - 70   | 729.3569  | 1456.6992 | 1456.6946 | 0.0046  | 0 | S.GVPVRFSGSGS.G         | (Ions score 58)  |
| 56 - 70   | 729.3571  | 1456.6997 | 1456.6946 | 0.0051  | 0 | S.GVPVRFSGSGS.G         | (Ions score 81)  |
| 56 - 72   | 829.4143  | 1656.8141 | 1656.8107 | 0.0034  | 0 | S.GVPVRFSGSGS.G         | (Ions score 69)  |
| 58 - 62   | 303.1731  | 604.3317  | 604.3333  | -0.0016 | 0 | V.PVRF.S                | (Ions score 24)  |
| 58 - 62   | 303.1733  | 604.3320  | 604.3333  | -0.0013 | 0 | V.PVRF.S                | (Ions score 23)  |
| 73 - 78   | 352.7003  | 703.3861  | 703.3864  | -0.0003 | 0 | L.TISRVE.A              | (Ions score 26)  |
| 73 - 85   | 713.3457  | 1424.6769 | 1424.6783 | -0.0014 | 0 | L.TISRVEAEDAATY.Y       | (Ions score 67)  |
| 73 - 85   | 713.3461  | 1424.6777 | 1424.6783 | -0.0006 | 0 | L.TISRVEAEDAATY.Y       | (Ions score 45)  |
| 73 - 85   | 713.3470  | 1424.6794 | 1424.6783 | 0.0011  | 0 | L.TISRVEAEDAATY.Y       | (Ions score 55)  |
| 76 - 80   | 302.1578  | 602.3011  | 602.3024  | -0.0012 | 0 | S.RVEAE.D               | (Ions score 23)  |
| 76 - 80   | 302.1579  | 602.3013  | 602.3024  | -0.0010 | 0 | S.RVEAE.D               | (Ions score 29)  |
| 76 - 80   | 302.1580  | 602.3014  | 602.3024  | -0.0010 | 0 | S.RVEAE.D               | (Ions score 25)  |
| 76 - 80   | 302.1581  | 602.3017  | 602.3024  | -0.0006 | 0 | S.RVEAE.D               | (Ions score 26)  |
| 76 - 84   | 481.2323  | 960.4501  | 960.4512  | -0.0011 | 0 | S.RVEAEDAAT.Y           | (Ions score 26)  |
| 76 - 85   | 562.7623  | 1123.5101 | 1123.5145 | -0.0044 | 0 | S.RVEAEDAATY.Y          | (Ions score 36)  |
| 76 - 85   | 562.7631  | 1123.5117 | 1123.5145 | -0.0028 | 0 | S.RVEAEDAATY.Y          | (Ions score 38)  |
| 76 - 85   | 562.7638  | 1123.5130 | 1123.5145 | -0.0015 | 0 | S.RVEAEDAATY.Y          | (Ions score 33)  |
| 76 - 85   | 562.7639  | 1123.5133 | 1123.5145 | -0.0012 | 0 | S.RVEAEDAATY.Y          | (Ions score 31)  |
| 76 - 85   | 562.7645  | 1123.5145 | 1123.5145 | -0.0000 | 0 | S.RVEAEDAATY.Y          | (Ions score 34)  |
| 76 - 85   | 562.7648  | 1123.5150 | 1123.5145 | 0.0005  | 0 | S.RVEAEDAATY.Y          | (Ions score 53)  |
| 76 - 86   | 644.2966  | 1286.5786 | 1286.5778 | 0.0007  | 0 | S.RVEAEDAATY.C          | (Ions score 33)  |
| 76 - 86   | 644.2976  | 1286.5807 | 1286.5778 | 0.0028  | 0 | S.RVEAEDAATY.C          | (Ions score 47)  |
| 76 - 86   | 644.2979  | 1286.5813 | 1286.5778 | 0.0034  | 0 | S.RVEAEDAATY.C          | (Ions score 44)  |
| 86 - 106  | 804.7280  | 2411.1621 | 2411.1579 | 0.0041  | 0 | Y.YCQWTSNPPTFGGKTLEIK.R | (Ions score 57)  |
| 86 - 106  | 1206.5900 | 2411.1654 | 2411.1579 | 0.0075  | 0 | Y.YCQWTSNPPTFGGKTLEIK.R | (Ions score 59)  |
| 86 - 106  | 804.7295  | 2411.1666 | 2411.1579 | 0.0087  | 0 | Y.YCQWTSNPPTFGGKTLEIK.R | (Ions score 60)  |
| 87 - 106  | 750.3656  | 2248.0750 | 2248.0946 | -0.0196 | 0 | Y.CQWTSNPPTFGGKTLEIK.R  | (Ions score 44)  |
| 87 - 106  | 750.3659  | 2248.0759 | 2248.0946 | -0.0187 | 0 | Y.CQWTSNPPTFGGKTLEIK.R  | (Ions score 43)  |
| 89 - 103  | 795.8997  | 1589.7849 | 1589.7838 | 0.0011  | 0 | Q.QWTSNPPTFGGKTLEIK.R   | (Ions score 49)  |
| 89 - 103  | 795.9018  | 1589.7890 | 1589.7838 | 0.0053  | 0 | Q.QWTSNPPTFGGKTLEIK.R   | (Ions score 50)  |
| 89 - 103  | 795.9023  | 1589.7900 | 1589.7838 | 0.0062  | 0 | Q.QWTSNPPTFGGKTLEIK.R   | (Ions score 63)  |
| 89 - 106  | 654.3384  | 1959.9933 | 1960.0054 | -0.0121 | 0 | Q.QWTSNPPTFGGKTLEIK.R   | (Ions score 36)  |
| 89 - 106  | 981.0040  | 1959.9935 | 1960.0054 | -0.0119 | 0 | Q.QWTSNPPTFGGKTLEIK.R   | (Ions score 63)  |
| 89 - 106  | 654.3387  | 1959.9942 | 1960.0054 | -0.0111 | 0 | Q.QWTSNPPTFGGKTLEIK.R   | (Ions score 22)  |
| 89 - 106  | 654.3387  | 1959.9942 | 1960.0054 | -0.0111 | 0 | Q.QWTSNPPTFGGKTLEIK.R   | (Ions score 47)  |
| 89 - 106  | 981.0051  | 1959.9957 | 1960.0054 | -0.0097 | 0 | Q.QWTSNPPTFGGKTLEIK.R   | (Ions score 52)  |
| 89 - 106  | 981.0056  | 1959.9967 | 1960.0054 | -0.0087 | 0 | Q.QWTSNPPTFGGKTLEIK.R   | (Ions score 58)  |
| 89 - 106  | 654.3430  | 1960.0072 | 1960.0054 | 0.0019  | 0 | Q.QWTSNPPTFGGKTLEIK.R   | (Ions score 39)  |
| 89 - 106  | 654.3432  | 1960.0078 | 1960.0054 | 0.0024  | 0 | Q.QWTSNPPTFGGKTLEIK.R   | (Ions score 23)  |
| 91 - 103  | 638.8293  | 1275.6440 | 1275.6459 | -0.0019 | 0 | W.TSNPPTFGGKTLEIK.R     | (Ions score 53)  |
| 91 - 103  | 638.8302  | 1275.6458 | 1275.6459 | -0.0000 | 0 | W.TSNPPTFGGKTLEIK.R     | (Ions score 55)  |
| 91 - 106  | 823.9409  | 1645.8673 | 1645.8675 | -0.0002 | 0 | W.TSNPPTFGGKTLEIK.R     | (Ions score 47)  |
| 91 - 106  | 823.9421  | 1645.8696 | 1645.8675 | 0.0021  | 0 | W.TSNPPTFGGKTLEIK.R     | (Ions score 24)  |
| 91 - 106  | 823.9421  | 1645.8696 | 1645.8675 | 0.0021  | 0 | W.TSNPPTFGGKTLEIK.R     | (Ions score 58)  |
| 94 - 106  | 672.8788  | 1343.7431 | 1343.7448 | -0.0017 | 0 | N.PPTFGGKTLEIK.R        | (Ions score 61)  |
| 94 - 106  | 448.9219  | 1343.7439 | 1343.7448 | -0.0010 | 0 | N.PPTFGGKTLEIK.R        | (Ions score 46)  |
| 94 - 106  | 448.9221  | 1343.7445 | 1343.7448 | -0.0003 | 0 | N.PPTFGGKTLEIK.R        | (Ions score 32)  |
| 94 - 106  | 448.9224  | 1343.7453 | 1343.7448 | 0.0004  | 0 | N.PPTFGGKTLEIK.R        | (Ions score 35)  |
| 107 - 113 | 351.2003  | 700.3861  | 700.3868  | -0.0007 | 0 | K.RTVAAPS.V             | (Ions score 22)  |
| 107 - 113 | 351.2004  | 700.3863  | 700.3868  | -0.0005 | 0 | K.RTVAAPS.V             | (Ions score 29)  |
| 107 - 115 | 474.2694  | 946.5243  | 946.5236  | 0.0007  | 0 | K.RTVAAPSVF.I           | (Ions score 46)  |
| 107 - 115 | 474.2699  | 946.5252  | 946.5236  | 0.0017  | 0 | K.RTVAAPSVF.I           | (Ions score 41)  |
| 107 - 115 | 474.2700  | 946.5254  | 946.5236  | 0.0018  | 0 | K.RTVAAPSVF.I           | (Ions score 50)  |
| 107 - 115 | 474.2706  | 946.5266  | 946.5236  | 0.0030  | 0 | K.RTVAAPSVF.I           | (Ions score 23)  |
| 107 - 115 | 474.2709  | 946.5273  | 946.5236  | 0.0037  | 0 | K.RTVAAPSVF.I           | (Ions score 37)  |

|           |          |           |           |         |   |                       |                 |
|-----------|----------|-----------|-----------|---------|---|-----------------------|-----------------|
| 107 - 115 | 474.2713 | 946.5281  | 946.5236  | 0.0045  | 0 | K.RTVAAPSVF.I         | (Ions score 48) |
| 107 - 115 | 474.2715 | 946.5284  | 946.5236  | 0.0048  | 0 | K.RTVAAPSVF.I         | (Ions score 42) |
| 114 - 126 | 753.8961 | 1505.7777 | 1505.7766 | 0.0011  | 0 | S.VFIFPPSDEQLKS.G     | (Ions score 40) |
| 114 - 126 | 753.8963 | 1505.7781 | 1505.7766 | 0.0015  | 0 | S.VFIFPPSDEQLKS.G     | (Ions score 39) |
| 114 - 126 | 753.8964 | 1505.7782 | 1505.7766 | 0.0016  | 0 | S.VFIFPPSDEQLKS.G     | (Ions score 67) |
| 114 - 126 | 753.8965 | 1505.7784 | 1505.7766 | 0.0019  | 0 | S.VFIFPPSDEQLKS.G     | (Ions score 43) |
| 114 - 129 | 868.4493 | 1734.8841 | 1734.8828 | 0.0013  | 0 | S.VFIFPPSDEQLKSGTA.S  | (Ions score 66) |
| 114 - 129 | 868.4496 | 1734.8847 | 1734.8828 | 0.0019  | 0 | S.VFIFPPSDEQLKSGTA.S  | (Ions score 50) |
| 114 - 129 | 868.4499 | 1734.8852 | 1734.8828 | 0.0024  | 0 | S.VFIFPPSDEQLKSGTA.S  | (Ions score 53) |
| 114 - 129 | 868.4500 | 1734.8854 | 1734.8828 | 0.0026  | 0 | S.VFIFPPSDEQLKSGTA.S  | (Ions score 53) |
| 114 - 129 | 868.4501 | 1734.8856 | 1734.8828 | 0.0028  | 0 | S.VFIFPPSDEQLKSGTA.S  | (Ions score 61) |
| 114 - 129 | 868.4501 | 1734.8857 | 1734.8828 | 0.0029  | 0 | S.VFIFPPSDEQLKSGTA.S  | (Ions score 41) |
| 114 - 129 | 868.4502 | 1734.8858 | 1734.8828 | 0.0030  | 0 | S.VFIFPPSDEQLKSGTA.S  | (Ions score 74) |
| 114 - 129 | 868.4503 | 1734.8860 | 1734.8828 | 0.0032  | 0 | S.VFIFPPSDEQLKSGTA.S  | (Ions score 48) |
| 114 - 129 | 868.4504 | 1734.8863 | 1734.8828 | 0.0035  | 0 | S.VFIFPPSDEQLKSGTA.S  | (Ions score 76) |
| 114 - 129 | 868.4504 | 1734.8863 | 1734.8828 | 0.0035  | 0 | S.VFIFPPSDEQLKSGTA.S  | (Ions score 57) |
| 114 - 129 | 868.4505 | 1734.8864 | 1734.8828 | 0.0037  | 0 | S.VFIFPPSDEQLKSGTA.S  | (Ions score 33) |
| 114 - 129 | 868.4506 | 1734.8867 | 1734.8828 | 0.0039  | 0 | S.VFIFPPSDEQLKSGTA.S  | (Ions score 37) |
| 116 - 126 | 630.8268 | 1259.6391 | 1259.6397 | -0.0006 | 0 | F.IFPPSDEQLKS.G       | (Ions score 27) |
| 116 - 126 | 630.8279 | 1259.6413 | 1259.6397 | 0.0016  | 0 | F.IFPPSDEQLKS.G       | (Ions score 21) |
| 116 - 126 | 630.8281 | 1259.6417 | 1259.6397 | 0.0020  | 0 | F.IFPPSDEQLKS.G       | (Ions score 36) |
| 116 - 126 | 630.8283 | 1259.6421 | 1259.6397 | 0.0023  | 0 | F.IFPPSDEQLKS.G       | (Ions score 20) |
| 116 - 126 | 630.8284 | 1259.6423 | 1259.6397 | 0.0026  | 0 | F.IFPPSDEQLKS.G       | (Ions score 48) |
| 116 - 126 | 630.8284 | 1259.6423 | 1259.6397 | 0.0026  | 0 | F.IFPPSDEQLKS.G       | (Ions score 34) |
| 116 - 126 | 630.8287 | 1259.6429 | 1259.6397 | 0.0032  | 0 | F.IFPPSDEQLKS.G       | (Ions score 30) |
| 116 - 126 | 630.8289 | 1259.6432 | 1259.6397 | 0.0034  | 0 | F.IFPPSDEQLKS.G       | (Ions score 39) |
| 116 - 126 | 630.8290 | 1259.6434 | 1259.6397 | 0.0037  | 0 | F.IFPPSDEQLKS.G       | (Ions score 24) |
| 116 - 126 | 630.8292 | 1259.6439 | 1259.6397 | 0.0042  | 0 | F.IFPPSDEQLKS.G       | (Ions score 28) |
| 116 - 126 | 630.8292 | 1259.6439 | 1259.6397 | 0.0042  | 0 | F.IFPPSDEQLKS.G       | (Ions score 46) |
| 116 - 126 | 630.8293 | 1259.6440 | 1259.6397 | 0.0043  | 0 | F.IFPPSDEQLKS.G       | (Ions score 38) |
| 116 - 126 | 630.8294 | 1259.6443 | 1259.6397 | 0.0045  | 0 | F.IFPPSDEQLKS.G       | (Ions score 47) |
| 116 - 126 | 630.8294 | 1259.6443 | 1259.6397 | 0.0045  | 0 | F.IFPPSDEQLKS.G       | (Ions score 36) |
| 116 - 126 | 630.8295 | 1259.6445 | 1259.6397 | 0.0048  | 0 | F.IFPPSDEQLKS.G       | (Ions score 25) |
| 116 - 126 | 630.8305 | 1259.6465 | 1259.6397 | 0.0067  | 0 | F.IFPPSDEQLKS.G       | (Ions score 34) |
| 116 - 129 | 745.3702 | 1488.7258 | 1488.7460 | -0.0202 | 0 | F.IFPPSDEQLKSGTA.S    | (Ions score 48) |
| 116 - 129 | 745.3752 | 1488.7358 | 1488.7460 | -0.0102 | 0 | F.IFPPSDEQLKSGTA.S    | (Ions score 38) |
| 116 - 129 | 745.3766 | 1488.7387 | 1488.7460 | -0.0072 | 0 | F.IFPPSDEQLKSGTA.S    | (Ions score 40) |
| 116 - 129 | 745.3800 | 1488.7455 | 1488.7460 | -0.0005 | 0 | F.IFPPSDEQLKSGTA.S    | (Ions score 47) |
| 116 - 129 | 745.3804 | 1488.7463 | 1488.7460 | 0.0003  | 0 | F.IFPPSDEQLKSGTA.S    | (Ions score 68) |
| 116 - 129 | 745.3805 | 1488.7464 | 1488.7460 | 0.0004  | 0 | F.IFPPSDEQLKSGTA.S    | (Ions score 50) |
| 116 - 129 | 745.3807 | 1488.7469 | 1488.7460 | 0.0009  | 0 | F.IFPPSDEQLKSGTA.S    | (Ions score 25) |
| 116 - 129 | 745.3810 | 1488.7474 | 1488.7460 | 0.0014  | 0 | F.IFPPSDEQLKSGTA.S    | (Ions score 22) |
| 116 - 129 | 745.3812 | 1488.7478 | 1488.7460 | 0.0018  | 0 | F.IFPPSDEQLKSGTA.S    | (Ions score 43) |
| 116 - 129 | 745.3818 | 1488.7490 | 1488.7460 | 0.0030  | 0 | F.IFPPSDEQLKSGTA.S    | (Ions score 53) |
| 116 - 129 | 745.3823 | 1488.7500 | 1488.7460 | 0.0040  | 0 | F.IFPPSDEQLKSGTA.S    | (Ions score 49) |
| 116 - 129 | 745.3825 | 1488.7505 | 1488.7460 | 0.0045  | 0 | F.IFPPSDEQLKSGTA.S    | (Ions score 47) |
| 116 - 129 | 745.3826 | 1488.7506 | 1488.7460 | 0.0046  | 0 | F.IFPPSDEQLKSGTA.S    | (Ions score 52) |
| 116 - 129 | 745.3829 | 1488.7513 | 1488.7460 | 0.0053  | 0 | F.IFPPSDEQLKSGTA.S    | (Ions score 51) |
| 116 - 129 | 745.3830 | 1488.7514 | 1488.7460 | 0.0055  | 0 | F.IFPPSDEQLKSGTA.S    | (Ions score 54) |
| 116 - 129 | 745.3831 | 1488.7516 | 1488.7460 | 0.0056  | 0 | F.IFPPSDEQLKSGTA.S    | (Ions score 33) |
| 116 - 129 | 745.3832 | 1488.7519 | 1488.7460 | 0.0059  | 0 | F.IFPPSDEQLKSGTA.S    | (Ions score 52) |
| 116 - 129 | 745.3834 | 1488.7522 | 1488.7460 | 0.0062  | 0 | F.IFPPSDEQLKSGTA.S    | (Ions score 44) |
| 116 - 129 | 745.3837 | 1488.7529 | 1488.7460 | 0.0069  | 0 | F.IFPPSDEQLKSGTA.S    | (Ions score 41) |
| 116 - 129 | 745.3841 | 1488.7536 | 1488.7460 | 0.0076  | 0 | F.IFPPSDEQLKSGTA.S    | (Ions score 43) |
| 116 - 129 | 745.3845 | 1488.7544 | 1488.7460 | 0.0084  | 0 | F.IFPPSDEQLKSGTA.S    | (Ions score 47) |
| 116 - 129 | 745.3845 | 1488.7544 | 1488.7460 | 0.0084  | 0 | F.IFPPSDEQLKSGTA.S    | (Ions score 29) |
| 116 - 129 | 745.3848 | 1488.7550 | 1488.7460 | 0.0090  | 0 | F.IFPPSDEQLKSGTA.S    | (Ions score 56) |
| 116 - 132 | 887.9646 | 1773.9146 | 1773.9148 | -0.0002 | 0 | F.IFPPSDEQLKSGTASVV.C | (Ions score 53) |
| 116 - 132 | 887.9648 | 1773.9151 | 1773.9148 | 0.0003  | 0 | F.IFPPSDEQLKSGTASVV.C | (Ions score 48) |
| 116 - 132 | 887.9649 | 1773.9153 | 1773.9148 | 0.0004  | 0 | F.IFPPSDEQLKSGTASVV.C | (Ions score 27) |
| 116 - 132 | 887.9655 | 1773.9164 | 1773.9148 | 0.0015  | 0 | F.IFPPSDEQLKSGTASVV.C | (Ions score 42) |
| 116 - 132 | 887.9656 | 1773.9167 | 1773.9148 | 0.0019  | 0 | F.IFPPSDEQLKSGTASVV.C | (Ions score 42) |
| 116 - 132 | 887.9657 | 1773.9168 | 1773.9148 | 0.0020  | 0 | F.IFPPSDEQLKSGTASVV.C | (Ions score 36) |
| 116 - 132 | 887.9658 | 1773.9170 | 1773.9148 | 0.0021  | 0 | F.IFPPSDEQLKSGTASVV.C | (Ions score 34) |
| 116 - 132 | 887.9662 | 1773.9178 | 1773.9148 | 0.0030  | 0 | F.IFPPSDEQLKSGTASVV.C | (Ions score 33) |
| 116 - 132 | 887.9664 | 1773.9182 | 1773.9148 | 0.0034  | 0 | F.IFPPSDEQLKSGTASVV.C | (Ions score 30) |
| 116 - 132 | 887.9672 | 1773.9198 | 1773.9148 | 0.0049  | 0 | F.IFPPSDEQLKSGTASVV.C | (Ions score 31) |
| 116 - 132 | 887.9680 | 1773.9215 | 1773.9148 | 0.0067  | 0 | F.IFPPSDEQLKSGTASVV.C | (Ions score 38) |
| 116 - 132 | 887.9684 | 1773.9223 | 1773.9148 | 0.0075  | 0 | F.IFPPSDEQLKSGTASVV.C | (Ions score 22) |
| 133 - 137 | 633.3044 | 632.2972  | 632.2952  | 0.0020  | 0 | V.CLLNN.F             | (Ions score 26) |
| 133 - 141 | 598.7975 | 1195.5805 | 1195.5808 | -0.0002 | 0 | V.CLLNNFYPR.E         | (Ions score 46) |
| 133 - 141 | 598.7978 | 1195.5810 | 1195.5808 | 0.0003  | 0 | V.CLLNNFYPR.E         | (Ions score 41) |
| 134 - 141 | 518.7793 | 1035.5440 | 1035.5501 | -0.0061 | 0 | C.LLNNFYPR.E          | (Ions score 62) |
| 134 - 141 | 518.7826 | 1035.5506 | 1035.5501 | 0.0005  | 0 | C.LLNNFYPR.E          | (Ions score 51) |
| 134 - 141 | 518.7830 | 1035.5514 | 1035.5501 | 0.0012  | 0 | C.LLNNFYPR.E          | (Ions score 57) |
| 135 - 141 | 462.2394 | 922.4643  | 922.4661  | -0.0018 | 0 | L.LNNTFYPR.E          | (Ions score 46) |
| 135 - 141 | 462.2397 | 922.4649  | 922.4661  | -0.0011 | 0 | L.LNNTFYPR.E          | (Ions score 39) |
| 135 - 141 | 462.2402 | 922.4659  | 922.4661  | -0.0002 | 0 | L.LNNTFYPR.E          | (Ions score 45) |
| 136 - 141 | 405.6971 | 809.3797  | 809.3820  | -0.0023 | 0 | L.NNNTFYPR.E          | (Ions score 25) |
| 136 - 141 | 405.6976 | 809.3806  | 809.3820  | -0.0014 | 0 | L.NNNTFYPR.E          | (Ions score 27) |
| 136 - 141 | 405.6976 | 809.3806  | 809.3820  | -0.0014 | 0 | L.NNNTFYPR.E          | (Ions score 27) |
| 136 - 141 | 405.6977 | 809.3809  | 809.3820  | -0.0011 | 0 | L.NNNTFYPR.E          | (Ions score 27) |
| 136 - 141 | 405.6978 | 809.3810  | 809.3820  | -0.0010 | 0 | L.NNNTFYPR.E          | (Ions score 29) |
| 136 - 141 | 405.6979 | 809.3812  | 809.3820  | -0.0008 | 0 | L.NNNTFYPR.E          | (Ions score 22) |
| 136 - 141 | 405.6983 | 809.3820  | 809.3820  | -0.0000 | 0 | L.NNNTFYPR.E          | (Ions score 30) |
| 136 - 141 | 405.6983 | 809.3821  | 809.3820  | 0.0001  | 0 | L.NNNTFYPR.E          | (Ions score 31) |
| 136 - 141 | 405.6985 | 809.3824  | 809.3820  | 0.0004  | 0 | L.NNNTFYPR.E          | (Ions score 25) |
| 136 - 146 | 683.3500 | 1364.6854 | 1364.6836 | 0.0018  | 0 | L.NNNTFYPREAKVQ.W     | (Ions score 39) |
| 136 - 146 | 683.3506 | 1364.6866 | 1364.6836 | 0.0030  | 0 | L.NNNTFYPREAKVQ.W     | (Ions score 40) |
| 136 - 146 | 455.9030 | 1364.6871 | 1364.6836 | 0.0035  | 0 | L.NNNTFYPREAKVQ.W     | (Ions score 31) |
| 137 - 141 | 348.6732 | 695.3318  | 695.3391  | -0.0073 | 0 | N.NNTFYPR.E           | (Ions score 27) |
| 137 - 141 | 348.6739 | 695.3332  | 695.3391  | -0.0059 | 0 | N.NNTFYPR.E           | (Ions score 25) |

|           |           |           |           |         |   |                                |                  |
|-----------|-----------|-----------|-----------|---------|---|--------------------------------|------------------|
| 137 - 141 | 348.6754  | 695.3363  | 695.3391  | -0.0027 | 0 | N.NFYPR.E                      | (Ions score 27)  |
| 137 - 141 | 348.6760  | 695.3374  | 695.3391  | -0.0016 | 0 | N.NFYPR.E                      | (Ions score 28)  |
| 137 - 141 | 348.6761  | 695.3376  | 695.3391  | -0.0015 | 0 | N.NFYPR.E                      | (Ions score 30)  |
| 137 - 141 | 348.6762  | 695.3378  | 695.3391  | -0.0013 | 0 | N.NFYPR.E                      | (Ions score 20)  |
| 137 - 141 | 348.6765  | 695.3384  | 695.3391  | -0.0007 | 0 | N.NFYPR.E                      | (Ions score 30)  |
| 138 - 146 | 569.3127  | 1136.6108 | 1136.5978 | 0.0130  | 0 | N.FYPREAKVQ.W                  | (Ions score 29)  |
| 147 - 153 | 423.2233  | 844.4320  | 844.4443  | -0.0122 | 0 | Q.WKVDNAL.Q                    | (Ions score 35)  |
| 147 - 153 | 423.2257  | 844.4369  | 844.4443  | -0.0073 | 0 | Q.WKVDNAL.Q                    | (Ions score 41)  |
| 147 - 153 | 423.2263  | 844.4380  | 844.4443  | -0.0063 | 0 | Q.WKVDNAL.Q                    | (Ions score 37)  |
| 147 - 153 | 423.2298  | 844.4450  | 844.4443  | 0.0008  | 0 | Q.WKVDNAL.Q                    | (Ions score 47)  |
| 147 - 154 | 487.2601  | 972.5057  | 972.5029  | 0.0029  | 0 | Q.WKVDNALQ.S                   | (Ions score 44)  |
| 147 - 154 | 487.2609  | 972.5073  | 972.5029  | 0.0044  | 0 | Q.WKVDNALQ.S                   | (Ions score 56)  |
| 147 - 156 | 559.2878  | 1116.5611 | 1116.5563 | 0.0048  | 0 | Q.WKVDNALQSG.N                 | (Ions score 39)  |
| 147 - 157 | 616.3092  | 1230.6039 | 1230.5993 | 0.0046  | 0 | Q.WKVDNALQSGN.S                | (Ions score 79)  |
| 147 - 168 | 817.3867  | 2449.1381 | 2449.1357 | 0.0025  | 0 | Q.WKVDNALQSGNSQESVTEQDSK.D     | (Ions score 95)  |
| 147 - 172 | 972.7779  | 2915.3119 | 2915.3056 | 0.0062  | 0 | Q.WKVDNALQSGNSQESVTEQDSKDY.S   | (Ions score 59)  |
| 147 - 172 | 972.7805  | 2915.3197 | 2915.3056 | 0.0141  | 0 | Q.WKVDNALQSGNSQESVTEQDSKDY.S   | (Ions score 72)  |
| 147 - 172 | 972.7806  | 2915.3199 | 2915.3056 | 0.0143  | 0 | Q.WKVDNALQSGNSQESVTEQDSKDY.S   | (Ions score 82)  |
| 147 - 175 | 1068.4891 | 3202.4456 | 3202.4538 | -0.0082 | 0 | Q.WKVDNALQSGNSQESVTEQDSKDYSL.S | (Ions score 77)  |
| 154 - 168 | 812.3589  | 1622.7032 | 1622.7019 | 0.0013  | 0 | L.QSGNSQESVTEQDSK.D            | (Ions score 49)  |
| 154 - 172 | 1045.4436 | 2088.8727 | 2088.8719 | 0.0007  | 0 | L.QSGNSQESVTEQDSKDY.S          | (Ions score 70)  |
| 154 - 172 | 1045.4459 | 2088.8773 | 2088.8719 | 0.0054  | 0 | L.QSGNSQESVTEQDSKDY.S          | (Ions score 124) |
| 154 - 172 | 1045.4460 | 2088.8775 | 2088.8719 | 0.0056  | 0 | L.QSGNSQESVTEQDSKDY.S          | (Ions score 104) |
| 155 - 172 | 981.4172  | 1960.8198 | 1960.8134 | 0.0064  | 0 | Q.SGNSQESVTEQDSKDY.S           | (Ions score 91)  |
| 157 - 172 | 909.3902  | 1816.7658 | 1816.7599 | 0.0060  | 0 | G.NSQESVTEQDSKDY.S             | (Ions score 83)  |
| 158 - 172 | 852.3672  | 1702.7199 | 1702.7169 | 0.0030  | 0 | N.SQESVTEQDSKDY.S              | (Ions score 95)  |
| 158 - 172 | 852.3680  | 1702.7214 | 1702.7169 | 0.0045  | 0 | N.SQESVTEQDSKDY.S              | (Ions score 91)  |
| 160 - 172 | 744.8219  | 1487.6292 | 1487.6263 | 0.0029  | 0 | Q.ESVTEQDSKDY.S                | (Ions score 38)  |
| 166 - 172 | 408.1746  | 814.3346  | 814.3345  | 0.0002  | 0 | Q.DSKDY.S                      | (Ions score 21)  |
| 179 - 191 | 527.9471  | 1580.8194 | 1580.8198 | -0.0004 | 0 | L.TLSKADYKHKVY.A               | (Ions score 22)  |
| 179 - 191 | 527.9479  | 1580.8218 | 1580.8198 | 0.0020  | 0 | L.TLSKADYKHKVY.A               | (Ions score 33)  |
| 180 - 191 | 494.2646  | 1479.7718 | 1479.7721 | -0.0003 | 0 | T.LSKADYKHKVY.A                | (Ions score 34)  |
| 181 - 191 | 456.5698  | 1366.6876 | 1366.6881 | -0.0005 | 0 | L.SKADYKHKVY.A                 | (Ions score 33)  |
| 181 - 191 | 456.5699  | 1366.6879 | 1366.6881 | -0.0001 | 0 | L.SKADYKHKVY.A                 | (Ions score 34)  |
| 182 - 191 | 427.5596  | 1279.6569 | 1279.6560 | 0.0008  | 0 | S.KADYKHKVY.A                  | (Ions score 21)  |
| 184 - 191 | 541.2688  | 1080.5230 | 1080.5240 | -0.0009 | 0 | A.DYKHKVY.A                    | (Ions score 24)  |
| 192 - 196 | 579.2446  | 578.2374  | 578.2370  | 0.0004  | 0 | Y.ACEVT.H                      | (Ions score 32)  |
| 192 - 198 | 422.6842  | 843.3538  | 843.3545  | -0.0007 | 0 | Y.ACEVTHQ.G                    | (Ions score 56)  |
| 192 - 198 | 422.6850  | 843.3554  | 843.3545  | 0.0009  | 0 | Y.ACEVTHQ.G                    | (Ions score 52)  |
| 194 - 198 | 307.1500  | 612.2854  | 612.2867  | -0.0014 | 0 | C.EVTHQ.G                      | (Ions score 21)  |
| 194 - 198 | 307.1501  | 612.2856  | 612.2867  | -0.0011 | 0 | C.EVTHQ.G                      | (Ions score 20)  |
| 194 - 198 | 307.1501  | 612.2857  | 612.2867  | -0.0010 | 0 | C.EVTHQ.G                      | (Ions score 23)  |
| 197 - 206 | 527.2875  | 1052.5604 | 1052.5614 | -0.0010 | 0 | T.HQGLSSPVTK.S                 | (Ions score 21)  |
| 197 - 206 | 527.2880  | 1052.5614 | 1052.5614 | -0.0001 | 0 | T.HQGLSSPVTK.S                 | (Ions score 35)  |
| 197 - 208 | 644.3384  | 1286.6623 | 1286.6619 | 0.0005  | 0 | T.HQGLSSPVTKSF.N               | (Ions score 57)  |
| 199 - 206 | 394.7290  | 787.4435  | 787.4439  | -0.0005 | 0 | Q.GLSSPVTK.S                   | (Ions score 33)  |
| 199 - 206 | 394.7304  | 787.4463  | 787.4439  | 0.0023  | 0 | Q.GLSSPVTK.S                   | (Ions score 41)  |
| 199 - 206 | 394.7332  | 787.4519  | 787.4439  | 0.0079  | 0 | Q.GLSSPVTK.S                   | (Ions score 38)  |
| 199 - 206 | 394.7336  | 787.4525  | 787.4439  | 0.0086  | 0 | Q.GLSSPVTK.S                   | (Ions score 38)  |
| 199 - 206 | 394.7340  | 787.4535  | 787.4439  | 0.0095  | 0 | Q.GLSSPVTK.S                   | (Ions score 37)  |
| 199 - 206 | 394.7340  | 787.4535  | 787.4439  | 0.0096  | 0 | Q.GLSSPVTK.S                   | (Ions score 35)  |
| 199 - 206 | 394.7342  | 787.4538  | 787.4439  | 0.0098  | 0 | Q.GLSSPVTK.S                   | (Ions score 39)  |
| 199 - 208 | 511.7788  | 1021.5431 | 1021.5444 | -0.0012 | 0 | Q.GLSSPVTKSF.N                 | (Ions score 41)  |
| 199 - 208 | 511.7795  | 1021.5445 | 1021.5444 | 0.0001  | 0 | Q.GLSSPVTKSF.N                 | (Ions score 58)  |
| 199 - 208 | 511.7803  | 1021.5461 | 1021.5444 | 0.0017  | 0 | Q.GLSSPVTKSF.N                 | (Ions score 63)  |
| 199 - 213 | 546.9342  | 1637.7808 | 1637.7831 | -0.0023 | 0 | Q.GLSSPVTKSFNRGEC.-            | (Ions score 39)  |
| 199 - 213 | 546.9347  | 1637.7822 | 1637.7831 | -0.0008 | 0 | Q.GLSSPVTKSFNRGEC.-            | (Ions score 37)  |
| 199 - 213 | 819.8990  | 1637.7834 | 1637.7831 | 0.0003  | 0 | Q.GLSSPVTKSFNRGEC.-            | (Ions score 65)  |
| 201 - 206 | 309.6762  | 617.3378  | 617.3384  | -0.0006 | 0 | L.SSPVTK.S                     | (Ions score 38)  |
| 207 - 213 | 435.1819  | 868.3492  | 868.3497  | -0.0005 | 0 | K.SFNRGEC.-                    | (Ions score 42)  |
| 207 - 213 | 435.1823  | 868.3501  | 868.3497  | 0.0004  | 0 | K.SFNRGEC.-                    | (Ions score 45)  |

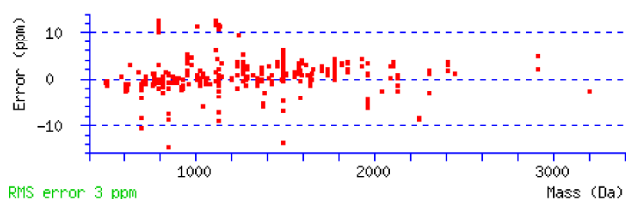

Mascot: <http://www.matrixscience.com/>
