# Supplementary material for: An alternative for proteinase K-heat-sensitive protease from fungus Onygena corvina for biotechnology: cloning, engineering, expression, characterization and special application for protein sequencing
Source: PubMed Central journal article supplement (PMC7313183; doi:10.1186/s12934-020-01392-3), 2020-06-24
Supplement: 12934_2020_1392_MOESM20_ESM.pdf [file 12934_2020_1392_MOESM20_ESM.pdf]

XIC (base peak), m/z: 200.0000 - 2000.0000

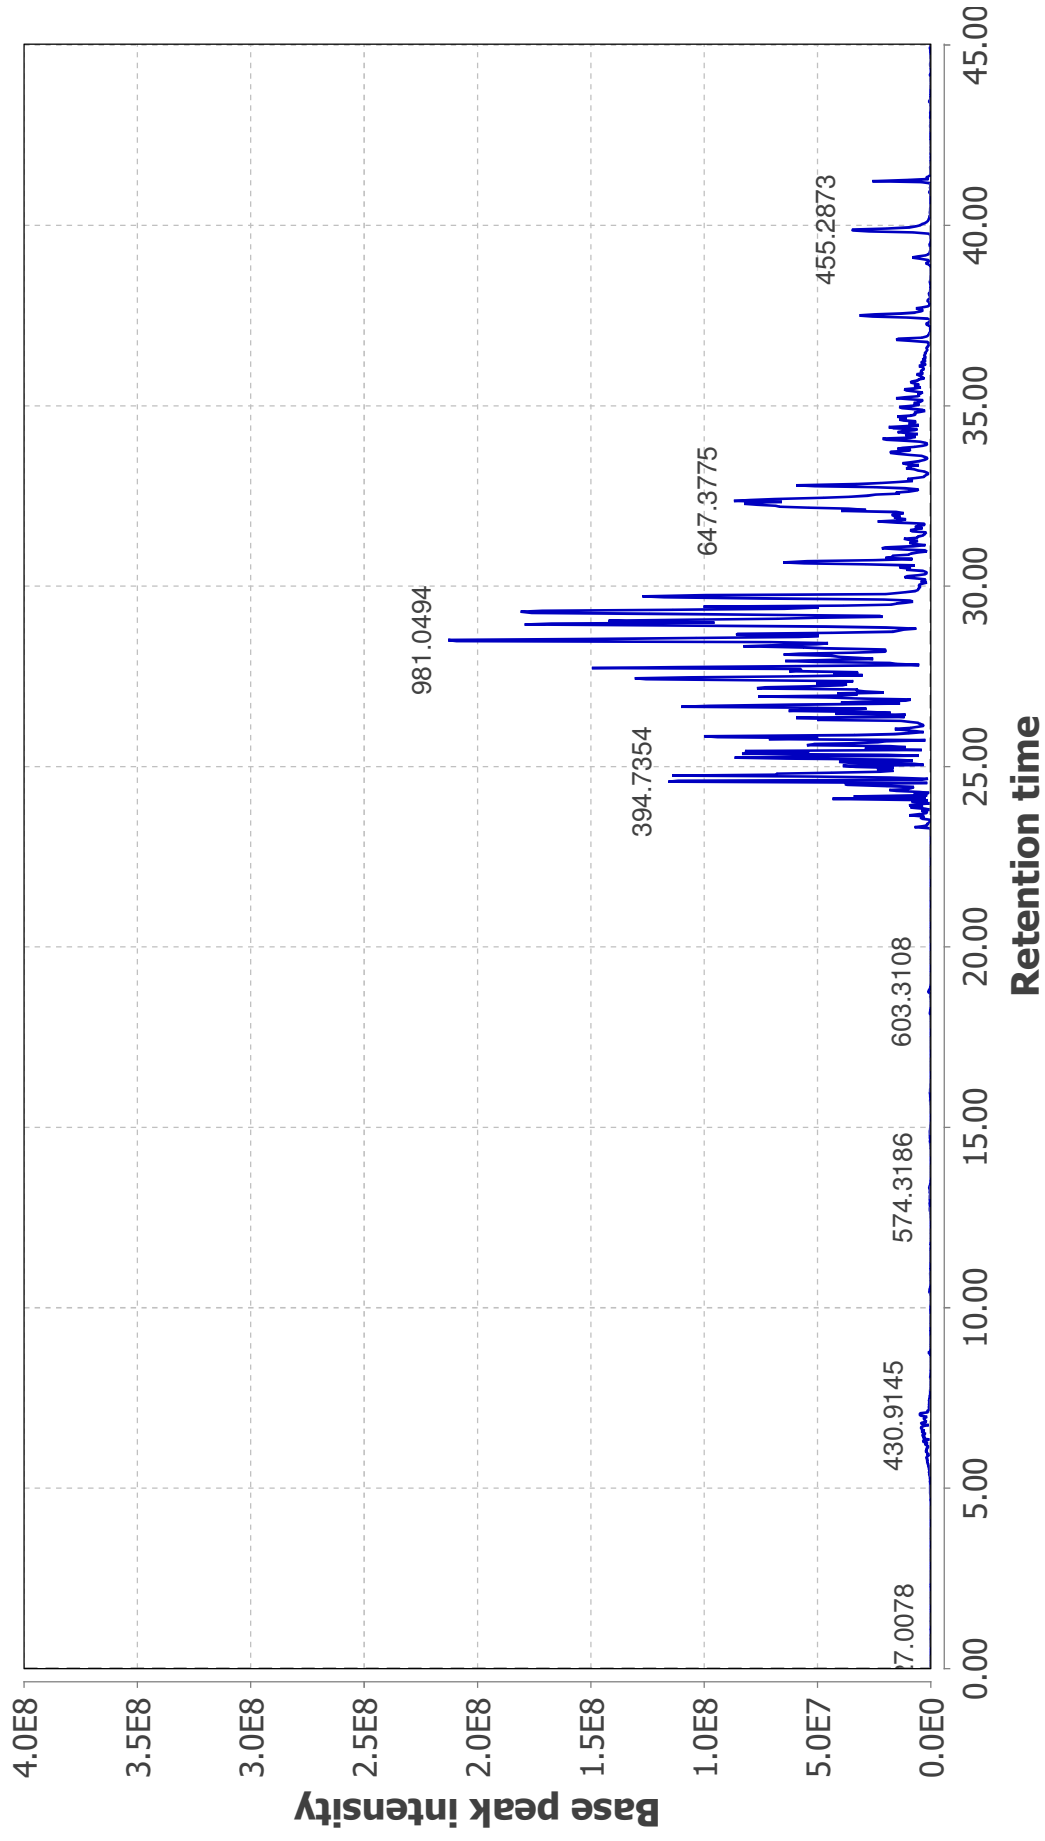

— 8375\_mAB\_HL1\_1070nl.raw
